# Supplementary material for: Treatment with the Proteasome Inhibitor MG132 during the End of Oocyte Maturation Improves Oocyte Competence for Development after Fertilization in Cattle
Source: PLoS One. 2012 Nov 7;7(11):e48613. doi: 10.1371/journal.pone.0048613 (PMC3492449; doi:10.1371/journal.pone.0048613)
Supplement: File S1 — Results of analysis of the oocyte proteome. The first tab contains data from all proteins detected while the second tab is a subset of data from proteins that were differentially expressed between MG132 and vehicle. Cells in which there was significant increase in relative expression caused by MG132 are highlighted in orange whereas cells in which there was a decrease in relative expression are highlighted in blue. (XLSX) [file pone.0048613.s002.xlsx]

## Sheet: All proteins
Data	New NO.	N	Unused	Total	%Cov	%Cov(50)	%Cov(95)	Accession	Name	Species	Peptides(95%)	C1/C1_1 115:114 FC	C1/C1_1 PVal 115:114	C3/C2 115:114 FC	C3/C2 PVal 115:114	Avg in controls FC	Fisher's Exact Test (Meta-Anal)	in controls Fisher's Exact Test (Meta-Anal) Pval	T1/C1 116:114 FC	T1/C1 116:114 FC	T2/C2 116:114 FC	T2/C2 PVal 116:114	T3/C3 117:115 FC	T3/C3 PVal 117:115	Avg Treated/Control FC	Fisher's Exact Test (Meta-Anal)	Treated/Control Fisher's Exact Test (Meta-Anal) Pval	T1_1/C1_1 117:115 FC	T1_1/C1_1 PVal 117:115	T1_1/T1 117:116 FC	T1_1/T1 PVal 117:116	T3/T2 117:116 FC	T3/T2 PVal 117:116	Avg Treated FC	Fisher's Exact Test (Meta-Anal)	In Treated Fisher's Exact Test (Meta-Anal) Pval
NCBI_Bias2	397	14	44.05	44.05	70.87	69.07	69.07	gi|85682743	RecName: Full=Glyceraldehyde-3-phosphate dehydrogenase; Short=GAPDH; AltName: Full=Peptidyl-cysteine S-nitrosylase GAPDH	BOVIN	37	0.816582	0.66931	0.483059	0.506489	0.649821	0.939606	0.606531	1.38038	0.18157	2.29087	0.134528	5.34564	0.0108264	3.00563	7.15532	0.026649	1.83654	0.0295763	1.09648	0.591151	1.11686	0.54947	1.10667	0.976715	0.606531
Uni_Bias2	68	16	39.03	39.03	72.67	69.07	67.27	sp|P10096|G3P_BOVIN	Glyceraldehyde-3-phosphate dehydrogenase OS=Bos taurus GN=GAPDH PE=1 SV=4	BOVIN	38	0.925312	0.29151	0.47863	0.563494	0.701971	1.56891	0.416862	1.03382	0.435288	2.1677	0.149819	5.24807	0.0150127	2.81653	6.01839	0.043937	1.16676	0.0251764	1.04152	0.373104	1.1272	0.543143	1.08436	1.38651	0.472367
NCBI_Bias2	297	104	14.16	14.42	79.7	69.92	46.62	gi|74354539	Fatty acid binding protein 3, muscle and heart (mammary-derived growth inhibitor) [Bos taurus]	Bos taurus	16	0.765597	0.424087	0.229087	0.529792	0.497342	1.29688	0.472367	1.03753	0.706471	1.39316	0.945968	5.59758	0.65798	2.67609	0.713634	0.6989	1.31826	0.321267	0.972747	0.862745	0.963829	0.902868	0.968288	0.216987	0.882497
Uni_Bias2	504	113	13.79	14.06	79.7	76.69	46.62	tr|C0LSL0|C0LSL0_BOVIN	Heart fatty acid-binding protein OS=Bos taurus GN=H-FABP PE=2 SV=1	BOVIN	15	0.892915	0.0393227	0.285759	0.401651	0.589337	3.60301	0.153355	0.995436	0.925999	1.39316	0.97671	4.57088	0.563103	2.31982	0.586072	0.6989	1.14033	0.0207925	1.02057	0.681202	0.954993	0.809242	0.987781	0.517291	0.7596
NCBI_Bias2	229	7	53.44	53.52	49.45	37.56	34.57	gi|332634826	hypoxia up-regulated protein 1 [Bos taurus]	Bos taurus	31	1.23595	0.387706	1.99526	0.276726	1.6156	1.93889	0.367879	1.64437	0.019122	3.59749	0.0139588	1.65959	0.272433	2.30048	8.27672	0.014264	1.23595	0.180259	0.937562	0.809912	0.879023	0.601157	0.908292	0.625149	0.6989
Uni_Bias2	346	59	21.13	23.39	58.46	46.46	40.92	sp|Q3ZCJ2|AK1A1_BOVIN	Alcohol dehydrogenase [NADP+] OS=Bos taurus GN=AKR1A1 PE=2 SV=1	BOVIN	15	0.987937	0.803225	0.544503	0.401855	0.76622	0.982187	0.606531	1.04297	0.377205	2.1677	0.763811	3.43558	0.849045	2.21542	1.22301	0.535261	1.0404	0.369005	0.983085	0.695769	0.928966	0.805816	0.956026	0.502598	0.7596
Uni_Bias2	130	136	10.8	10.8	81.48	58.52	41.48	sp|P55052|FABP5_BOVIN	Fatty acid-binding protein, epidermal OS=Bos taurus GN=FABP5 PE=1 SV=4	BOVIN	7	0.868906	0.0849061	0.369828	0.141753	0.619367	3.83906	0.135335	0.995751	0.942938	1.34276	0.747224	3.94457	0.290586	2.09436	1.37758	0.472367	1.18615	0.0339308	1.03232	0.59653	1.03753	0.872606	1.03493	0.567099	0.6989
NCBI_Bias2	69	107	13.87	13.87	83.44	77.07	69.43	gi|296478548	ubiquitin C [Bos taurus]	Bos taurus	8	0.794328	0.834771	0.474242	0.85981	0.634285	0.288061	0.8395	1.23595	0.266237	1.52757	0.336045	3.46737	0.232879	2.07696	3.3624	0.173774	1.52757	0.1819	1	0.955835	1.08643	0.930967	1.04321	0.101366	0.9277
NCBI_Bias2	257	57	20.95	21.08	59.08	46.46	40.92	gi|73586501	Aldo-keto reductase family 1, member A1 (aldehyde reductase) [Bos taurus]	Bos taurus	15	0.981748	0.973826	0.660693	0.49067	0.821221	0.641459	0.6989	1.02802	0.567868	2.26986	0.927672	2.83139	0.916162	2.04309	0.632772	0.6989	1.01859	0.644962	0.981748	0.884499	0.879023	0.635453	0.930385	0.500438	0.7596
Uni_Bias2	403	2	82.34	82.34	54.98	49.39	45.29	sp|Q76LV2|HS90A_BOVIN	Heat shock protein HSP 90-alpha OS=Bos taurus GN=HSP90AA1 PE=2 SV=3	BOVIN	79	0.94532	0.404728	0.711214	0.983576	0.828267	0.800058	0.6376	1.06093	0.227467	2.12814	0.301631	2.91072	0.225598	2.03326	3.62054	0.153355	1.12901	0.0279546	1.00361	0.932203	0.946237	0.870762	0.974926	0.181181	0.9048
Uni_Bias2	510	8	53.68	53.74	49.9	38.22	34.53	tr|E1B748|E1B748_BOVIN	Uncharacterized protein OS=Bos taurus GN=HYOU1 PE=3 SV=1	BOVIN	30	1.04179	0.274028	1.77011	0.28836	1.40595	2.20454	0.324652	1.15871	0.000341824	3.16228	0.0257929	1.65959	0.31489	1.99352	11.1131	0.003607	1.08885	0.0225607	0.976537	0.500171	0.903649	0.684515	0.940093	0.930997	0.606531
NCBI_Bias2	403	23	31.89	31.89	64.5	63.91	56.21	gi|86438497	SGT1, suppressor of G2 allele of SKP1 (S. cerevisiae) [Bos taurus]	Bos taurus	18	1.07647	0.746007	1.08643	0.758914	1.08145	0.494129	0.778801	1.44544	0.313755	2.51189	0.29358	1.80302	0.228961	1.92011	3.35184	0.173774	1.21339	0.220285	0.887156	0.926274	0.772681	0.88473	0.829918	0.172899	0.9048
Uni_Bias2	340	25	30.9	33.23	49.93	36.52	29.6	sp|Q3ZCH0|GRP75_BOVIN	Stress-70 protein, mitochondrial OS=Bos taurus GN=HSPA9 PE=2 SV=1	BOVIN	21	0.943896	0.104899	0.340408	0.297949	0.642152	3.01017	0.196912	0.984455	0.648869	1.0666	0.773376	3.46737	0.0307033	1.83947	3.62454	0.153355	1.06567	0.0960226	1.01924	0.578949	1.14815	0.343197	1.0837	1.40363	0.472367
NCBI_Bias2	59	8	51.73	51.9	79.02	68.24	59.02	gi|296476109	protein disulfide-isomerase precursor [Bos taurus]	Bos taurus	35	0.685488	0.34787	0.496592	0.238005	0.59104	2.16399	0.324652	1.25893	0.381561	1.48594	0.239955	2.72898	0.0843534	1.82461	4.22441	0.119433	1.6293	0.198717	0.895365	0.602465	0.895365	0.542823	0.895365	0.970819	0.606531
Uni_Bias2	420	81	17.77	17.83	31.37	24.84	21.79	sp|Q9TRY0|FKBP4_BOVIN	Peptidyl-prolyl cis-trans isomerase FKBP4 OS=Bos taurus GN=FKBP4 PE=1 SV=4	BOVIN	9	1.01751	0.819688	0.744732	0.663449	0.88112	0.529089	0.7596	1.05339	0.482775	1.52757	0.216828	2.85759	0.0183124	1.81285	5.43479	0.063928	1.10174	0.113285	1.061	0.302462	1.40605	0.212989	1.23352	2.38195	0.25284
NCBI_Bias2	277	300	4.05	4.05	33.33	20.11	12.07	gi|74267741	Chromosome 19 open reading frame 10 ortholog [Bos taurus]	Bos taurus	2	1.18032	0.639214	1.30617	0.834041	1.24325	0.546332	0.7596	1.55597	0.222222	2.14783	0.163517	1.69044	0.15008	1.79808	4.52666	0.093014	1.22462	0.319671	0.928966	0.922569	0.963829	0.773336	0.946398	0.293266	0.8395
NCBI_Bias2	321	155	9.09	9.09	75.56	58.52	37.04	gi|75775501	Fatty acid binding protein 5 (psoriasis-associated) [Bos taurus]	Bos taurus	6	0.816582	0.587471	0.487529	0.139693	0.652055	2.17168	0.324652	1.09648	0.783617	1.31826	0.950767	2.91072	0.165943	1.77515	1.81573	0.367879	1.45881	0.308758	1.09648	0.814538	1.10662	0.921445	1.10155	0.249238	0.882497
Uni_Bias2	142	57	21.47	21.47	76.83	69.51	53.05	sp|P62935|PPIA_BOVIN	Peptidyl-prolyl cis-trans isomerase A OS=Bos taurus GN=PPIA PE=1 SV=2	BOVIN	17	1.00949	0.913697	0.444631	0.535357	0.727059	0.621108	0.6989	1.03418	0.558459	1.38038	0.808158	2.75423	0.970032	1.72293	0.717453	0.687289	0.984524	0.83897	0.959106	0.452425	0.903649	0.333289	0.931378	1.64327	0.416862
Uni_Bias2	458	9	52.84	53.26	79.02	67.06	61.18	tr|A6H7J6|A6H7J6_BOVIN	P4HB protein OS=Bos taurus GN=P4HB PE=2 SV=1	BOVIN	37	0.942617	0.0725821	0.515229	0.209759	0.728923	3.6349	0.153355	1.07702	0.0190921	1.44544	0.271993	2.63027	0.0577146	1.71758	7.04661	0.026649	1.13164	0.00320053	0.988347	0.696163	0.912011	0.67492	0.950179	0.656073	0.6989
NCBI_Bias2	241	250	5.16	5.16	33.74	18.93	11.11	gi|508	unnamed protein product [Bos taurus]	Bos taurus	2	0.946237	0.596979	0.724436	0.560944	0.835337	0.950244	0.606531	1.09648	0.369031	2.01372	0.328955	2.01372	0.439508	1.70798	2.54567	0.25284	1.05682	0.501079	0.912011	0.447033	0.758578	0.427959	0.835294	1.43652	0.472367
Uni_Bias2	138	308	4.12	4.12	33.33	20.11	12.07	sp|P62248|CS010_BOVIN	UPF0556 protein C19orf10 homolog OS=Bos taurus PE=2 SV=1	BOVIN	2	1.03597	0.796063	1.45881	0.735987	1.24739	0.464364	0.778801	1.17556	0.531049	2.42103	0.317799	1.49968	0.586218	1.69876	2.00931	0.324652	1.18212	0.545192	1.03992	0.770678	0.912011	0.951229	0.975967	0.269684	0.8395
Uni_Bias2	218	526	1.35	1.35	5.33	3.198	1.706	sp|Q2HJ55|SAM50_BOVIN	Sorting and assembly machinery component 50 homolog OS=Bos taurus GN=SAMM50 PE=2 SV=1	BOVIN	1	0.834084		0.111686	0.165908	0.472885	1.56026	0.416862	0.91772		0.461318	0.308264	3.69828	0.0478395	1.69244	3.66258	0.153355	1.11075		1.00707		0.855067	0.79629	0.931066	0.197858	0.9048
Uni_Bias2	233	24	31.6	31.6	68.34	63.91	56.21	sp|Q2KIK0|SUGT1_BOVIN	Suppressor of G2 allele of SKP1 homolog OS=Bos taurus GN=SUGT1 PE=2 SV=1	BOVIN	19	1.01083	0.866574	0.981748	0.605888	0.996287	0.559605	0.6989	1.09308	0.0614807	2.1677	0.199422	1.75388	0.244824	1.67155	5.04527	0.07244	1.0387	0.599675	0.957754	0.356976	0.794328	0.867405	0.876041	1.01828	0.535261
Uni_Bias2	185	3	75.52	75.52	63.82	60.46	57.1	sp|Q0VCX2|GRP78_BOVIN	78 kDa glucose-regulated protein OS=Bos taurus GN=HSPA5 PE=2 SV=1	BOVIN	73	0.912352	0.0829038	0.359749	0.0687475	0.636051	4.48834	0.105399	0.989376	0.789521	0.895365	0.472012	3.10456	0.207687	1.6631	2.22255	0.324652	1.09796	0.0507346	1.01	0.809421	1.25893	0.54257	1.13446	0.71474	0.6989
NCBI_Bias2	37	1	157.26	157.26	80.67	74.16	71.01	gi|296473282	major vault protein [Bos taurus]	Bos taurus	234	1.19124	0.157536	1.1272	0.206225	1.15922	2.97656	0.22313	1.20226	0.286316	1.85353	0.762604	1.7378	0.123189	1.59787	3.14057	0.196912	1.05682	0.312448	1.05682	0.509702	1.04713	0.412204	1.05197	1.35514	0.472367
Uni_Bias2	348	37	27.37	27.37	46.77	39.87	38.53	sp|Q3ZCJ7|TBA1C_BOVIN	Tubulin alpha-1C chain OS=Bos taurus GN=TUBA1C PE=1 SV=1	BOVIN	19	0.956479	0.68689	0.731139	0.0644659	0.843809	2.70757	0.25284	1.07493	0.082497	1.7378	0.0992899	1.97697	0.016168	1.59657	7.756	0.018316	1.10009	0.232233	0.973822	0.507045	0.862979	0.316377	0.9184	1.5895	0.416862
Uni_Bias2	705	34	28.82	28.88	46.33	31.64	21.5	tr|F1MXX0|F1MXX0_BOVIN	Uncharacterized protein OS=Bos taurus GN=IMMT PE=4 SV=1	BOVIN	15	1.07303	0.128196	2.01372	0.689299	1.54338	2.10743	0.324652	1.08754	0.0463465	2.65461	0.646272	0.990832	0.65063	1.57766	3.42047	0.173774	0.995233	0.910508	0.979306	0.59458	0.704693	0.359069	0.842	1.34122	0.472367
Uni_Bias2	322	78	18.2	18.2	51.39	42.07	40.05	sp|Q3T0R7|THIM_BOVIN	3-ketoacyl-CoA thiolase, mitochondrial OS=Bos taurus GN=ACAA2 PE=2 SV=1	BOVIN	13	0.921334	0.278947	0.672977	0.198974	0.797155	2.51137	0.25284	1.03423	0.751959	1.43219	0.334587	2.208	0.0165468	1.55814	4.76117	0.082085	1.14203	0.097432	1.01396	0.873643	1.08643	0.569303	1.0502	0.606645	0.6989
NCBI_Bias2	459	502	1.67	1.71	2.475	0.4342	0.4342	RRRRRgi|328802689	REVERSED chromodomain-helicase-DNA-binding protein 8 [Bos taurus]	Bos taurus	1	0.903649	0.854912	0.895365	0.835429	0.899507	0.292338	0.8395	1.38038	0.551328	1.47231	0.499784	1.7378	0.387578	1.53017	1.9429	0.367879	1.61436	0.428191	1.05682	0.89089	1.05682	0.893219	1.05682	0.198436	0.9048
NCBI_Bias2	429	274	4.53	4.53	18.87	9.804	6.373	gi|88954168	RAD23 homolog B (S. cerevisiae) [Bos taurus]	Bos taurus	4	0.981748	0.862721	0.963829	0.805595	0.972788	0.316025	0.8395	1.44544	0.439154	1.58489	0.319998	1.52757	0.279347	1.5193	2.81218	0.22313	1.34276	0.436646	0.92045	0.866648	0.92045	0.897223	0.92045	0.218514	0.882497
Uni_Bias2	4	339	3.63	3.63	40.71	32.14	24.29	sp|A0JNQ6|OOEP_BOVIN	Oocyte-expressed protein homolog OS=Bos taurus GN=OOEP PE=2 SV=1	BOVIN	3	1.17307	0.269853	1.1695	0.391551	1.17128	1.95217	0.367879	1.66172	0.100307	1.5417	0.117203	1.33045	0.233663	1.51129	5.12228	0.07244	1.33775	0.142154	0.940963	0.592348	1.00925	0.919968	0.975108	0.527301	0.7596
NCBI_Bias2	139	471	2	2	8.395	1.728	1.728	gi|297465053	PREDICTED: homeobox A13-like [Bos taurus]	Bos taurus	1	0.787046	0.814912	0.946237	0.851677	0.866641	0.317229	0.8395	1.30617	0.81886	1.5417	0.727953	1.67494	0.566729	1.5076	0.942622	0.606531	2.01372	0.550775	1.20226	0.83789	1.02802	0.925894	1.11514	0.220503	0.882497
Uni_Bias2	627	391	2.43	2.48	20.16	16.28	16.28	tr|F1MM83|F1MM83_BOVIN	Uncharacterized protein OS=Bos taurus GN=PGLS PE=4 SV=1	BOVIN	2	0.934338	0.418811	1.49968	0.651029	1.21701	1.12876	0.535261	0.848433	0.196359	2.22844	0.432298	1.43219	0.690882	1.50302	2.46352	0.286505	0.914419	0.374901	1.00431	0.973178	0.963829	0.936089	0.984069	0.0809814	0.9608
Uni_Bias2	386	285	4.63	4.69	37.59	21.8	21.8	sp|Q5E9Z8|LSM1_BOVIN	U6 snRNA-associated Sm-like protein LSm1 OS=Bos taurus GN=LSM1 PE=2 SV=1	BOVIN	3	0.94523	0.804803	0.824138	0.671325	0.884684	0.534756	0.7596	1.50315	0.251691	1.43219	0.470539	1.57036	0.390512	1.5019	2.6698	0.25284	1.46176	0.186208	0.915887	0.582389	0.912011	0.847444	0.913949	0.613352	0.6989
Uni_Bias2	88	6	62.04	72.31	66.15	60.31	57.08	sp|P19120|HSP7C_BOVIN	Heat shock cognate 71 kDa protein OS=Bos taurus GN=HSPA8 PE=1 SV=2	BOVIN	80	0.971558	0.698401	0.666807	0.251708	0.819183	1.51	0.416862	1.03143	0.552938	1.47231	0.259847	1.95884	0.102494	1.48753	3.66382	0.153355	1.06144	0.468443	0.997328	0.969202	0.895365	0.731568	0.946346	0.298662	0.8395
Uni_Bias2	200	199	7.2	7.2	38.93	25.5	25.5	sp|Q1KZG4|FHIT_BOVIN	Bis(5'-adenosyl)-triphosphatase OS=Bos taurus GN=FHIT PE=2 SV=1	BOVIN	7	1.09676	0.404931	2.75423	0.379353	1.92549	1.62715	0.416862	1.04665	0.625147	2.42103	0.580738	0.981748	0.733221	1.48314	1.1496	0.535261	1.00886	0.935917	1.05458	0.57503	1.10662	0.972645	1.0806	0.50471	0.7596
Uni_Bias2	60	270	5.08	5.08	32.51	21.81	15.23	sp|P04973|CLCA_BOVIN	Clathrin light chain A OS=Bos taurus GN=CLTA PE=1 SV=1	BOVIN	3	0.957242	0.506233	0.895365	0.596476	0.926303	1.04011	0.535261	1.09603	0.229284	1.77011	0.203245	1.55597	0.284193	1.47403	3.75599	0.135335	1.04361	0.515626	0.908929	0.176297	0.809096	0.444763	0.859013	2.21125	0.324652
Uni_Bias2	26	72	18.64	18.84	24.72	11.54	7.886	sp|A7MBJ5|CAND1_BOVIN	Cullin-associated NEDD8-dissociated protein 1 OS=Bos taurus GN=CAND1 PE=2 SV=1	BOVIN	10	1.08215	0.127227	1.11686	0.723435	1.09951	2.07204	0.324652	1.27687	0.000825381	1.69044	0.0254552	1.35519	0.113919	1.44083	11.2419	0.003607	1.12958	0.0382906	0.955208	0.306625	0.879023	0.625121	0.917115	1.43486	0.472367
Uni_Bias2	568	80	18.05	18.05	56.82	52.73	52.73	tr|E1BPE9|E1BPE9_BOVIN	Uncharacterized protein OS=Bos taurus PE=4 SV=1	BOVIN	20	1.09607	0.22053	2.96483	0.170012	2.03045	2.85211	0.22313	1.12759	0.24053	2.51189	0.195465	0.672977	0.840117	1.43748	2.80685	0.22313	1.16359	0.443524	1.13113	0.209297	0.787046	0.858459	0.959089	1.49104	0.472367
Uni_Bias2	355	65	20.67	20.95	71.96	58.2	58.2	sp|Q5E946|PARK7_BOVIN	Protein DJ-1 OS=Bos taurus GN=PARK7 PE=2 SV=1	BOVIN	12	0.961457	0.680423	0.654636	0.600961	0.808047	0.77675	0.6703	1.01588	0.811474	1.78649	0.50955	1.49968	0.923429	1.43402	0.83627	0.6376	0.998957	0.989253	0.943028	0.251422	0.554626	0.286683	0.748827	2.28439	0.25284
NCBI_Bias2	5	116	13.25	13.25	65.37	42.93	38.05	gi|120419448	RAB1A, member RAS oncogene family [Bos taurus]	Bos taurus	7	0.92045	0.348971	0.57544	0.313249	0.747945	1.92264	0.367879	1.04713	0.485096	1.31826	0.586886	1.92309	0.296542	1.42949	2.14707	0.324652	1.08643	0.251294	0.954993	0.641512	0.816582	0.614229	0.885787	0.80893	0.6376
Uni_Bias2	48	331	4	4	18.66	18.66	18.66	sp|P00171|CYB5_BOVIN	Cytochrome b5 OS=Bos taurus GN=CYB5A PE=1 SV=3	BOVIN	2	1.19388	0.354111	1.1272	0.713869	1.16054	1.19448	0.535261	1.48397	0.171195	1.5417	0.358012	1.25893	0.620107	1.4282	2.84029	0.22313	1.15596	0.416823	0.927869	0.782833	0.92045	0.744192	0.924159	0.469292	0.778801
Uni_Bias2	56	433	2.03	2.03	27.14	17.14	10	sp|P02584|PROF1_BOVIN	Profilin-1 OS=Bos taurus GN=PFN1 PE=1 SV=2	BOVIN	2	1.36939		1.34276	0.583612	1.35608	0.467751	0.778801	1.5434		1.61436	0.427483	1.07647	0.867143	1.41141	0.861982	0.6376	1.00839		0.892518		0.887156	0.826219	0.889837	0.16581	0.9048
NCBI_Bias2	309	266	4.78	4.82	40.6	21.8	16.54	gi|75057871	RecName: Full=U6 snRNA-associated Sm-like protein LSm1	BOVIN	3	0.855067	0.714666	0.83946	0.691916	0.847263	0.611688	0.6989	1.30617	0.615241	1.38038	0.550635	1.51356	0.44965	1.40004	1.63443	0.416862	1.40605	0.509272	0.92045	0.874251	0.92045	0.870771	0.92045	0.23692	0.882497
Uni_Bias2	133	143	10.3	10.4	72.55	54.9	53.92	sp|P61603|CH10_BOVIN	10 kDa heat shock protein, mitochondrial OS=Bos taurus GN=HSPE1 PE=2 SV=2	BOVIN	6	1.06457	0.283888	1.30617	0.283364	1.18537	2.18902	0.324652	1.10144	0.117441	1.88799	0.0901619	1.20226	0.959795	1.39723	3.98596	0.135335	0.983765	0.770345	0.948552	0.361718	0.809096	0.420694	0.878824	1.63533	0.416862
Uni_Bias2	156	273	4.94	4.94	35.65	35.65	35.65	sp|P80177|MIF_BOVIN	Macrophage migration inhibitory factor OS=Bos taurus GN=MIF PE=1 SV=6	BOVIN	4	0.671931	0.155937	0.660693	0.481755	0.666312	2.24845	0.324652	1.13946	0.426369	1.21339	0.697346	1.78649	0.369801	1.37978	1.91759	0.367879	1.69444	0.132574	0.997319	0.990532	0.972747	0.967926	0.985033	0.0365788	0.9802
Uni_Bias2	216	46	22.69	22.69	60.19	54.03	45.5	sp|Q29RZ0|THIL_BOVIN	Acetyl-CoA acetyltransferase, mitochondrial OS=Bos taurus GN=ACAT1 PE=2 SV=1	BOVIN	14	1.0924	0.15149	1.28233	0.35717	1.18737	2.53348	0.25284	1.1201	0.0417443	1.59956	0.0215266	1.35519	0.108654	1.35828	8.02077	0.016163	0.997837	0.974128	0.971031	0.525757	1.08643	0.976547	1.02873	0.579044	0.6989
NCBI_Bias2	317	400	2.1	5.73	66.29	50.56	44.94	gi|75773409	DYNLL2 protein [Bos taurus]	Bos taurus	4	1.1272	0.615256	1.01859	0.962406	1.07289	0.455172	0.778801	1.49968	0.218187	1.33045	0.58473	1.15878	0.760656	1.32964	2.02605	0.324652	1.22462	0.531843	0.937562	0.790855	0.879023	0.808635	0.908292	0.388301	0.7985
NCBI_Bias2	293	142	9.99	10.08	72.55	54.9	53.92	gi|74354139	Heat shock 10kDa protein 1 (chaperonin 10) [Bos taurus]	Bos taurus	6	1.04713	0.454782	1.49968	0.283902	1.27341	1.77806	0.367879	1.05682	0.356937	1.95884	0.123229	0.946237	0.820194	1.32063	2.88556	0.22313	0.963829	0.707452	0.954993	0.575197	0.717794	0.426235	0.836393	1.22107	0.535261
Uni_Bias2	324	157	9.35	9.35	31.44	18.26	10.48	sp|Q3T145|MDHC_BOVIN	Malate dehydrogenase, cytoplasmic OS=Bos taurus GN=MDH1 PE=2 SV=3	BOVIN	5	1.10123	0.0934052	1.33045	0.232685	1.21584	3.32572	0.173774	1.10026	0.0966538	1.78649	0.16957	1.05682	0.749087	1.31452	3.8218	0.135335	0.956916	0.552751	0.9553	0.396665	0.809096	0.59765	0.882198	1.25026	0.472367
Uni_Bias2	660	137	10.68	10.84	43.04	38.26	32.61	tr|F1MT96|F1MT96_BOVIN	Uncharacterized protein (Fragment) OS=Bos taurus GN=CLIC4 PE=4 SV=1	BOVIN	7	0.989111	0.90438	0.887156	0.739722	0.938133	0.349161	0.8395	1.04539	0.467248	1.39316	0.428117	1.49968	0.370034	1.31274	2.2613	0.286505	1.02709	0.776952	0.969709	0.609019	0.954993	0.826629	0.962351	0.596117	0.6989
NCBI_Bias2	267	141	10.2	10.31	37.15	34.78	29.64	gi|73587123	Chloride intracellular channel 4 [Bos taurus]	Bos taurus	7	0.981748	0.56172	0.895365	0.765862	0.938556	0.732659	0.687289	1.02802	0.823002	1.41906	0.414966	1.48594	0.387764	1.311	1.75604	0.367879	1.02802	0.43736	0.981748	0.98781	0.946237	0.806419	0.963993	0.197532	0.9048
NCBI_Bias2	155	76	17.96	17.96	80.37	75.39	75.39	gi|297478374	PREDICTED: oocyte expressed protein homolog [Bos taurus]	Bos taurus	17	1.58489	0.355687	2.75423	0.331718	2.16956	1.85633	0.367879	1.31826	0.659873	1.95884	0.465869	0.630957	0.662343	1.30269	1.38238	0.472367	0.809096	0.643501	1.00925	0.910126	0.879023	0.724478	0.944138	0.361747	0.7985
NCBI_Bias2	443	18	35.53	35.53	62.69	49.24	45.08	gi|94574271	ATP synthase, H+ transporting, mitochondrial F1 complex, beta polypeptide [Bos taurus]	Bos taurus	32	0.591562	0.0782827	0.586138	0.0874056	0.58885	4.32959	0.105399	0.990832	0.98098	1.14815	0.508226	1.7378	0.0766483	1.29226	2.83556	0.22313	1.49968	0.216196	0.895365	0.579522	0.895365	0.553742	0.895365	0.987245	0.606531
Uni_Bias2	114	45	23.83	25.98	44.06	24.61	19.62	sp|P31976|EZRI_BOVIN	Ezrin OS=Bos taurus GN=EZR PE=1 SV=2	BOVIN	13	1.05212	0.236511	1.18032	0.535412	1.11622	1.79492	0.367879	1.06456	0.15061	1.55597	0.198897	1.24738	0.670412	1.2893	3.39435	0.173774	1.00278	0.946759	0.988606	0.783289	0.972747	0.773578	0.980677	0.435148	0.7985
Uni_Bias2	350	493	1.93	1.93	27.96	10.75	10.75	sp|Q3ZCL8|SH3L3_BOVIN	SH3 domain-binding glutamic acid-rich-like protein 3 OS=Bos taurus GN=SH3BGRL3 PE=3 SV=1	BOVIN	1	0.925856		0.903649	0.854105	0.914753	0.136977	0.9277	1.13609		1.19124	0.717366	1.52757	0.468596	1.28497	0.946922	0.606531	1.42982		1.1624		1.15878	0.760527	1.16059	0.237771	0.882497
NCBI_Bias2	147	173	8.09	15.91	44.25	25.28	18.31	gi|297474462	PREDICTED: keratin 2-like [Bos taurus]	Bos taurus	16	1.1272	0.785108	1.25893	0.566568	1.19306	0.703637	0.6989	1.45881	0.491948	1.35519	0.400758	1.03753	0.779753	1.28384	1.62648	0.416862	1.21339	0.680174	0.946237	0.920684	0.954993	0.872842	0.950615	0.189907	0.9048
NCBI_Bias2	411	74	18.55	18.55	50.45	40.24	36.34	gi|86823828	Electron-transfer-flavoprotein, alpha polypeptide [Bos taurus]	Bos taurus	9	0.954993	0.293937	0.717794	0.319145	0.836393	2.05551	0.324652	0.981748	0.775259	1.25893	0.357268	1.58489	0.12878	1.27519	2.89542	0.22313	1.00925	0.696767	0.981748	0.697186	0.92045	0.738719	0.951099	0.576344	0.6989
Uni_Bias2	401	133	11.16	59.95	48.07	41.3	34.94	sp|Q76LV1|HS90B_BOVIN	Heat shock protein HSP 90-beta OS=Bos taurus GN=HSP90AB1 PE=2 SV=3	BOVIN	52	0.923219	0.292474	0.895365	0.762719	0.909292	1.3031	0.472367	1.08847	0.265922	1.35519	0.205134	1.38038	0.303699	1.27468	3.56153	0.153355	1.14221	0.113361	0.966255	0.627407	0.903649	0.562785	0.934952	0.904216	0.606531
Uni_Bias2	276	442	2.01	8.34	66.29	50.56	50.56	sp|Q3MHR3|DYL2_BOVIN	Dynein light chain 2, cytoplasmic OS=Bos taurus GN=DYNLL2 PE=3 SV=1	BOVIN	5	1.05767	0.538009	1.01859	0.948672	1.03813	0.584189	0.6989	1.26413	0.062736	1.33045	0.564199	1.22462	0.663758	1.27307	3.25808	0.173774	1.14634	0.187632	0.956663	0.619854	0.937562	0.903992	0.947112	0.503093	0.7596
Uni_Bias2	52	20	33.89	33.89	52.46	49.24	45.08	sp|P00829|ATPB_BOVIN	ATP synthase subunit beta, mitochondrial OS=Bos taurus GN=ATP5B PE=1 SV=2	BOVIN	33	0.86917	0.0108697	0.780764	0.0768921	0.824967	6.1558	0.049787	0.963322	0.366358	1.13763	0.546678	1.70608	0.0709413	1.26901	3.69493	0.153355	1.09675	0.0701056	0.986546	0.704135	0.879023	0.575127	0.932784	0.78516	0.6703
Uni_Bias2	248	68	19.62	22.09	25.1	22.01	20.21	sp|Q2T9P4|NASP_BOVIN	Nuclear autoantigenic sperm protein OS=Bos taurus GN=NASP PE=2 SV=2	BOVIN	13	1.11901	0.0196818	1.51356	0.183906	1.31628	4.88268	0.082085	1.05003	0.53023	1.6293	0.19348	1.11686	0.737314	1.2654	2.24249	0.324652	0.979646	0.630786	1.04248	0.34036	1.03753	0.713634	1.04	1.22917	0.535261
Uni_Bias2	586	320	4.03	4.04	21.12	4.612	4.612	tr|F1MEM9|F1MEM9_BOVIN	Uncharacterized protein (Fragment) OS=Bos taurus GN=TTC19 PE=4 SV=1	BOVIN	2	1.25775	0.516702	1.19124	0.619599	1.2245	0.989299	0.606531	1.31293	0.280656	1.35519	0.452377	1.10662	0.753425	1.25825	2.03857	0.324652	1.01629	0.928234	0.972301	0.824818	0.972747	0.953235	0.972524	0.208883	0.882497
Uni_Bias2	778	389	2.47	2.47	17.81	8.142	3.053	tr|Q0VD16|Q0VD16_BOVIN	MAP2K1 protein OS=Bos taurus GN=MAP2K1 PE=2 SV=2	BOVIN	1	1.22294	0.272338	1.18032	0.271365	1.20163	2.26268	0.286505	1.34377	0.227709	1.39316	0.119428	1.00925	0.917136	1.24873	3.20616	0.196912	0.946357	0.607046	0.858769	0.23437	0.855067	0.420491	0.856918	2.01268	0.324652
NCBI_Bias2	177	307	4.01	4.01	26.3	7.671	5.205	gi|297486858	PREDICTED: tetratricopeptide repeat domain 19 [Bos taurus]	Bos taurus	2	1.1695	0.57429	1.19124	0.612963	1.18037	0.90687	0.606531	1.25893	0.458007	1.35519	0.448643	1.10662	0.759873	1.24025	1.61297	0.416862	1.04713	0.831905	0.972747	0.948573	0.963829	0.946727	0.968288	0.0934091	0.9512
Uni_Bias2	31	401	2.18	2.19	8.824	4.085	2.778	sp|O19094|OCTC_BOVIN	Peroxisomal carnitine O-octanoyltransferase OS=Bos taurus GN=CROT PE=1 SV=1	BOVIN	1	1.29442		1.23595	0.469344	1.26519	0.657017	0.6989	1.72525		1.09648	0.684125	0.895365	0.723468	1.23903	0.61089	0.6989	1.30853		0.979374		1.00925	0.939078	0.994314	0.0545965	0.9704
Uni_Bias2	589	7	59.54	59.54	56.49	46.31	43.84	tr|F1MEQ0|F1MEQ0_BOVIN	Uncharacterized protein OS=Bos taurus GN=ALB PE=4 SV=1	BOVIN	39			1.8197	0.362618	1.8197	0.881101	0.6376			1.72187	0.39199	0.744732	0.599551	1.2333	1.2578	0.472367					0.787046	0.665617	0.787046	0.353551	0.7985
Uni_Bias2	870	506	1.74	1.74	18.07	8.434	8.434	tr|Q862H6|Q862H6_BOVIN	Similar to ATP synthase proteolipid P2 (Fragment) OS=Bos taurus PE=2 SV=1	BOVIN	1	1.04266		1.00925	0.964942	1.02595	0.0309972	0.9851	1.28488		1.19124	0.792748	1.21339	0.783352	1.22984	0.413815	0.7985	1.26921		1.02744		1.02802	0.954465	1.02773	0.0404801	0.9802
Uni_Bias2	727	458	2	2.02	13.12	10.63	10.63	tr|F1N0N6|F1N0N6_BOVIN	Uncharacterized protein OS=Bos taurus GN=C3H1orf123 PE=4 SV=1	BOVIN	1	1.15201		1.1272	0.799929	1.1396	0.193897	0.9048	1.30316		1.36773	0.560429	1	0.983721	1.22363	0.517214	0.7596	0.937504		0.826748		0.824138	0.717423	0.825443	0.288449	0.8395
Uni_Bias2	170	507	1.73	1.74	16.98	4.509	2.653	sp|Q05B89|NIF3L_BOVIN	NIF3-like protein 1 OS=Bos taurus GN=NIF3L1 PE=2 SV=1	BOVIN	1	0.890322	0.761182	0.794328	0.640013	0.842325	0.624645	0.6989	1.15711	0.778647	1.07647	0.843077	1.43219	0.474772	1.22192	1.01261	0.535261	1.32389	0.22167	1.01444	0.93426	1.05682	0.876558	1.03563	0.173503	0.9048
Uni_Bias2	794	369	2.9	2.94	15.67	6.221	6.221	tr|Q1RML6|Q1RML6_BOVIN	tRNA nucleotidyl transferase, CCA-adding, 1 OS=Bos taurus GN=TRNT1 PE=2 SV=1	BOVIN	2	1.12959	0.519867	1.10662	0.689167	1.1181	0.891565	0.6376	1.25367	0.114211	1.31826	0.3458	1.08643	0.728312	1.21945	3.0823	0.196912	1.02374	0.82262	0.920673	0.427941	0.912011	0.752328	0.916342	0.984418	0.606531
Uni_Bias2	171	440	2.02	2.02	6.25	4.297	4.297	sp|Q08D83|RTN3_BOVIN	Reticulon-3 OS=Bos taurus GN=RTN3 PE=2 SV=1	BOVIN	1	1.23368		1.20226	0.704822	1.21797	0.303841	0.8395	1.23241		1.2942	0.618295	1.08643	0.858046	1.20434	0.550587	0.6989	1.01431		1.01289		1.00925	0.972483	1.01107	0.0242364	0.9864
Uni_Bias2	562	36	28.19	28.19	43.72	26.43	24.14	tr|E1BNB4|E1BNB4_BOVIN	Uncharacterized protein OS=Bos taurus GN=PABPC1L PE=4 SV=1	BOVIN	15	1.00225	0.966465	0.903649	0.730766	0.95295	0.302071	0.8395	1.04565	0.287425	1.22462	0.29899	1.33045	0.165693	1.20024	3.69303	0.153355	1.03038	0.570865	0.984625	0.710941	0.981748	0.975927	0.983187	0.317499	0.8395
NCBI_Bias2	237	440	2.01	2.01	26.16	4.641	4.641	gi|38327594	TPA_inf: RTN3 [Bos taurus]	Bos taurus	1	1.22462	0.683861	1.21339	0.700068	1.219	0.639784	0.6989	1.22462	0.685963	1.2942	0.616435	1.07647	0.865707	1.19843	0.872883	0.6376	1	0.977594	1.00925	0.974885	1.00925	0.977278	1.00925	0.0420568	0.9802
Uni_Bias2	34	491	2	2	6.803	6.803	6.803	sp|O46375|TTHY_BOVIN	Transthyretin OS=Bos taurus GN=TTR PE=1 SV=1	BOVIN	1	1.01222	0.922247	0.981748	0.991515	0.996985	0.0777072	0.9608	1.08532	0.559666	1.24738	0.664384	1.24738	0.662313	1.19336	1.21718	0.535261	1.07111	0.613442	0.996811	0.979429	0.990832	0.994292	0.993821	0.0230262	0.9864
Uni_Bias2	80	511	1.68	1.69	23.44	3.125	3.125	sp|P13619|AT5F1_BOVIN	ATP synthase subunit b, mitochondrial OS=Bos taurus GN=ATP5F1 PE=1 SV=2	BOVIN	1	0.948025		0.928966	0.891054	0.938495	0.100192	0.9277	1.10409		1.15878	0.756316	1.30617	0.606638	1.18968	0.676734	0.6989	1.22588		1.05004		1.04713	0.914403	1.04859	0.0777243	0.9656
Uni_Bias2	506	501	1.85	1.85	14.43	5.97	5.97	tr|C3V9V7|C3V9V7_BOVIN	RNP24 OS=Bos taurus PE=3 SV=1	BOVIN	1	0.871681		0.855067	0.76476	0.863374	0.23295	0.882497	1.11164		1.1695	0.74683	1.27057	0.635059	1.18391	0.647929	0.6989	1.19501		0.934769		0.928966	0.897878	0.931868	0.0935655	0.9512
NCBI_Bias2	141	508	1.57	1.57	13.93	5.97	5.97	gi|297470943	PREDICTED: coated vesicle membrane protein-like [Bos taurus]	Bos taurus	1	0.862979	0.788254	0.855067	0.769963	0.859023	0.433728	0.7985	1.10662	0.829651	1.1695	0.744508	1.27057	0.640761	1.18223	0.805078	0.6376	1.18032	0.728678	0.928966	0.895534	0.928966	0.893203	0.928966	0.193936	0.9048
Uni_Bias2	796	284	4.66	4.67	10.78	4.647	4.647	tr|Q1RMR3|Q1RMR3_BOVIN	Cortactin OS=Bos taurus GN=CTTN PE=2 SV=1	BOVIN	3	1.14045	0.255611	1.11686	0.563	1.12865	1.68382	0.416862	1.17668	0.190512	1.21339	0.362028	1.13763	0.532611	1.1759	2.86985	0.22313	1.07781	0.461594	1.04224	0.667785	1.03753	0.817075	1.03989	0.526203	0.7596
Uni_Bias2	389	287	4.6	4.6	16.24	6.962	5.274	sp|Q5EAC2|GSHB_BOVIN	Glutathione synthetase OS=Bos taurus GN=GSS PE=2 SV=1	BOVIN	3	0.911142	0.521596	0.887156	0.798531	0.899149	0.760748	0.6703	1.09504	0.529129	1.14815	0.734604	1.27057	0.592633	1.17125	1.2752	0.472367	1.18797	0.333765	0.986061	0.91078	0.981748	0.98349	0.983904	0.0956331	0.9512
Uni_Bias2	160	99	15.12	15.12	59.47	46.26	44.05	sp|P80724|BASP1_BOVIN	Brain acid soluble protein 1 OS=Bos taurus GN=BASP1 PE=1 SV=3	BOVIN	10	1.16227	0.0566985	1.14815	0.38578	1.15521	3.32018	0.173774	1.19336	0.0179463	1.24738	0.128186	1.0666	0.465946	1.16911	5.93969	0.051	1.01189	0.847864	0.982836	0.820256	0.981748	0.961401	0.982292	0.206292	0.882497
Uni_Bias2	226	333	3.92	3.92	52.8	36.8	19.2	sp|Q2HJH9|PDCD5_BOVIN	Programmed cell death protein 5 OS=Bos taurus GN=PDCD5 PE=2 SV=3	BOVIN	2	0.860955	0.396847	0.816582	0.614256	0.838769	1.22606	0.535261	1.02497	0.869046	1.10662	0.772896	1.36773	0.440981	1.16644	1.05683	0.535261	1.24389	0.291139	1.04265	0.761379	1.00925	0.911788	1.02595	0.317011	0.8395
Uni_Bias2	304	505	1.77	1.77	12.67	3.62	3.62	sp|Q3T083|SDF2L_BOVIN	Stromal cell-derived factor 2-like protein 1 OS=Bos taurus GN=SDF2L1 PE=2 SV=1	BOVIN	1	0.74058		0.724436	0.569016	0.732508	0.489751	0.778801	0.963242		1.00925	0.965656	1.51356	0.472459	1.16202	0.681628	0.6989	1.42236		1.09091		1.08643	0.854386	1.08867	0.136691	0.9277
NCBI_Bias2	157	336	3.23	3.26	11.42	1.589	1.589	gi|297478648	PREDICTED: erythrocyte membrane protein band 4.1-like 2 [Bos taurus]	Bos taurus	2	0.972747	0.923169	0.963829	0.897152	0.968288	0.163706	0.9048	1.11686	0.516765	1.19124	0.416972	1.1695	0.469302	1.1592	1.9903	0.367879	1.07647	0.637241	0.937562	0.766863	0.937562	0.808734	0.937562	0.414953	0.7985
NCBI_Bias2	175	24	30.8	30.86	30.42	21.23	17.65	gi|297486216	PREDICTED: NLR family, pyrin domain containing 8 [Bos taurus]	Bos taurus	20	1.61436	0.0653432	1.70608	0.0549086	1.66022	4.89032	0.082085	1.45881	0.313661	1.38038	0.270615	0.636796	0.000654023	1.15866	8.51119	0.012588	0.717794	0.0251649	0.801678	0.187645	0.758578	0.212404	0.780128	2.799	0.22313
Uni_Bias2	71	117	12.68	12.68	58.52	58.52	58.52	sp|P11116|LEG1_BOVIN	Galectin-1 OS=Bos taurus GN=LGALS1 PE=1 SV=2	BOVIN	7	1.05521	0.66192	1.03753	0.916127	1.04637	0.434478	0.7985	1.11262	0.479969	1.31826	0.0600224	1.02802	0.59746	1.15297	3.52833	0.153355	0.961486	0.735031	0.910367	0.479963	0.816582	0.165993	0.863475	2.19741	0.324652
NCBI_Bias2	215	393	2.19	2.19	9.114	4.557	4.557	gi|329663412	choline/ethanolamine kinase [Bos taurus]	Bos taurus	2	1.00925	0.905581	1	0.915565	1.00463	0.162766	0.9048	1.14815	0.750367	1.21339	0.658113	1.09648	0.814734	1.15267	0.790821	0.6703	1.02802	0.933253	0.903649	0.899681	0.903649	0.897461	0.903649	0.185791	0.9048
NCBI_Bias2	111	130	11.52	11.55	16.42	10.86	8.395	gi|296486304	transforming, acidic coiled-coil containing protein 3 [Bos taurus]	Bos taurus	7	1	0.871326	0.990832	0.924847	0.995416	0.1875	0.9048	1.04713	0.482171	1.23595	0.156194	1.1695	0.321668	1.15086	3.23145	0.196912	1.02802	0.762685	0.972747	0.805643	0.946237	0.705515	0.959492	0.490702	0.778801
Uni_Bias2	606	521	1.44	1.49	8	3.273	3.273	tr|F1MIE7|F1MIE7_BOVIN	Uncharacterized protein OS=Bos taurus GN=STX12 PE=4 SV=1	BOVIN	1	0.770824		0.751623	0.610586	0.761223	0.428506	0.7985	0.999046		1.04713	0.906935	1.40605	0.537752	1.15074	0.623684	0.6989	1.31393		1.0113		1.00925	0.975032	1.01028	0.0219626	0.9864
Uni_Bias2	328	351	3.27	3.27	33.65	23.08	16.35	sp|Q3ZBD3|PHS_BOVIN	Pterin-4-alpha-carbinolamine dehydratase OS=Bos taurus GN=PCBD1 PE=3 SV=2	BOVIN	2	0.936171	0.544731	0.912011	0.788913	0.924091	0.733577	0.687289	1.12515	0.323828	1.08643	0.892829	1.23595	0.594044	1.14917	1.5302	0.416862	1.29613	0.105674	1.07565	0.508697	1.03753	0.880404	1.05659	0.697719	0.6989
NCBI_Bias2	211	327	3.55	3.68	26.43	7.709	4.626	gi|300798484	mitochondrial import inner membrane translocase subunit TIM44 [Bos taurus]	Bos taurus	2	1	0.981294	0.981748	0.97534	0.990874	0.0380899	0.9827	1.08643	0.698882	1.15878	0.544274	1.20226	0.464965	1.14916	1.50472	0.416862	1.11686	0.627018	1.01859	0.895647	1.01859	0.903793	1.01859	0.183588	0.9048
Uni_Bias2	517	84	17.38	23.96	44.7	25.94	20.39	tr|E1B991|E1B991_BOVIN	Uncharacterized protein OS=Bos taurus GN=KRT2 PE=3 SV=1	BOVIN	20	0.945875	0.631976	1.04713	0.800174	0.996502	0.592229	0.6989	1.20522	0.0889729	1.1695	0.413342	1.0666	0.840388	1.14711	3.01991	0.196912	1.15226	0.137194	0.900459	0.189954	0.946237	0.71049	0.923348	1.73959	0.416862
Uni_Bias2	530	361	3.02	3.07	16.48	1.598	1.598	tr|E1BDB0|E1BDB0_BOVIN	Uncharacterized protein OS=Bos taurus GN=EPB41L2 PE=4 SV=1	BOVIN	2	1.03872	0.64232	1.00925	0.937929	1.02399	0.440157	0.7985	1.1347	0.175762	1.13763	0.511454	1.15878	0.454931	1.1437	2.77664	0.22313	1.10333	0.259358	1.00707	0.941191	1.02802	0.849326	1.01755	0.194496	0.9048
NCBI_Bias2	245	514	1.37	1.39	14.72	4.061	4.061	gi|6174770	phospholipid hydroperoxide glutathione peroxidase [Bos taurus]	Bos taurus	1	0.946237	0.903373	0.928966	0.881967	0.937602	0.197361	0.9048	1.09648	0.813035	1.15878	0.725564	1.1695	0.715064	1.14158	0.749741	0.687289	1.08643	0.82498	0.937562	0.890745	0.937562	0.894395	0.937562	0.197435	0.9048
Uni_Bias2	310	495	1.92	1.92	11.76	11.76	11.76	sp|Q3T0E0|ATOX1_BOVIN	Copper transport protein ATOX1 OS=Bos taurus GN=ATOX1 PE=3 SV=1	BOVIN	1	0.845448		0.824138	0.722714	0.834793	0.282067	0.8395	1.01021		1.05682	0.889328	1.35519	0.568081	1.14074	0.593055	0.6989	1.27252		1.06239		1.05682	0.895816	1.0596	0.0955624	0.9512
NCBI_Bias2	275	513	1.38	1.38	11.76	11.76	11.76	gi|74267675	ATOX1 protein [Bos taurus]	Bos taurus	1	0.83946	0.744967	0.831764	0.727635	0.835612	0.531899	0.7596	1	0.981089	1.0666	0.886676	1.35519	0.57298	1.1406	0.604774	0.6989	1.25893	0.649182	1.05682	0.89816	1.05682	0.900497	1.05682	0.184328	0.9048
NCBI_Bias2	269	388	2.26	2.26	24.48	16.78	4.895	gi|73587149	PCBD1 protein [Bos taurus]	Bos taurus	1	0.92045	0.733713	0.895365	0.774715	0.907907	0.490664	0.778801	1.08643	0.689712	1.10662	0.762575	1.22462	0.549601	1.13922	1.078	0.535261	1.24738	0.427547	1.04713	0.904926	0.990832	0.971191	1.01898	0.112164	0.9277
NCBI_Bias2	161	204	6.7	6.7	14.96	10.43	8.174	gi|297480017	PREDICTED: protein associated with topoisomerase II homolog 2-like [Bos taurus]	Bos taurus	3	0.990832	0.758632	0.990832	0.712449	0.990832	0.53443	0.7596	1.08643	0.591519	1.15878	0.403342	1.1695	0.248188	1.13823	2.45515	0.286505	1.09648	0.428278	1	0.976819	1	0.984175	1	0.0342269	0.9827
Uni_Bias2	764	242	6	6	30.77	24.73	24.73	tr|Q05B85|Q05B85_BOVIN	Hematological and neurological expressed 1-like OS=Bos taurus GN=HN1L PE=2 SV=1	BOVIN	3	1.12224	0.404875	1.08643	0.596431	1.10433	1.23424	0.535261	1.2072	0.284098	1.1272	0.480762	1.07647	0.627823	1.13695	2.13353	0.324652	1.01877	0.872949	0.94552	0.673567	1.03753	0.771687	0.991524	0.568357	0.6989
Uni_Bias2	305	164	9.05	9.05	38.93	34.23	34.23	sp|Q3T0C7|STMN1_BOVIN	Stathmin OS=Bos taurus GN=STMN1 PE=2 SV=3	BOVIN	5	1.06544	0.47358	0.981748	0.986252	1.02359	0.661237	0.6989	1.1539	0.161434	1.1695	0.599672	1.07647	0.779164	1.13329	2.24492	0.324652	1.00023	0.997824	0.921099	0.365278	0.912011	0.781244	0.916555	1.08918	0.535261
Uni_Bias2	874	498	1.9	1.9	35.8	9.877	9.877	tr|Q862J2|Q862J2_BOVIN	Similar to phospholipid hydroperoxide glutathione peroxidase (Fragment) OS=Bos taurus PE=2 SV=1	BOVIN	1	0.943719	0.662626	0.954993	0.943853	0.949356	0.407654	0.7985	1.10131	0.507828	1.18032	0.735756	1.11686	0.812871	1.13283	1.03506	0.535261	1.10752	0.489789	0.946756	0.67836	0.903649	0.858265	0.925203	0.469837	0.778801
Uni_Bias2	754	218	6.6	6.6	19.35	11.49	9.004	tr|F1N6C5|F1N6C5_BOVIN	Uncharacterized protein (Fragment) OS=Bos taurus GN=PATL2 PE=4 SV=1	BOVIN	3	0.952872	0.585909	0.981748	0.696402	0.96731	0.77862	0.6703	1.05741	0.459335	1.15878	0.406901	1.18032	0.238531	1.13217	2.70167	0.25284	1.13272	0.140278	1.0179	0.80663	1.00925	0.970957	1.01358	0.212251	0.882497
NCBI_Bias2	249	479	2	2	4.805	2.288	2.288	gi|67472687	RecName: Full=Septin-7; AltName: Full=CDC10 protein homolog	BOVIN	1	1.05682	0.902829	1.03753	0.923128	1.04717	0.158265	0.9048	1.1272	0.800247	1.19124	0.717854	1.07647	0.863632	1.13163	0.608822	0.6989	1.00925	0.975426	0.937562	0.916426	0.937562	0.914071	0.937562	0.153846	0.9048
Uni_Bias2	214	141	10.46	10.54	29.83	17.38	15.45	sp|Q29RK1|CISY_BOVIN	Citrate synthase, mitochondrial OS=Bos taurus GN=CS PE=2 SV=1	BOVIN	9	1.02423	0.757659	1.03753	0.749878	1.03088	0.491072	0.778801	1.13802	0.0625618	1.18032	0.219134	1.07647	0.534885	1.1316	4.26944	0.105399	1.0931	0.39555	0.98109	0.749212	0.946237	0.716946	0.963664	0.539817	0.7596
NCBI_Bias2	263	311	4	4	33.68	18.95	18.95	gi|73586584	SUMO2 protein [Bos taurus]	Bos taurus	2	0.870964	0.763153	0.862979	0.752939	0.866971	0.481258	0.778801	1.00925	0.951113	1.0666	0.845952	1.30617	0.570576	1.12734	0.676216	0.6989	1.21339	0.645176	1.04713	0.901407	1.04713	0.90893	1.04713	0.173098	0.9048
Uni_Bias2	364	403	2.16	2.17	10.9	4.521	2.394	sp|Q5E964|PSD13_BOVIN	26S proteasome non-ATPase regulatory subunit 13 OS=Bos taurus GN=PSMD13 PE=2 SV=1	BOVIN	1	0.961217	0.70678	0.954993	0.840252	0.958105	0.452612	0.778801	1.10331	0.347573	1.14815	0.506885	1.1272	0.536472	1.12622	2.049	0.324652	1.06901	0.495291	0.928922	0.457558	0.937562	0.798681	0.933242	0.874361	0.6376
Uni_Bias2	696	77	18.32	18.32	47.75	40.24	36.34	tr|F1MWR3|F1MWR3_BOVIN	Uncharacterized protein OS=Bos taurus GN=ETFA PE=4 SV=1	BOVIN	9	0.952405	0.66869	0.83946	0.307005	0.895932	1.37526	0.472367	0.981338	0.877877	1.07647	0.507612	1.31826	0.0982747	1.12535	2.71719	0.25284	1.01728	0.849422	0.985639	0.855665	1.02802	0.933375	1.00683	0.19528	0.9048
Uni_Bias2	558	262	5.29	5.29	41.9	41.9	41.9	tr|E1BL51|E1BL51_BOVIN	Uncharacterized protein OS=Bos taurus PE=4 SV=1	BOVIN	4	1.06273	0.499653	1.05682	0.80195	1.05977	0.79437	0.6703	1.08337	0.425002	1.1695	0.398323	1.11686	0.437295	1.12324	2.2612	0.286505	1.05298	0.532517	1.03038	0.709969	1.00925	0.864878	1.01982	0.423612	0.7985
NCBI_Bias2	453	165	8.7	60.77	48.2	39.78	34.94	gi|95767684	heat shock 90kDa protein 1, beta [Bos taurus]	Bos taurus	54	0.963829	0.696975	0.928966	0.684025	0.946398	0.643421	0.6989	1.0666	0.433331	1.1272	0.455293	1.1695	0.379133	1.1211	2.2522	0.286505	1.08643	0.314596	0.981748	0.895578	0.954993	0.796266	0.96837	0.293677	0.8395
NCBI_Bias2	283	236	5.56	7.7	33.33	22.69	16.67	gi|74268324	PPIB protein [Bos taurus]	Bos taurus	4	1.01859	0.970349	1	0.960236	1.0093	0.0613886	0.9656	1.1272	0.555855	1.1272	0.36096	1.10662	0.396089	1.12034	2.19957	0.324652	1.09648	0.552651	1	0.974447	0.981748	0.981068	0.990874	0.0390852	0.9802
NCBI_Bias2	371	25	30.78	30.78	67.16	65.68	52.66	gi|81674781	MDH2 protein [Bos taurus]	Bos taurus	19	0.972747	0.52845	0.887156	0.467183	0.929952	1.21502	0.535261	1.02802	0.829449	1.11686	0.801372	1.21339	0.960172	1.11942	0.390054	0.7985	1.02802	0.70116	0.981748	0.642853	0.954993	0.59092	0.96837	0.84072	0.6376
NCBI_Bias2	131	13	45.54	45.54	63.35	51.66	47.12	gi|296490434	60 kDa heat shock protein, mitochondrial [Bos taurus]	Bos taurus	36	0.946237	0.205203	0.685488	0.131246	0.815863	3.13946	0.196912	0.937562	0.145317	0.972747	0.602449	1.44544	0.171584	1.11858	3.64657	0.153355	0.990832	0.748837	1	0.601605	1.01859	0.712652	1.0093	0.735622	0.687289
Uni_Bias2	432	321	4.02	6.22	34.44	20	15.56	tr|A4IFP7|A4IFP7_BOVIN	ARF5 protein OS=Bos taurus GN=ARF5 PE=2 SV=1	BOVIN	3	0.991454	0.945915	0.954993	0.933212	0.973223	0.108335	0.9277	1.06787	0.632648	1.10662	0.792123	1.18032	0.67712	1.11827	0.93876	0.606531	1.10988	0.489739	1.02797	0.830345	1.02802	0.929178	1.02799	0.225285	0.882497
Uni_Bias2	780	28	30.65	30.78	53.92	43.92	36.27	tr|Q148D3|Q148D3_BOVIN	Fumarate hydratase OS=Bos taurus GN=FH PE=2 SV=1	BOVIN	22	0.882357	0.00436782	0.771214	0.14427	0.826785	6.40112	0.038774	0.934905	0.0734768	0.972747	0.984322	1.44544	0.0824385	1.1177	4.44916	0.105399	1.09106	0.023463	1.02688	0.461593	1.05682	0.741737	1.04185	0.930982	0.606531
Uni_Bias2	157	257	5.45	5.86	33.33	22.69	16.67	sp|P80311|PPIB_BOVIN	Peptidyl-prolyl cis-trans isomerase B OS=Bos taurus GN=PPIB PE=1 SV=4	BOVIN	4	1.05569	0.577342	0.981748	0.978829	1.01872	0.495721	0.778801	1.13645	0.185127	1.10662	0.35445	1.10662	0.394367	1.11657	3.17415	0.196912	1.07921	0.591354	0.99965	0.996595	0.972747	0.953874	0.986199	0.0439811	0.9802
Uni_Bias2	676	14	43.44	43.44	63.35	50.96	46.42	tr|F1MUZ9|F1MUZ9_BOVIN	Uncharacterized protein OS=Bos taurus GN=HSPD1 PE=4 SV=1	BOVIN	34	0.92425	0.164531	0.698232	0.141555	0.811241	3.26565	0.173774	0.93048	0.0416471	0.981748	0.599753	1.43219	0.194319	1.11481	4.62786	0.093014	1.0147	0.757315	1.00472	0.888483	1.01859	0.733665	1.01165	0.371706	0.7985
Uni_Bias2	372	373	2.82	2.84	11.8	5.337	5.337	sp|Q5E9A3|PCBP1_BOVIN	Poly(rC)-binding protein 1 OS=Bos taurus GN=PCBP1 PE=2 SV=1	BOVIN	2	1.00487	0.978541	1	0.988573	1.00243	0.0288243	0.9851	1.19821	0.320245	1.10662	0.696512	1.03753	0.772658	1.11412	1.5272	0.416862	1.14066	0.513624	0.95449	0.721216	0.937562	0.920589	0.946026	0.355738	0.7985
Uni_Bias2	837	414	2.08	2.2	12.71	11.86	7.627	tr|Q3SZ32|Q3SZ32_BOVIN	Transcription elongation factor B (SIII), polypeptide 2 (18kDa, elongin B) OS=Bos taurus GN=TCEB2 PE=4 SV=1	BOVIN	1	1.05253		1.02802	0.940133	1.04027	0.0536213	0.9704	1.08591		1.13763	0.77989	1.11686	0.817515	1.11347	0.390941	0.7985	1.04168		1.0072		1	0.98163	1.0036	0.0161041	0.9864
Uni_Bias2	521	485	2	2	7.826	7.826	7.826	tr|E1BB92|E1BB92_BOVIN	Uncharacterized protein OS=Bos taurus GN=TCL1A PE=4 SV=1	BOVIN	1	1.07886		1.03753	0.945934	1.05819	0.0482784	0.9746	1.24023		1.14815	0.802296	0.946237	0.901151	1.11154	0.281736	0.882497	0.991425		0.860333		0.855067	0.761979	0.8577	0.236115	0.882497
Uni_Bias2	520	473	2	2	25.42	5.085	5.085	tr|E1B9I1|E1B9I1_BOVIN	Uncharacterized protein OS=Bos taurus PE=4 SV=1	BOVIN	1	0.94265		0.963829	0.882099	0.95324	0.108965	0.9277	1.00621		0.972747	0.895587	1.35519	0.516607	1.11138	0.669465	0.6989	1.3458		1.25771		1.33045	0.657693	1.29408	0.363953	0.7985
NCBI_Bias2	119	334	3.34	5.65	36.67	20	15.56	gi|296488305	ADP-ribosylation factor 5 [Bos taurus]	Bos taurus	3	0.972747	0.957029	0.963829	0.939778	0.968288	0.0920992	0.9512	1.03753	0.89513	1.10662	0.788006	1.18032	0.682682	1.10816	0.634732	0.6989	1.09648	0.780625	1.02802	0.920785	1.02802	0.93433	1.02802	0.130683	0.9277
Uni_Bias2	22	384	2.56	4.63	30.29	15.38	8.654	sp|A6QR46|RAB6B_BOVIN	Ras-related protein Rab-6B OS=Bos taurus GN=RAB6B PE=2 SV=1	BOVIN	2	0.991378	0.8977	0.981748	0.963314	0.986563	0.126201	0.9277	1.07975	0.292438	1.09648	0.486466	1.13763	0.386778	1.10462	2.5189	0.25284	1.08935	0.24709	0.997753	0.973352	1.00925	0.883835	1.0035	0.130717	0.9277
NCBI_Bias2	53	235	5.57	6.18	50	36.75	21.08	gi|296475350	cofilin-2 [Bos taurus]	Bos taurus	3	1.05682	0.759356	1.04713	0.8126	1.05197	0.419356	0.7985	1.04713	0.784487	1.11686	0.622405	1.14815	0.546905	1.10405	1.14686	0.535261	1.07647	0.71838	1.08643	0.694594	1.08643	0.720362	1.08643	0.601437	0.6989
Uni_Bias2	473	235	6.08	6.08	33.99	25.49	23.53	tr|A6QQL4|A6QQL4_BOVIN	UBFD1 protein OS=Bos taurus GN=UBFD1 PE=2 SV=1	BOVIN	5	1.01357	0.892734	1.00925	0.943883	1.01141	0.148719	0.9277	1.13769	0.284507	1.1272	0.63386	1.04713	0.827716	1.10401	1.65206	0.416862	1.12756	0.590124	1.00188	0.985417	0.937562	0.839741	0.969719	0.164469	0.9048
NCBI_Bias2	351	474	2	2	5.923	3.484	3.484	gi|78042570	26S proteasome non-ATPase regulatory subunit 8 [Bos taurus]	Bos taurus	1	1.15878	0.76168	1.13763	0.779794	1.1482	0.452495	0.778801	1.08643	0.851645	1.14815	0.764627	1.07647	0.868836	1.10368	0.494707	0.778801	1	0.980861	1.0666	0.88317	1.0666	0.885489	1.0666	0.213545	0.882497
NCBI_Bias2	409	418	2.04	4.04	7.295	1.672	1.672	gi|86821670	Carnitine palmitoyltransferase 2 [Bos taurus]	Bos taurus	2	0.954993	0.943243	0.946237	0.922789	0.950615	0.120548	0.9277	1.0666	0.878357	1.13763	0.789283	1.10662	0.818905	1.10362	0.491725	0.778801	1.03753	0.928071	0.928966	0.893197	0.928966	0.890868	0.928966	0.198479	0.9048
Uni_Bias2	190	341	3.51	7.94	50	40.36	27.71	sp|Q148F1|COF2_BOVIN	Cofilin-2 OS=Bos taurus GN=CFL2 PE=2 SV=1	BOVIN	4	1.0788	0.586885	1.04713	0.904065	1.06297	0.550495	0.6989	1.06484	0.642751	1.11686	0.804076	1.1272	0.789152	1.10297	0.778999	0.6703	1.04911	0.715453	1.06029	0.662733	1.05682	0.887947	1.05855	0.460549	0.778801
NCBI_Bias2	185	489	2	2	4.865	4.865	4.865	gi|297488260	PREDICTED: T-cell lymphoma breakpoint 1-like [Bos taurus]	Bos taurus	1	1.07647	0.874759	1.04713	0.940017	1.0618	0.169952	0.9048	1.21339	0.678038	1.14815	0.799819	0.946237	0.893326	1.10259	0.629489	0.6989	0.972747	0.985295	0.855067	0.770166	0.855067	0.757827	0.855067	0.467692	0.778801
NCBI_Bias2	95	22	33.49	33.61	29.52	20.75	19.04	gi|296482984	methylenetetrahydrofolate dehydrogenase 1 [Bos taurus]	Bos taurus	18	0.972747	0.626982	0.912011	0.549939	0.942379	0.924861	0.606531	1	0.988583	1.18032	0.549777	1.1272	0.560858	1.10251	1.03189	0.535261	0.990832	0.949169	0.963829	0.57319	0.870964	0.538972	0.917396	1.02027	0.535261
Uni_Bias2	37	243	6	6	25.14	25.14	25.14	sp|O46415|FRIL_BOVIN	Ferritin light chain OS=Bos taurus GN=FTL PE=2 SV=3	BOVIN	3	0.830156	0.260497	0.809096	0.155176	0.819626	2.78675	0.22313	1.02842	0.850774	1.08643	0.528768	1.19124	0.175141	1.10203	2.20707	0.324652	1.12066	0.33423	0.903046	0.664781	0.895365	0.452546	0.899205	1.04332	0.535261
Uni_Bias2	784	525	1.35	1.36	6.63	2.762	2.762	tr|Q148K7|Q148K7_BOVIN	Low density lipoprotein receptor-related protein associated protein 1 OS=Bos taurus GN=LRPAP1 PE=2 SV=1	BOVIN	1	1.01794		0.990832	0.99429	1.00439	0.00497345	0.99	1.12412		1.18032	0.731561	1	0.991298	1.10148	0.27909	0.882497	0.933145		0.842952		0.83946	0.743659	0.841206	0.257252	0.8395
Uni_Bias2	77	131	11.48	11.48	51.63	22.56	21.16	sp|P12344|AATM_BOVIN	Aspartate aminotransferase, mitochondrial OS=Bos taurus GN=GOT2 PE=1 SV=2	BOVIN	8	0.992657	0.915601	0.981748	0.857415	0.987203	0.210205	0.882497	1.13612	0.034163	1.10662	0.251966	1.05682	0.696087	1.09986	4.44488	0.105399	1.08392	0.20193	0.944624	0.288548	0.937562	0.33072	0.941093	2.04064	0.324652
Uni_Bias2	515	510	1.7	1.7	4.669	4.669	4.669	tr|E1B8Q0|E1B8Q0_BOVIN	Uncharacterized protein OS=Bos taurus PE=4 SV=1	BOVIN	1	1.03078		1.00925	0.973923	1.02002	0.0229505	0.9864	1.05526		1.10662	0.822021	1.13763	0.77843	1.09984	0.387795	0.7985	1.0698		1.04244		1.03753	0.926036	1.03998	0.0667442	0.9704
Uni_Bias2	798	348	3.35	3.35	12.01	7.207	5.105	tr|Q29RN2|Q29RN2_BOVIN	Glycogenin 1 OS=Bos taurus GN=GYG1 PE=2 SV=1	BOVIN	2	0.951136	0.530942	0.928966	0.611082	0.940051	0.977707	0.606531	1.08149	0.350195	1.03753	0.815711	1.18032	0.456255	1.09978	1.76989	0.367879	1.18783	0.093081	1.04208	0.601132	1.05682	0.961788	1.04945	0.475901	0.778801
Uni_Bias2	478	356	3.09	3.12	14.2	7.716	5.556	tr|A6QQX0|A6QQX0_BOVIN	PBK protein OS=Bos taurus GN=PBK PE=2 SV=1	BOVIN	2	1.00555	0.943157	0.981748	0.964211	0.993649	0.082488	0.956	1.07136	0.404841	1.09648	0.525381	1.1272	0.435172	1.09834	2.06716	0.324652	1.07609	0.38067	1.00768	0.921314	1.00925	0.90252	1.00847	0.160271	0.9048
Uni_Bias2	183	358	3.05	3.05	17.04	9.417	9.417	sp|Q0VCP1|KAD4_BOVIN	Adenylate kinase isoenzyme 4, mitochondrial OS=Bos taurus GN=AK4 PE=2 SV=1	BOVIN	2	0.95715	0.595664	0.937562	0.818301	0.947356	0.624171	0.6989	1.00661	0.937479	1.10662	0.650443	1.18032	0.507401	1.09785	1.01896	0.535261	1.08476	0.353235	1.02935	0.724662	0.990832	0.99183	1.01009	0.286855	0.8395
Uni_Bias2	194	363	3	3	30.07	6.159	6.159	sp|Q17QL1|GNPI2_BOVIN	Glucosamine-6-phosphate isomerase 2 OS=Bos taurus GN=GNPDA2 PE=2 SV=1	BOVIN	2	0.901275	0.825852	0.887156	0.485572	0.894215	0.793688	0.6703	1.06614	0.674815	1.11686	0.558715	1.10662	0.514093	1.09654	1.42517	0.472367	1.04864	0.945095	0.888695	0.625241	0.879023	0.526377	0.883859	0.965311	0.606531
Uni_Bias2	846	345	3.39	3.41	15.46	8.763	8.763	tr|Q3T0J4|Q3T0J4_BOVIN	Heme oxygenase (Decycling) 2 OS=Bos taurus GN=HMOX2 PE=2 SV=1	BOVIN	2	1.0418	0.768819	1.01859	0.927183	1.0302	0.294021	0.8395	1.06379	0.667692	1.1272	0.719206	1.09648	0.786196	1.09582	0.84608	0.6376	1.02321	0.86626	0.999635	0.997835	0.990832	0.994817	0.995234	0.00639598	0.99
NCBI_Bias2	103	337	3.22	3.24	29.94	7.716	5.556	gi|296484937	PDZ binding kinase [Bos taurus]	Bos taurus	2	1.01859	0.860591	0.990832	0.982198	1.00471	0.146008	0.9277	1.04713	0.720922	1.10662	0.517928	1.1272	0.448011	1.09365	1.55311	0.416862	1.02802	0.805809	1	0.950208	1.00925	0.915077	1.00463	0.121448	0.9277
Uni_Bias2	270	508	1.72	2.09	9.904	6.709	2.236	sp|Q32LM2|SGTA_BOVIN	Small glutamine-rich tetratricopeptide repeat-containing protein alpha OS=Bos taurus GN=SGTA PE=2 SV=1	BOVIN	1	1.07523	0.84596	1.01859	0.951192	1.04691	0.188763	0.9048	1.09519	0.526473	1.14815	0.762444	1.03753	0.926939	1.09363	0.858728	0.6376	0.945431	0.811607	0.925392	0.576652	0.92045	0.874698	0.922921	0.594456	0.6989
Uni_Bias2	281	230	6.25	6.25	19.41	12.35	10.88	sp|Q3MI00|DNJB1_BOVIN	DnaJ homolog subfamily B member 1 OS=Bos taurus GN=DNAJB1 PE=2 SV=3	BOVIN	3	1.06212	0.500105	1.02802	0.811226	1.04507	0.783594	0.6703	1.0968	0.289184	1.1272	0.432877	1.05682	0.665972	1.09361	2.15801	0.324652	1.02995	0.71001	0.994947	0.948551	0.963829	0.878836	0.979388	0.158063	0.9048
NCBI_Bias2	125	64	19.96	19.96	45.49	28.72	25.37	gi|296489367	calcium-binding mitochondrial carrier protein SCaMC-1 [Bos taurus]	Bos taurus	12	0.937562	0.527713	0.809096	0.351413	0.873329	1.46357	0.472367	1.00925	0.93042	1.07647	0.926447	1.19124	0.413558	1.09232	0.895928	0.6376	1.04713	0.520332	0.972747	0.939649	0.895365	0.832366	0.934056	0.21344	0.882497
Uni_Bias2	824	264	5.26	5.29	36.89	10.11	10.11	tr|Q3MHY9|Q3MHY9_BOVIN	ACTR1A protein (Fragment) OS=Bos taurus GN=ACTR1A PE=2 SV=1	BOVIN	3	1.01933	0.922249	1.09648	0.570533	1.05791	0.557742	0.6989	1.09655	0.586116	1.15878	0.392059	1.01859	0.850276	1.09131	1.41821	0.472367	1.12808	0.570319	1.04692	0.674381	0.963829	0.885335	1.00537	0.447975	0.7985
NCBI_Bias2	25	313	4	4	6.905	6.905	6.905	gi|296471851	tumor susceptibility gene 101 [Bos taurus]	Bos taurus	2	1.0666	0.877303	1.04713	0.901336	1.05686	0.203928	0.882497	0.990832	0.994949	1.04713	0.908661	1.23595	0.662614	1.0913	0.445074	0.7985	1.14815	0.75607	1.24738	0.653075	1.24738	0.657065	1.24738	0.734857	0.687289
NCBI_Bias2	29	456	2	2.02	3.163	1.757	1.757	gi|296472701	beta-transducin repeat containing protein [Bos taurus]	Bos taurus	1	1.2942	0.616612	1.28233	0.630872	1.28826	0.820094	0.6376	1.15878	0.760527	1.22462	0.682246	0.887156	0.826986	1.09018	0.734892	0.687289	0.831764	0.726797	0.928966	0.895803	0.928966	0.893471	0.928966	0.193415	0.9048
NCBI_Bias2	377	413	2.06	2.06	4.87	2.922	2.922	gi|83638582	Coatomer protein complex, subunit epsilon [Bos taurus]	Bos taurus	1	1.45881	0.501209	1.40605	0.444248	1.43243	1.30471	0.472367	1.00925	0.963375	1.07647	0.823738	1.18032	0.680511	1.08868	0.535161	0.7596	0.981748	0.982103	1.41906	0.529804	1.5417	0.382919	1.48038	1.38556	0.472367
Uni_Bias2	674	58	21.37	21.37	41.42	28.66	25.31	tr|F1MUY6|F1MUY6_BOVIN	Uncharacterized protein (Fragment) OS=Bos taurus GN=SLC25A24 PE=4 SV=1	BOVIN	11	0.919494	0.0521225	0.809096	0.328675	0.864295	3.53241	0.153355	1.00562	0.889216	1.0666	0.949763	1.19124	0.378591	1.08782	0.990416	0.606531	1.08711	0.0587666	0.991575	0.833665	0.903649	0.869512	0.947612	0.279466	0.8395
Uni_Bias2	732	418	2.07	4.08	8.207	1.672	1.672	tr|F1N1M7|F1N1M7_BOVIN	Uncharacterized protein OS=Bos taurus GN=CPT2 PE=4 SV=1	BOVIN	2	0.963578		1.08643	0.776383	1.025	0.219849	0.882497	1.07707		1.14815	0.65752	1.03753	0.87484	1.08758	0.480325	0.778801	1.04587		0.933389		0.981748	0.980246	0.957568	0.0173299	0.9864
NCBI_Bias2	201	91	15.65	17.82	24.66	21.03	15.86	gi|300796214	insulin-like growth factor 2 mRNA-binding protein 3 [Bos taurus]	Bos taurus	8	1	0.961159	0.990832	0.92222	0.995416	0.10474	0.9277	1.04713	0.429651	1.10662	0.204895	1.10662	0.169907	1.08679	3.65028	0.153355	1.05682	0.374099	1	0.878973	0.990832	0.984391	0.995416	0.125714	0.9277
Uni_Bias2	776	412	2.09	2.09	16.79	4.58	4.58	tr|Q0V8B0|Q0V8B0_BOVIN	Dihydroorotate dehydrogenase (Fragment) OS=Bos taurus GN=DHODH PE=2 SV=1	BOVIN	1	1.00069	0.993955	0.972747	0.915674	0.986719	0.0817845	0.956	1.0545	0.579361	1.05682	0.728891	1.14815	0.486911	1.08649	1.37388	0.472367	1.09454	0.379999	1.03646	0.701627	1.04713	0.774477	1.04179	0.52977	0.7596
NCBI_Bias2	193	487	2	2	5.455	5.455	5.455	gi|297491983	PREDICTED: 6-pyruvoyltetrahydropterin synthase-like [Bos taurus]	Bos taurus	1	1.1695	0.740457	1.15878	0.758093	1.16414	0.501555	0.7596	1.11686	0.807532	1.19124	0.724433	0.946237	0.925422	1.08478	0.533004	0.7596	0.879023	0.816435	0.92045	0.888714	0.92045	0.886391	0.92045	0.207225	0.882497
Uni_Bias2	852	492	1.93	2	27.93	6.757	4.054	tr|Q3T0U5|Q3T0U5_BOVIN	Chromatin modifying protein 2A OS=Bos taurus GN=CHMP2A PE=2 SV=1	BOVIN	1	1.03601	0.781179	1.02802	0.914095	1.03201	0.292517	0.8395	1.0633	0.646214	1.11686	0.727868	1.0666	0.83702	1.08225	0.809671	0.6376	1.0198	0.875299	0.991244	0.943502	0.972747	0.963093	0.981995	0.0831777	0.9608
Uni_Bias2	284	422	2.06	2.07	14.82	2.353	2.353	sp|Q3SWX8|RBBP7_BOVIN	Histone-binding protein RBBP7 OS=Bos taurus GN=RBBP7 PE=2 SV=1	BOVIN	1	0.861741	0.20674	0.887156	0.487433	0.874448	1.99332	0.367879	1.08026	0.440624	1.08643	0.606662	1.07647	0.586727	1.08105	1.6091	0.416862	1.13459	0.428774	0.903402	0.336488	0.887156	0.504189	0.895279	1.54087	0.416862
Uni_Bias2	388	528	1.34	1.37	8.906	4.071	2.29	sp|Q5EAB4|CHID1_BOVIN	Chitinase domain-containing protein 1 OS=Bos taurus GN=CHID1 PE=2 SV=1	BOVIN	1	0.956806	0.797231	0.937562	0.915388	0.947184	0.273621	0.8395	1.0003	0.998584	1.05682	0.888241	1.18032	0.728032	1.07915	0.379868	0.7985	1.1047	0.498242	1.05408	0.688836	1.04713	0.908846	1.0506	0.406787	0.7985
Uni_Bias2	813	456	2	2.02	17.97	3.922	3.922	tr|Q2TA18|Q2TA18_BOVIN	Coiled-coil domain containing 50 OS=Bos taurus GN=CCDC50 PE=2 SV=1	BOVIN	1	1.16974		1.13763	0.777729	1.15368	0.218343	0.882497	1.12791		1.18032	0.72702	0.928966	0.895202	1.07906	0.373065	0.7985	0.869731		0.899792		0.895365	0.838525	0.897579	0.152968	0.9048
Uni_Bias2	409	509	1.7	1.7	10.05	3.653	3.653	sp|Q9BGI1|PRDX5_BOVIN	Peroxiredoxin-5, mitochondrial OS=Bos taurus GN=PRDX5 PE=2 SV=2	BOVIN	1	0.891544		0.870964	0.797225	0.881254	0.196838	0.9048	0.967278		1.01859	0.958879	1.24738	0.657307	1.07775	0.400936	0.7985	1.17256		1.07813		1.07647	0.872685	1.0773	0.118285	0.9277
NCBI_Bias2	335	506	1.61	1.61	21.93	4.545	2.139	gi|77735453	alcohol dehydrogenase class-3 [Bos taurus]	Bos taurus	1	1.15878	0.410525	1.14815	0.333005	1.15347	1.72842	0.416862	1.1272	0.467013	1.15878	0.291301	0.946237	0.740824	1.0774	1.99323	0.367879	0.895365	0.593482	0.92045	0.668878	0.928966	0.658401	0.924708	0.712325	0.6989
NCBI_Bias2	339	512	1.42	1.45	27.93	4.054	4.054	gi|77736047	charged multivesicular body protein 2a [Bos taurus]	Bos taurus	1	1.03753	0.925286	1.02802	0.90946	1.03277	0.149881	0.9277	1.05682	0.886031	1.11686	0.729953	1.05682	0.848318	1.07683	0.521394	0.7596	1	0.978235	0.981748	0.981635	0.972747	0.958333	0.977248	0.0530665	0.9704
Uni_Bias2	8	319	4.03	4.14	20.52	10.98	9.538	sp|A2VE14|SAE1_BOVIN	SUMO-activating enzyme subunit 1 OS=Bos taurus GN=SAE1 PE=2 SV=1	BOVIN	2	0.959711	0.87674	0.946237	0.927989	0.952974	0.179173	0.9048	1.06395	0.691828	1.1272	0.783774	1.03753	0.918898	1.07622	0.605087	0.6989	0.986778	0.959132	0.887472	0.48855	0.870964	0.792011	0.879218	0.824719	0.6376
Uni_Bias2	176	234	6.08	6.08	19.44	9.641	8.497	sp|Q0III3|DC1I2_BOVIN	Cytoplasmic dynein 1 intermediate chain 2 OS=Bos taurus GN=DYNC1I2 PE=1 SV=1	BOVIN	4	1.16736	0.234724	1.0666	0.482823	1.11698	1.89131	0.367879	1.11294	0.293436	1.07647	0.423981	1.03753	0.655181	1.07564	2.17756	0.324652	0.974999	0.76932	1.02045	0.814718	1.02802	0.736245	1.02423	0.44394	0.7985
Uni_Bias2	377	268	5.13	5.13	19.77	17.44	17.44	sp|Q5E9E2|MYL9_BOVIN	Myosin regulatory light polypeptide 9 OS=Bos taurus GN=MYL9 PE=2 SV=3	BOVIN	3	0.989996	0.971185	1.01859	0.750787	1.00429	0.274362	0.8395	0.998183	0.99369	1.09648	0.392622	1.1272	0.34119	1.07395	1.75156	0.367879	1.09905	0.67791	1.08704	0.64203	1.04713	0.654239	1.06709	0.753416	0.687289
NCBI_Bias2	419	167	8.51	15.6	34.49	21.32	17.33	gi|87578169	Moesin [Bos taurus]	Bos taurus	8	1.02802	0.766379	1.03753	0.697058	1.03277	0.544575	0.7596	1.05682	0.569731	1.10662	0.527909	1.05682	0.852981	1.07342	1.18166	0.535261	1.02802	0.750378	0.990832	0.969738	0.990832	0.944364	0.990832	0.0764122	0.9656
Uni_Bias2	514	260	5.41	5.58	28.85	9.471	6.388	tr|E1B844|E1B844_BOVIN	Uncharacterized protein OS=Bos taurus GN=TIMM44 PE=4 SV=1	BOVIN	3	1.02657	0.73502	1.00925	0.920563	1.01791	0.339296	0.8395	1.07459	0.468624	1.08643	0.600567	1.05682	0.710771	1.07261	1.39777	0.472367	1.04216	0.685342	0.993266	0.930021	0.981748	0.950593	0.987507	0.107025	0.9277
Uni_Bias2	718	204	7.02	15.96	35.76	23.09	14.41	tr|F1MZW0|F1MZW0_BOVIN	Uncharacterized protein (Fragment) OS=Bos taurus PE=4 SV=1	BOVIN	8	1.09078	0.248028	1.02802	0.684073	1.0594	1.5408	0.416862	1.11291	0.164282	1.0666	0.513737	1.03753	0.878064	1.07235	2.26029	0.286505	1.01654	0.80756	0.993832	0.926462	1	0.914494	0.996916	0.143983	0.9277
Uni_Bias2	405	343	3.49	3.66	12.33	12.33	10.05	sp|Q8MKF1|THTPA_BOVIN	Thiamine-triphosphatase OS=Bos taurus GN=THTPA PE=1 SV=3	BOVIN	2	0.92657	0.615225	0.972747	0.963772	0.949659	0.453984	0.778801	1.10105	0.50838	1.07647	0.672802	1.03753	0.863601	1.07168	1.05922	0.535261	1.1182	0.597791	0.9389	0.63849	0.937562	0.7556	0.938231	0.633108	0.6989
NCBI_Bias2	189	194	7.27	7.27	21.92	10.96	10.96	gi|297490601	PREDICTED: parvalbumin alpha-like [Bos taurus]	Bos taurus	5	0.972747	0.918097	0.963829	0.912877	0.968288	0.153399	0.9048	1.04713	0.789555	1.05682	0.723808	1.10662	0.664223	1.07019	0.84136	0.6376	1.08643	0.629001	1.01859	0.90271	1.01859	0.979926	1.01859	0.106517	0.9277
Uni_Bias2	854	169	8.72	8.72	22.52	20.11	16.09	tr|Q3T0V2|Q3T0V2_BOVIN	Aminoacylase 1 OS=Bos taurus GN=ACY1 PE=2 SV=1	BOVIN	4	1.05444	0.522594	1.03753	0.734395	1.04598	0.831811	0.6376	1.13238	0.161879	1.08643	0.515615	0.990832	0.997372	1.06988	2.15925	0.324652	1.01921	0.862969	0.946943	0.43091	0.946237	0.74749	0.94659	0.984015	0.606531
Uni_Bias2	36	327	4	4.02	21.55	13.26	13.26	sp|O46414|FRIH_BOVIN	Ferritin heavy chain OS=Bos taurus GN=FTH1 PE=2 SV=3	BOVIN	2	1.20282	0.312828	1.1695	0.720832	1.18616	1.29372	0.472367	1.045	0.733242	1.09648	0.829818	1.0666	0.874641	1.06936	0.547881	0.7596	0.995429	0.970513	1.14304	0.405306	1.13763	0.760736	1.14033	1.02197	0.535261
Uni_Bias2	249	353	3.17	3.17	22.49	14.35	11	sp|Q2T9V8|DTD1_BOVIN	D-tyrosyl-tRNA(Tyr) deacylase 1 OS=Bos taurus GN=DTD1 PE=2 SV=1	BOVIN	2	1.12522	0.29231	1.09648	0.626472	1.11085	1.47451	0.472367	1.07159	0.49328	1.1272	0.546888	1.00925	0.914264	1.06935	1.21587	0.535261	0.956583	0.64671	1.00191	0.983771	0.981748	0.980445	0.991828	0.0313656	0.9827
NCBI_Bias2	121	276	4.5	4.52	18.87	10.85	7.547	gi|296488737	thymidylate kinase [Bos taurus]	Bos taurus	2	0.879023	0.768512	0.862979	0.774689	0.871001	0.450445	0.778801	0.990832	0.998387	1.04713	0.916306	1.1695	0.744265	1.06915	0.333865	0.8395	1.08643	0.828416	0.954993	0.932247	0.963829	0.951142	0.959411	0.104447	0.9277
Uni_Bias2	83	261	5.35	5.35	17.62	11.89	11.89	sp|P15246|PIMT_BOVIN	Protein-L-isoaspartate(D-aspartate) O-methyltransferase OS=Bos taurus GN=PCMT1 PE=1 SV=2	BOVIN	3	1.0438	0.648929	0.981748	0.777168	1.01278	0.594577	0.6989	1.10061	0.357259	1.04713	0.799655	1.05682	0.878054	1.06819	1.20119	0.535261	1.09546	0.376078	1.03655	0.700055	1	0.854609	1.01827	0.4462	0.7985
NCBI_Bias2	85	501	1.67	6.21	24.5	19.5	17	gi|296482330	ras-related GTP-binding protein RAB10 [Bos taurus]	Bos taurus	3	1.02802	0.918439	1.00925	0.951688	1.01863	0.11691	0.9277	1.05682	0.834524	1.1272	0.704768	1.00925	0.953238	1.06442	0.502628	0.7596	0.937562	0.87242	0.903649	0.791211	0.903649	0.785379	0.903649	0.413257	0.7985
Uni_Bias2	594	128	11.8	11.9	44.69	27.36	18.5	tr|F1MFQ2|F1MFQ2_BOVIN	Uncharacterized protein (Fragment) OS=Bos taurus PE=4 SV=1	BOVIN	8	0.947184	0.217299	0.704693	0.104662	0.825938	3.28631	0.173774	0.951139	0.253791	0.981748	0.508652	1.25893	0.635921	1.06394	2.1714	0.324652	0.969377	0.469334	0.962921	0.383698	0.895365	0.571799	0.929143	1.31753	0.472367
Uni_Bias2	748	522	1.41	1.41	22.46	4.545	2.139	tr|F1N5F8|F1N5F8_BOVIN	Uncharacterized protein OS=Bos taurus GN=ADH5 PE=4 SV=1	BOVIN	1	1.13097	0.275095	1.14815	0.69071	1.13956	1.44244	0.472367	1.20282	0.115565	1.07647	0.821249	0.912011	0.82177	1.06376	2.2159	0.324652	0.954629	0.742894	0.896625	0.235199	0.972747	0.969548	0.934686	1.28399	0.472367
Uni_Bias2	220	502	1.85	1.85	5.738	2.186	2.186	sp|Q2HJ88|RTC1_BOVIN	RNA 3'-terminal phosphate cyclase OS=Bos taurus GN=RTCD1 PE=2 SV=1	BOVIN	1	1.29263		1.25893	0.647014	1.27578	0.378172	0.7985	1.09746		1.14815	0.764788	0.937562	0.916791	1.06106	0.308377	0.8395	0.881613		1.03587		1.02802	0.936194	1.03194	0.0572681	0.9704
Uni_Bias2	300	258	5.45	5.47	19.19	10.27	10.27	sp|Q3SZC4|NSF1C_BOVIN	NSFL1 cofactor p47 OS=Bos taurus GN=NSFL1C PE=2 SV=1	BOVIN	3	1.10372	0.47145	1.05682	0.71121	1.08027	0.949132	0.606531	1.01869	0.870418	1.05682	0.705492	1.10662	0.558657	1.06071	0.929268	0.606531	1.02141	0.828774	1.10445	0.368145	1.10662	0.563396	1.10554	1.36634	0.472367
NCBI_Bias2	261	517	1.33	1.33	34.34	14.14	5.051	gi|73586580	Guanylate kinase 1 [Bos taurus]	Bos taurus	1	1.08643	0.651544	1.07647	0.665756	1.08145	0.725482	0.687289	1.03753	0.789678	1.10662	0.581888	1.03753	0.820676	1.06056	0.847077	0.6376	0.981748	0.975403	1.01859	0.869118	1.00925	0.92358	1.01392	0.190894	0.9048
NCBI_Bias2	137	255	5.03	5.03	25.11	5.895	5.895	gi|297460585	PREDICTED: Cytokinesis, Apoptosis, RNA-associated family member (car-1)-like [Bos taurus]	Bos taurus	3	1.01859	0.849214	0.990832	0.998249	1.00471	0.143488	0.9277	1.01859	0.835341	1.08643	0.698587	1.07647	0.743041	1.06049	0.725807	0.687289	0.963829	0.872523	0.963829	0.85853	0.972747	0.948091	0.968288	0.178789	0.9048
Uni_Bias2	858	210	6.92	6.92	17.69	7.547	7.547	tr|Q3ZC41|Q3ZC41_BOVIN	Acetyl-Coenzyme A acyltransferase 1 OS=Bos taurus GN=ACAA1 PE=2 SV=1	BOVIN	4	1.06824	0.57174	1.0666	0.733904	1.06742	0.754325	0.6703	1.06472	0.591817	1.08643	0.760772	1.02802	0.955523	1.05972	0.732633	0.687289	0.990505	0.946319	0.99125	0.956413	1	0.985147	0.995625	0.0517068	0.9746
Uni_Bias2	398	156	9.47	9.47	43.51	42.86	38.96	sp|Q6EWQ7|IF5A1_BOVIN	Eukaryotic translation initiation factor 5A-1 OS=Bos taurus GN=EIF5A PE=2 SV=3	BOVIN	5	0.996073	0.977594	0.928966	0.616463	0.96252	0.439869	0.7985	1.01101	0.901471	1.05682	0.63809	1.10662	0.437586	1.05815	1.19821	0.535261	1.0063	0.964949	0.989296	0.903014	0.963829	0.864891	0.976563	0.214688	0.882497
Uni_Bias2	850	132	11.34	11.34	30.28	27.49	25.1	tr|Q3T0L9|Q3T0L9_BOVIN	SEC22 vesicle trafficking protein homolog B (S. cerevisiae) OS=Bos taurus GN=SEC22B PE=2 SV=1	BOVIN	7	0.98323	0.827038	0.972747	0.809923	0.977989	0.348061	0.8395	1.049	0.459023	1.08643	0.262847	1.03753	0.54739	1.05765	2.36033	0.286505	0.994099	0.932742	0.929464	0.243288	0.928966	0.428257	0.929215	1.96435	0.367879
Uni_Bias2	626	313	4.07	4.16	29.62	13.06	13.06	tr|F1MLX0|F1MLX0_BOVIN	Uncharacterized protein OS=Bos taurus GN=FAHD2A PE=4 SV=1	BOVIN	3	1.01574	0.866629	1.01859	0.922422	1.01717	0.194475	0.9048	1.00671	0.942622	1.0666	0.800407	1.09648	0.700466	1.0566	0.553929	0.6989	1.04993	0.612732	1.05681	0.571114	1.04713	0.81517	1.05197	0.664058	0.6989
NCBI_Bias2	123	171	8.14	8.14	30.77	22.38	20.63	gi|296489365	capping protein (actin filament) muscle Z-line, alpha 1 [Bos taurus]	Bos taurus	4	1.31826	0.0705936	1.14815	0.0581018	1.23321	4.77409	0.082085	1.14815	0.2605	1.0666	0.43198	0.954993	0.547579	1.05658	2.42056	0.286505	0.903649	0.477681	1.02802	0.770409	1.01859	0.734755	1.0233	0.494272	0.778801
Uni_Bias2	456	54	21.81	21.84	48.48	41.87	37.74	tr|A6H7A2|A6H7A2_BOVIN	Adenosine deaminase OS=Bos taurus GN=ADA PE=2 SV=1	BOVIN	12	1.0436	0.366455	1.00925	0.753664	1.02642	1.1176	0.535261	1.03409	0.475986	1.07647	0.346692	1.05682	0.512152	1.05579	2.14613	0.324652	0.992268	0.866813	0.998744	0.978398	0.990832	0.98854	0.994788	0.0289806	0.9851
Uni_Bias2	638	450	2	18.75	19.45	15.01	11.61	tr|F1MP69|F1MP69_BOVIN	Uncharacterized protein OS=Bos taurus GN=UBA1 PE=4 SV=1	BOVIN	10	0.986174	0.781556			0.986174	0.214079	0.882497	1.05519	0.309371					1.05519	1.01904	0.535261	1.06397	0.383873	0.991595	0.880339			0.991595	0.110701	0.9277
Uni_Bias2	560	515	1.64	1.66	10.38	3.302	3.302	tr|E1BLI3|E1BLI3_BOVIN	Uncharacterized protein OS=Bos taurus PE=4 SV=1	BOVIN	1	0.874473	0.615501	0.895365	0.573391	0.884919	0.904641	0.606531	0.953868	0.726675	1.00925	0.928109	1.20226	0.389993	1.05513	1.16001	0.535261	1.18265	0.559613	1.08174	0.585537	1.0666	0.696214	1.07417	0.779405	0.6703
Uni_Bias2	876	226	6.29	6.29	48.59	30.28	25.35	tr|Q862Q9|Q862Q9_BOVIN	Similar to ubiquitin-conjugating enzyme E2 variant 2 (Fragment) OS=Bos taurus PE=2 SV=1	BOVIN	6	0.907554	0.366434	0.912011	0.762462	0.909783	1.10757	0.535261	0.958864	0.745787	1.05682	0.815992	1.14815	0.597665	1.05461	0.878484	0.6376	1.07164	0.493204	1.01223	0.896919	0.990832	0.992268	1.00153	0.101236	0.9277
Uni_Bias2	242	529	1.34	1.36	4.321	3.086	3.086	sp|Q2KJI3|FA49B_BOVIN	Protein FAM49B OS=Bos taurus GN=FAM49B PE=2 SV=1	BOVIN	1	1.03247		1.00925	0.971274	1.02086	0.0253168	0.9864	1.00968		1.05682	0.890149	1.09648	0.843919	1.05433	0.248473	0.9048	1.02367		1.04422		1.03753	0.923296	1.04088	0.069318	0.9704
Uni_Bias2	380	196	7.33	7.47	42.54	22.65	22.65	sp|Q5E9I6|ARF3_BOVIN	ADP-ribosylation factor 3 OS=Bos taurus GN=ARF3 PE=2 SV=3	BOVIN	4	0.989646	0.933761	0.954993	0.939924	0.972319	0.113343	0.9277	0.997017	0.980918	1.02802	0.939273	1.13763	0.77865	1.05422	0.288466	0.882497	1.01528	0.90402	1.00525	0.966604	1.05682	0.891506	1.03104	0.129254	0.9277
Uni_Bias2	110	215	6.64	6.64	30.95	30.95	21.43	sp|P28801|GSTP1_BOVIN	Glutathione S-transferase P OS=Bos taurus GN=GSTP1 PE=1 SV=2	BOVIN	4	0.952582	0.81592	0.981748	0.929371	0.967165	0.240326	0.882497	1.03083	0.819701	0.972747	0.83388	1.15878	0.311789	1.05412	1.34276	0.472367	1.15528	0.569108	1.06619	0.582814	1.18032	0.271054	1.12326	1.60283	0.416862
NCBI_Bias2	91	291	4.17	4.25	22.93	13.06	13.06	gi|296482789	fumarylacetoacetate hydrolase domain-containing protein 2A [Bos taurus]	Bos taurus	3	1.01859	0.903956	1.01859	0.913861	1.01859	0.165946	0.9048	1.00925	0.941385	1.0666	0.797645	1.08643	0.715013	1.05409	0.540218	0.7596	1.03753	0.871172	1.04713	0.834624	1.03753	0.825568	1.04233	0.323512	0.8395
Uni_Bias2	839	238	6.04	6.04	33.67	20.92	20.92	tr|Q3SZ96|Q3SZ96_BOVIN	LZIC protein (Fragment) OS=Bos taurus GN=LZIC PE=2 SV=1	BOVIN	3	1.19299	0.42518	1.08643	0.308087	1.13971	1.76551	0.367879	1.05565	0.667878	1.07647	0.334573	1.02802	0.679926	1.05338	1.6367	0.416862	0.952567	0.631705	1.07399	0.532395	1.03753	0.62481	1.05576	0.956037	0.606531
Uni_Bias2	91	193	7.4	7.42	38.24	34.8	18.63	sp|P19803|GDIR1_BOVIN	Rho GDP-dissociation inhibitor 1 OS=Bos taurus GN=ARHGDIA PE=1 SV=3	BOVIN	5	1.0314	0.718157	1	0.938461	1.0157	0.342728	0.8395	1.14128	0.117203	1.01859	0.875088	1	0.745592	1.05329	2.23302	0.324652	1.05012	0.614866	0.947963	0.401754	0.972747	0.929742	0.960355	0.855354	0.6376
Uni_Bias2	210	417	2.08	2.08	6.494	4.87	2.922	sp|Q28104|COPE_BOVIN	Coatomer subunit epsilon OS=Bos taurus GN=COPE PE=1 SV=3	BOVIN	1	1.4738		1.44544	0.514868	1.45962	0.576607	0.6989	1.02129		1.07647	0.872195	1.05682	0.896874	1.05152	0.213309	0.9048	0.98948		1.42442		1.41906	0.528491	1.42174	0.553925	0.6989
Uni_Bias2	448	67	20.34	20.34	59.27	39.33	37.92	tr|A5PJA6|A5PJA6_BOVIN	Stomatin (EPB72)-like 2 OS=Bos taurus GN=STOML2 PE=2 SV=1	BOVIN	11	1.03265	0.519511	0.990832	0.695929	1.01174	0.88368	0.6376	1.09787	0.0838547	1.02802	0.393584	1.02802	0.696115	1.0513	3.27751	0.173774	1.07544	0.179005	1.00941	0.849812	0.990832	0.92939	1.00012	0.204958	0.882497
Uni_Bias2	415	70	19.22	19.22	19.85	17.79	17.79	sp|Q9BH11|ZP4_BOVIN	Zona pellucida sperm-binding protein 4 OS=Bos taurus GN=ZP4 PE=1 SV=2	BOVIN	18	1.00877	0.894784	1.03753	0.258169	1.02315	1.27275	0.472367	1.23174	0.0251255	0.981748	0.554754	0.937562	0.105004	1.05035	5.66916	0.056416	1.1593	0.0439143	0.947273	0.377443	0.981748	0.805777	0.96451	1.03387	0.535261
NCBI_Bias2	227	408	2.07	2.1	4.502	2.133	2.133	gi|329744535	ubiquitin-conjugating enzyme E2 Q1 [Bos taurus]	Bos taurus	1	1.04713	0.9143	1.02802	0.934693	1.03757	0.136484	0.9277	1.0666	0.878919	1.13763	0.789805	0.946237	0.923169	1.05015	0.386499	0.7985	0.879023	0.814337	0.862979	0.781545	0.862979	0.779422	0.862979	0.430546	0.7985
Uni_Bias2	548	496	1.91	1.95	7.109	2.133	2.133	tr|E1BIE5|E1BIE5_BOVIN	Uncharacterized protein OS=Bos taurus GN=UBE2Q1 PE=4 SV=1	BOVIN	1	1.05222		1.02802	0.940601	1.04012	0.0531889	0.9704	1.07668		1.1272	0.792257	0.946237	0.931097	1.05004	0.264278	0.882497	0.889516		0.867192		0.862979	0.783682	0.865085	0.21172	0.882497
Uni_Bias2	104	249	5.78	5.78	27.37	11.26	9.934	sp|P23004|QCR2_BOVIN	Cytochrome b-c1 complex subunit 2, mitochondrial OS=Bos taurus GN=UQCRC2 PE=1 SV=2	BOVIN	3	0.970875	0.788357	0.963829	0.705688	0.967352	0.509329	0.7596	1.07445	0.631322	1.05682	0.448391	1.01859	0.688017	1.04995	1.42099	0.472367	1.03092	0.766392	0.92939	0.421777	0.928966	0.461245	0.929178	1.42197	0.472367
Uni_Bias2	534	197	7.28	7.28	23.26	10.08	10.08	tr|E1BEY9|E1BEY9_BOVIN	Uncharacterized protein OS=Bos taurus GN=LSM14B PE=4 SV=1	BOVIN	4	1.02923	0.752196	1.02802	0.854123	1.02862	0.384297	0.7985	1.0158	0.839697	1.07647	0.664032	1.05682	0.746771	1.0497	0.761002	0.6703	0.993593	0.933319	1.00393	0.959407	1	0.945554	1.00197	0.0846216	0.9608
Uni_Bias2	669	220	6.45	6.45	15.69	9.192	6.973	tr|F1MUP4|F1MUP4_BOVIN	Uncharacterized protein OS=Bos taurus GN=RPN2 PE=4 SV=1	BOVIN	3	1.05269	0.602581	1.00925	0.686852	1.03097	0.766242	0.6703	1.165	0.306809	1.03753	0.978095	0.946237	0.405972	1.04959	1.82851	0.367879	0.985962	0.885574	0.888878	0.393092	0.928966	0.257228	0.908922	1.99038	0.367879
NCBI_Bias2	41	260	4.94	4.94	17.65	12.75	12.75	gi|296473914	beta-Ala-His dipeptidase [Bos taurus]	Bos taurus	4	1.05682	0.750306	1.03753	0.89166	1.04717	0.349124	0.8395	1.07647	0.721981	1.10662	0.731451	0.963829	0.938564	1.04897	0.609651	0.6989	0.946237	0.902813	0.928966	0.871848	0.903649	0.892372	0.916308	0.218026	0.882497
Uni_Bias2	666	283	4.67	4.67	17.9	10.7	7.642	tr|F1MTY7|F1MTY7_BOVIN	Uncharacterized protein OS=Bos taurus GN=ADSS PE=4 SV=1	BOVIN	2	1.1208	0.283801	1.09648	0.602706	1.10864	1.53376	0.416862	1.09927	0.460981	1.11686	0.543665	0.928966	0.715371	1.04837	1.49291	0.472367	0.913723	0.363359	0.929448	0.451481	0.912011	0.648979	0.920729	1.06626	0.535261
NCBI_Bias2	337	239	5.5	5.5	17.69	7.547	5.189	gi|77735591	3-ketoacyl-CoA thiolase, peroxisomal [Bos taurus]	Bos taurus	3	1.0666	0.666622	1.0666	0.723577	1.0666	0.63327	0.6989	1.03753	0.840299	1.08643	0.753053	1.01859	0.945753	1.04752	0.445925	0.7985	0.990832	0.810868	1.00925	0.999221	1	0.978468	1.00463	0.0195836	0.9864
Uni_Bias2	444	150	10.13	10.13	22.78	17.94	15.12	tr|A5D9E7|A5D9E7_BOVIN	Mitochondrial trifunctional protein, beta subunit OS=Bos taurus GN=HADHB PE=2 SV=1	BOVIN	8	1.01799	0.856765	1	0.798489	1.00899	0.329738	0.8395	1.06441	0.384597	1.07647	0.574878	1	0.914965	1.04696	1.38803	0.472367	0.97823	0.803885	0.932781	0.337625	0.928966	0.675523	0.930874	1.28385	0.472367
Uni_Bias2	191	189	7.63	7.64	19.28	12.95	10.24	sp|Q17QG2|NUDC_BOVIN	Nuclear migration protein nudC OS=Bos taurus GN=NUDC PE=2 SV=1	BOVIN	4	0.942878	0.449756	1	0.764513	0.971439	0.927277	0.606531	1.02629	0.725849	1.04713	0.72993	1.0666	0.37338	1.04667	1.40744	0.472367	1.11182	0.278535	1.01955	0.792655	1.01859	0.771872	1.01907	0.426741	0.7985
Uni_Bias2	552	40	25.31	25.31	49.21	40.9	40.9	tr|E1BJB1|E1BJB1_BOVIN	Uncharacterized protein OS=Bos taurus PE=3 SV=1	BOVIN	22	0.960887	0.524251	0.972747	0.578497	0.966817	1.03632	0.535261	0.990183	0.856025	1.07647	0.497936	1.0666	0.348039	1.04441	1.65742	0.416862	1.0153	0.805765	0.982802	0.703064	0.963829	0.774866	0.973316	0.527557	0.7596
NCBI_Bias2	285	139	10.31	10.31	27.16	18.74	15.79	gi|74268350	Hydroxyacyl-Coenzyme A dehydrogenase/3-ketoacyl-Coenzyme A thiolase/enoyl-Coenzyme A hydratase (trifunctional protein), beta subunit [Bos taurus]	Bos taurus	7	0.972747	0.968283	0.981748	0.897938	0.977248	0.121503	0.9277	1.02802	0.595818	1.07647	0.535067	1.02802	0.927884	1.04417	1.05797	0.535261	1	0.981943	0.946237	0.607228	0.937562	0.681264	0.9419	0.766665	0.6703
Uni_Bias2	316	404	2.16	2.16	11.83	9.677	5.376	sp|Q3T0M0|VPS29_BOVIN	Vacuolar protein sorting-associated protein 29 OS=Bos taurus GN=VPS29 PE=2 SV=1	BOVIN	1	0.923075	0.566741	0.928966	0.815042	0.926021	0.670871	0.6989	0.987441	0.919124	1.04713	0.854752	1.09648	0.714248	1.04368	0.501874	0.7596	1.04881	0.714002	0.977933	0.858753	0.981748	0.968486	0.979841	0.160077	0.9048
Uni_Bias2	877	209	6.93	6.93	17.36	9.585	9.585	tr|Q9BGU5|Q9BGU5_BOVIN	Cathepsin D (Fragment) OS=Bos taurus GN=cat-D PE=2 SV=1	BOVIN	4	1.18867	0.404454	0.972747	0.908997	1.08071	0.869136	0.6376	1.24026	0.320783	0.879023	0.927163	1.00925	0.411734	1.04285	1.82403	0.367879	1.17248	0.138013	1.12243	0.238434	1.10662	0.519529	1.11453	1.81404	0.367879
Uni_Bias2	600	346	3.39	3.39	14.6	8.503	5.36	tr|F1MHJ8|F1MHJ8_BOVIN	Uncharacterized protein OS=Bos taurus PE=4 SV=1	BOVIN	2	1.05729	0.418	1.01859	0.751224	1.03794	1.00611	0.535261	1.04903	0.479823	1.08643	0.333115	0.990832	0.977833	1.0421	1.61212	0.416862	0.896663	0.144921	0.901492	0.159672	0.928966	0.50544	0.915229	2.18621	0.324652
Uni_Bias2	145	489	2	2	4.186	4.186	4.186	sp|P67868|CSK2B_BOVIN	Casein kinase II subunit beta OS=Bos taurus GN=CSNK2B PE=1 SV=1	BOVIN	1	1.11929		1.09648	0.843184	1.10788	0.148155	0.9277	1.1166		1.1695	0.740706	0.83946	0.748764	1.04185	0.512018	0.7596	0.788537		0.788514		0.787046	0.657609	0.78778	0.364065	0.7985
Uni_Bias2	863	272	5	5.02	30.42	12.62	12.62	tr|Q58D70|Q58D70_BOVIN	Serine/threonine-protein phosphatase OS=Bos taurus GN=PPP2CA PE=2 SV=1	BOVIN	3	1.00811	0.963778	0.963829	0.934248	0.985971	0.0911215	0.9512	1.02075	0.883636	1.07647	0.772916	1.02802	0.946338	1.04174	0.379096	0.7985	1.02633	0.950083	1.01087	0.985057	0.92045	0.762273	0.965658	0.248857	0.882497
NCBI_Bias2	31	256	5.02	5.37	15.13	7.663	6.513	gi|296473006	karyopherin alpha 7 (importin alpha 8) [Bos taurus]	Bos taurus	3	0.946237	0.868822	0.972747	0.800286	0.959492	0.315648	0.8395	1.03753	0.840228	0.990832	0.915848	1.09648	0.365657	1.04161	1.10141	0.535261	1.18032	0.560932	1.07647	0.780342	1.08643	0.530123	1.08145	0.766676	0.6703
Uni_Bias2	790	195	7.35	7.35	22.92	18.14	12.59	tr|Q1JPB6|Q1JPB6_BOVIN	Acetyl-Coenzyme A acetyltransferase 2 OS=Bos taurus GN=ACAT2 PE=2 SV=1	BOVIN	3	0.882146	0.228892	0.879023	0.346276	0.880584	2.20189	0.324652	0.965328	0.647004	1.00925	0.878411	1.14815	0.26052	1.04091	1.65911	0.416862	1.12978	0.162514	1.02956	0.720038	1	0.940131	1.01478	0.338913	0.8395
Uni_Bias2	262	303	4.16	4.2	25.38	14.21	10.66	sp|Q2TBX2|PFD3_BOVIN	Prefoldin subunit 3 OS=Bos taurus GN=VBP1 PE=2 SV=1	BOVIN	2	1.10186	0.379476	1.05682	0.758125	1.07934	1.08215	0.535261	1.04226	0.682442	1.02802	0.750941	1.04713	0.693415	1.03913	0.89867	0.6376	1.02036	0.837381	1.07569	0.497201	1.07647	0.700239	1.07608	0.916444	0.606531
Uni_Bias2	6	134	10.92	10.92	47.74	40.74	28.81	sp|A2VDZ9|VAPB_BOVIN	Vesicle-associated membrane protein-associated protein B OS=Bos taurus GN=VAPB PE=2 SV=1	BOVIN	5	0.905553	0.21769	0.879023	0.367535	0.892288	2.19373	0.324652	0.969019	0.643019	1.00925	0.915295	1.13763	0.308065	1.03863	1.48315	0.472367	1.08958	0.236659	1.01578	0.81629	0.990832	0.975456	1.0033	0.197896	0.9048
NCBI_Bias2	259	367	2.6	2.6	19.73	14.29	7.483	gi|73586555	Similar to Putative ubiquitin-conjugating enzyme E2 D3-like protein [Bos taurus]	Bos taurus	1	0.704693	0.167458	0.895365	0.328203	0.800029	2.5199	0.25284	1.09648	0.819314	0.981748	0.913919	1.03753	0.662431	1.03858	0.609002	0.6989	1.25893	0.393729	0.831764	0.363475	0.946237	0.482206	0.889	1.51259	0.416862
Uni_Bias2	70	310	4.11	4.11	27.85	24.68	20.89	sp|P11064|PPAC_BOVIN	Low molecular weight phosphotyrosine protein phosphatase OS=Bos taurus GN=ACP1 PE=1 SV=3	BOVIN	2	1.0206	0.805765	0.981748	0.947543	1.00117	0.234385	0.882497	1.07434	0.498559	1.07647	0.387405	0.963829	0.776211	1.03821	1.64828	0.416862	0.868032	0.284484	0.822171	0.147539	0.887156	0.258413	0.854663	2.83756	0.22313
Uni_Bias2	550	332	3.97	20.27	40.31	18.67	12.39	tr|E1BIL2|E1BIL2_BOVIN	Uncharacterized protein OS=Bos taurus PE=3 SV=1	BOVIN	16	0.986854	0.83931	0.928966	0.539643	0.95791	0.687942	0.6989	1.14174	0.0705757	0.990832	0.603914	0.981748	0.606693	1.03811	3.1748	0.196912	1.08588	0.213979	0.935845	0.304474	0.92045	0.483928	0.928147	1.66334	0.416862
NCBI_Bias2	35	56	21.01	21.01	32.06	23.93	19.63	gi|296473280	glucuronidase, beta [Bos taurus]	Bos taurus	13	1.02802	0.383479	1.02802	0.602439	1.02802	1.27269	0.472367	1.05682	0.153725	1.0666	0.536251	0.990832	0.482325	1.03808	2.8011	0.22313	0.990832	0.831974	0.954993	0.423382	0.954993	0.413508	0.954993	1.51357	0.416862
NCBI_Bias2	187	37	26	26	49.21	40.9	40.9	gi|297489555	PREDICTED: tubulin, beta 2-like [Bos taurus]	Bos taurus	25	0.981748	0.673072	0.981748	0.594274	0.981748	0.795904	0.6703	1.00925	0.82526	1.05682	0.497637	1.04713	0.354564	1.03773	1.67361	0.416862	1.00925	0.773854	0.981748	0.721998	0.981748	0.782112	0.981748	0.496391	0.778801
Uni_Bias2	280	162	9.18	11.29	40.05	21.06	19.44	sp|Q3MHX5|SUCB2_BOVIN	Succinyl-CoA ligase [GDP-forming] subunit beta, mitochondrial OS=Bos taurus GN=SUCLG2 PE=2 SV=1	BOVIN	6	0.912792	0.239311	0.895365	0.284079	0.904078	2.3352	0.286505	0.946031	0.43478	1.02802	0.636006	1.13763	0.141798	1.03722	2.8132	0.22313	1.04777	0.589545	1.00802	0.894788	0.990832	0.969628	0.999426	0.123349	0.9277
Uni_Bias2	425	53	21.84	21.84	30.67	25.15	19.63	tr|A3KMY8|A3KMY8_BOVIN	GUSB protein OS=Bos taurus GN=GUSB PE=2 SV=1	BOVIN	13	1.02628	0.61302	1.01859	0.591853	1.02243	0.880623	0.6376	1.09149	0.0582263	1.03753	0.94861	0.981748	0.297743	1.03692	3.5679	0.153355	1.00264	0.958756	0.940184	0.17763	0.972747	0.422017	0.956466	2.25031	0.286505
Uni_Bias2	816	328	4	4.01	15.28	11.81	11.81	tr|Q32LC3|Q32LC3_BOVIN	Eukaryotic translation initiation factor 1A, X-linked OS=Bos taurus GN=EIF1AX PE=2 SV=1	BOVIN	2	1.04756	0.723787	1.02802	0.935841	1.03779	0.338374	0.8395	1.07231	0.647752	1.03753	0.948848	1	0.993777	1.03661	0.428211	0.7985	1.02693	0.867609	1.00111	0.992922	0.990832	0.980668	0.995969	0.0231261	0.9864
NCBI_Bias2	199	503	1.66	1.67	1.998	0.538	0.538	gi|300795377	insulin receptor-related protein [Bos taurus]	Bos taurus	1	0.963829	0.952068	0.946237	0.931557	0.955033	0.104245	0.9277	0.937562	0.909691	0.990832	0.995301	1.18032	0.730349	1.03624	0.359243	0.7985	1.10662	0.830968	1.1272	0.791746	1.1272	0.793898	1.1272	0.4033	0.7985
Uni_Bias2	149	48	22.33	22.53	40.91	36.15	25.54	sp|P68103|EF1A1_BOVIN	Elongation factor 1-alpha 1 OS=Bos taurus GN=EEF1A1 PE=2 SV=1	BOVIN	14	1.0675	0.198549	1.19124	0.0405819	1.12937	4.1876	0.119433	1.02585	0.604845	1.1272	0.246439	0.954993	0.252465	1.03601	2.84889	0.22313	0.937852	0.253606	0.972988	0.652159	1.00925	0.579459	0.991121	0.845247	0.6376
Uni_Bias2	483	184	7.84	16.12	47.77	40.08	38.06	tr|A7Z057|A7Z057_BOVIN	YWHAG protein OS=Bos taurus GN=YWHAG PE=2 SV=1	BOVIN	10	1.06244	0.58619	0.990832	0.918397	1.02664	0.537862	0.7596	1.06005	0.473601	0.990832	0.958262	1.05682	0.915251	1.0359	0.763126	0.6703	1.02253	0.808498	1.02214	0.778569	1.05682	0.875738	1.03948	0.332658	0.8395
Uni_Bias2	834	360	3.03	3.03	17.96	13.22	11.72	tr|Q3SX36|Q3SX36_BOVIN	TFG protein OS=Bos taurus GN=TFG PE=2 SV=1	BOVIN	3	1.13311	0.308453	1.13763	0.495856	1.13537	1.63091	0.416862	0.983887	0.883687	1.05682	0.724768	1.0666	0.709041	1.03577	0.685662	0.6989	1.01257	0.900364	1.16337	0.228089	1.14815	0.484507	1.15576	1.91319	0.367879
Uni_Bias2	538	377	2.68	3.43	18.25	5.556	5.556	tr|E1BFR2|E1BFR2_BOVIN	Uncharacterized protein OS=Bos taurus PE=3 SV=1	BOVIN	3	0.962524	0.778313	0.972747	0.935417	0.967636	0.275681	0.8395	1.01291	0.919495	1.05682	0.717517	1.03753	0.776305	1.03575	0.581172	0.6989	0.979608	0.873427	0.928329	0.641412	0.963829	0.867894	0.946079	0.508793	0.7596
Uni_Bias2	641	138	10.6	10.62	20.41	16.08	11.55	tr|F1MPB2|F1MPB2_BOVIN	Uncharacterized protein (Fragment) OS=Bos taurus GN=IGF2BP3 PE=4 SV=1	BOVIN	5	0.879504	0.773685	0.972747	0.746164	0.926126	0.477203	0.778801	0.983593	0.959466	1.05682	0.400808	1.05682	0.423788	1.03241	1.57577	0.416862	1.19265	0.37218	1.06315	0.69401	0.972747	0.714364	1.01795	0.60943	0.6989
Uni_Bias2	205	19	34.49	56.9	65.05	57.72	49.92	sp|Q27975|HS71A_BOVIN	Heat shock 70 kDa protein 1A OS=Bos taurus GN=HSPA1A PE=2 SV=2	BOVIN	49	0.989873	0.844977	0.972747	0.68177	0.98131	0.479034	0.778801	1.04584	0.626262	1	0.595259	1.04713	0.169622	1.03099	2.39811	0.286505	1.08225	0.108154	1.02262	0.769836	1.02802	0.396841	1.02532	1.02997	0.535261
Uni_Bias2	400	154	9.59	9.59	37.15	26.39	26.39	sp|Q6QRN6|AIBP_BOVIN	Apolipoprotein A-I-binding protein OS=Bos taurus GN=APOA1BP PE=2 SV=1	BOVIN	6	0.966931	0.648949	0.963829	0.824244	0.96538	0.543468	0.7596	1.03289	0.62492	1.0666	0.537645	0.990832	0.720608	1.03011	1.23196	0.535261	0.972887	0.676227	0.908356	0.22703	0.895365	0.627277	0.90186	1.69291	0.416862
Uni_Bias2	527	187	7.68	7.7	22.27	9.281	6.961	tr|E1BCF2|E1BCF2_BOVIN	Uncharacterized protein OS=Bos taurus GN=CRLF3 PE=4 SV=1	BOVIN	4	0.958189	0.634331	0.981748	0.872809	0.969968	0.51353	0.7596	1.00311	0.963211	1.04713	0.67547	1.03753	0.764973	1.02926	0.606053	0.6989	1.02558	0.710761	0.976998	0.73171	0.972747	0.778109	0.974872	0.489241	0.778801
Uni_Bias2	111	438	2.02	2.02	12.13	4.305	4.305	sp|P31408|VATB2_BOVIN	V-type proton ATPase subunit B, brain isoform OS=Bos taurus GN=ATP6V1B2 PE=1 SV=3	BOVIN	1	1.02368	0.860299	0.972747	0.97727	0.998215	0.150672	0.9048	1.01114	0.961632	1.00925	0.981133	1.0666	0.866172	1.029	0.175318	0.9277	0.997884	0.987198	1.00838	0.958603	1.02802	0.906455	1.0182	0.122029	0.9277
Uni_Bias2	394	431	2.03	2.05	11.11	5.093	5.093	sp|Q5EAD4|ACDSB_BOVIN	Short/branched chain specific acyl-CoA dehydrogenase, mitochondrial OS=Bos taurus GN=ACADSB PE=2 SV=1	BOVIN	1	1.08548		1.05682	0.890902	1.07115	0.10034	0.9277	1.00154		1.05682	0.90297	1.02802	0.938474	1.02879	0.143809	0.9512	0.964065		1.04232		1.03753	0.926223	1.03992	0.0665688	0.9704
NCBI_Bias2	387	292	4.14	4.17	25.38	14.21	10.66	gi|84370063	prefoldin subunit 3 [Bos taurus]	Bos taurus	2	1.02802	0.659135	1.03753	0.742374	1.03277	0.620806	0.6989	1.02802	0.727819	1.00925	0.735953	1.04713	0.67621	1.02813	0.88209	0.6376	1.00925	0.818855	1.01859	0.744825	1.07647	0.682274	1.04753	0.587974	0.6989
NCBI_Bias2	163	32	27.6	27.6	36.87	26.43	24.14	gi|297482024	PREDICTED: polyadenylate-binding protein 1-like [Bos taurus]	Bos taurus	15	0.981748	0.884453	0.972747	0.762869	0.977248	0.341751	0.8395	1.01859	0.487469	1.02802	0.293052	1.03753	0.180136	1.02805	3.17901	0.196912	1.01859	0.624554	0.990832	0.949301	0.981748	0.992986	0.98629	0.0513064	0.9782
Uni_Bias2	829	254	5.52	5.52	29.02	15.73	12.94	tr|Q3SWX4|Q3SWX4_BOVIN	Glioblastoma amplified sequence OS=Bos taurus GN=GBAS PE=2 SV=1	BOVIN	4	0.971344	0.642223	0.963829	0.75336	0.967587	0.630623	0.6989	1.0465	0.475193	1.02802	0.750883	1.00925	0.927082	1.02792	0.96088	0.606531	1.02417	0.700364	0.948274	0.406611	0.946237	0.482083	0.947256	1.4154	0.472367
Uni_Bias2	569	129	11.79	11.8	37.01	20.87	20.87	tr|E1BPL1|E1BPL1_BOVIN	Uncharacterized protein OS=Bos taurus GN=LAD1 PE=4 SV=1	BOVIN	9	0.953796	0.612091	0.954993	0.324561	0.954394	1.40378	0.472367	0.988522	0.886139	1.01859	0.707785	1.07647	0.10068	1.02786	2.3993	0.286505	1.04874	0.386795	1.00932	0.847546	1.01859	0.698609	1.01396	0.455205	0.778801
Uni_Bias2	236	306	4.14	4.14	10.81	6.568	4.449	sp|Q2KJ32|SBP1_BOVIN	Selenium-binding protein 1 OS=Bos taurus GN=SELENBP1 PE=1 SV=1	BOVIN	2	1.10267	0.373658	1.09648	0.237861	1.09958	2.1024	0.324652	1.14404	0.256565	1.07647	0.798422	0.862979	0.233647	1.02783	2.64002	0.25284	0.900118	0.348309	0.865464	0.237153	0.870964	0.409763	0.868214	2.02488	0.324652
Uni_Bias2	267	26	30.85	30.85	66.86	62.13	52.66	sp|Q32LG3|MDHM_BOVIN	Malate dehydrogenase, mitochondrial OS=Bos taurus GN=MDH2 PE=2 SV=1	BOVIN	20	0.976966	0.589734	0.963829	0.588207	0.970398	0.919627	0.606531	1.0354	0.431103	1.00925	0.839637	1.03753	0.928743	1.0274	0.946865	0.606531	1.04344	0.436026	0.982355	0.641976	0.990832	0.801192	0.986593	0.57749	0.6989
Uni_Bias2	467	21	33.84	34.13	42.78	39.92	38.21	tr|A6QNZ7|A6QNZ7_BOVIN	Keratin 10 (Epidermolytic hyperkeratosis; keratosis palmaris et plantaris) OS=Bos taurus GN=KRT10 PE=2 SV=1	BOVIN	33	1.06718	0.425403	1.11686	0.438871	1.09202	1.45773	0.472367	1.15593	0.0375173	1.04713	0.49236	0.879023	0.459699	1.02736	4.14202	0.119433	0.960402	0.606953	0.883908	0.0652449	0.946237	0.514907	0.915072	2.94745	0.22313
NCBI_Bias2	369	484	2	2	9.322	9.322	9.322	gi|81674739	ATPase, H+ transporting, lysosomal 13kDa, V1 subunit G1 [Bos taurus]	Bos taurus	1	1.21339	0.693943	1.20226	0.71042	1.20783	0.614321	0.6989	1.08643	0.855502	1.14815	0.768171	0.847227	0.762691	1.02727	0.599946	0.6989	0.794328	0.670201	0.887156	0.826575	0.887156	0.824354	0.887156	0.333209	0.8395
Uni_Bias2	223	233	6.15	6.15	15.77	15.77	13.39	sp|Q2HJD7|3HIDH_BOVIN	3-hydroxyisobutyrate dehydrogenase, mitochondrial OS=Bos taurus GN=HIBADH PE=2 SV=1	BOVIN	3	1.13514	0.370636	1.03753	0.703155	1.08633	1.168	0.535261	1.05205	0.611462	1.05682	0.572904	0.972747	0.972046	1.02721	0.935723	0.606531	0.880404	0.396881	0.94739	0.591078	0.954993	0.867652	0.951191	0.580018	0.6989
Uni_Bias2	435	118	12.46	12.46	30.46	19.18	16.07	tr|A5D7J6|A5D7J6_BOVIN	CALR protein OS=Bos taurus GN=CALR PE=2 SV=1	BOVIN	8	0.959119	0.513721	0.981748	0.812177	0.970433	0.759244	0.6703	1.06099	0.284941	1	0.533236	1.01859	0.930909	1.02653	1.69883	0.416862	1.10769	0.125875	0.99899	0.984867	1.00925	0.578267	1.00412	0.488988	0.778801
Uni_Bias2	41	482	2	2	14.29	8.571	8.571	sp|O97680|THIO_BOVIN	Thioredoxin OS=Bos taurus GN=TXN PE=3 SV=3	BOVIN	1	0.895175		0.870964	0.803205	0.883069	0.190347	0.9048	0.909587		0.954993	0.941331	1.21339	0.700587	1.02599	0.361591	0.7985	1.13252		1.11187		1.10662	0.825358	1.10925	0.166715	0.9048
NCBI_Bias2	89	35	26.98	27.02	46.86	32.44	20.96	gi|296482467	mitochondrial inner membrane protein [Bos taurus]	Bos taurus	13	1.03753	0.393811	1.02802	0.66147	1.03277	1.1684	0.535261	1.05682	0.332255	1.04713	0.810522	0.972747	0.802138	1.02556	1.33103	0.472367	0.963829	0.651089	0.954993	0.566945	0.963829	0.888017	0.959411	0.596075	0.6989
Uni_Bias2	762	30	30.02	30.02	56.71	49.37	44.81	tr|F2Z4H4|F2Z4H4_BOVIN	Uncharacterized protein (Fragment) OS=Bos taurus GN=ALDOC PE=4 SV=1	BOVIN	17	1.00428	0.956386	0.990832	0.945226	0.997558	0.0876629	0.956	1.02955	0.709889	1.01859	0.67417	1.02802	0.756174	1.02539	0.882838	0.6376	1.04294	0.398212	1.01526	0.820119	1	0.511654	1.00763	0.754294	0.687289
NCBI_Bias2	273	221	6.04	6.04	32.75	24.45	21.83	gi|73587399	Platelet-activating factor acetylhydrolase, isoform Ib, beta subunit 30kDa [Bos taurus]	Bos taurus	4	1.00925	0.868696	1.02802	0.761844	1.01863	0.358532	0.7985	1.00925	0.874029	1.0666	0.59443	1	0.941927	1.02528	0.620712	0.6989	0.972747	0.872922	0.972747	0.878261	0.972747	0.870492	0.972747	0.233224	0.882497
NCBI_Bias2	209	219	6.1	6.1	12.76	9.112	6.834	gi|300798400	cytokine receptor-like factor 3 [Bos taurus]	Bos taurus	4	0.963829	0.825322	0.981748	0.900813	0.972788	0.257483	0.8395	0.990832	0.972244	1.04713	0.665778	1.03753	0.799806	1.02516	0.57182	0.6989	1	0.902222	0.972747	0.894114	0.972747	0.759884	0.972747	0.33572	0.8395
NCBI_Bias2	423	192	7.31	10.59	39.22	30.74	21.91	gi|8810224	voltage-dependent anion channel 3 [Bos taurus]	Bos taurus	5	1.02802	0.713202	1.02802	0.625819	1.02802	0.700678	0.6989	1.03753	0.571112	1.03753	0.770077	1	0.344327	1.02502	1.63955	0.416862	1.00925	0.815939	1	0.978209	0.990832	0.837351	0.995416	0.173322	0.9048
Uni_Bias2	542	277	4.84	4.86	12.08	2.843	2.843	tr|E1BG99|E1BG99_BOVIN	Uncharacterized protein OS=Bos taurus GN=EIF4ENIF1 PE=4 SV=1	BOVIN	3	1.17281	0.11524	1.13763	0.36608	1.15522	2.74964	0.25284	1.06216	0.468513	1.0666	0.607151	0.946237	0.733242	1.025	1.36147	0.472367	0.952406	0.646101	1.0488	0.615577	1.00925	0.915151	1.02903	0.498449	0.778801
NCBI_Bias2	63	30	28.61	28.61	58.52	53.57	48.35	gi|296476838	fructose-bisphosphate aldolase C [Bos taurus]	Bos taurus	16	1	0.938681	1	0.994349	1	0.0598859	0.9704	1.02802	0.398117	1.01859	0.711716	1.02802	0.81633	1.02487	1.27163	0.472367	1.01859	0.29299	0.990832	0.884994	1	0.555192	0.995416	0.617233	0.6989
Uni_Bias2	725	179	8.11	8.11	31.88	21.38	21.38	tr|F1N0L6|F1N0L6_BOVIN	Uncharacterized protein (Fragment) OS=Bos taurus PE=4 SV=1	BOVIN	4	1.13843	0.315368	1.13763	0.0606753	1.13803	3.43634	0.173774	1.04293	0.701948	1.0666	0.439638	0.963829	0.615042	1.02445	1.44339	0.472367	0.957993	0.577883	1.04029	0.850422	1.01859	0.702559	1.02944	0.447365	0.7985
NCBI_Bias2	399	415	2.05	2.07	5.725	2.29	2.29	gi|86438315	Dynein, cytoplasmic 1, light intermediate chain 1 [Bos taurus]	Bos taurus	1	0.903649	0.540086	0.870964	0.485999	0.887307	1.1618	0.535261	0.928966	0.668382	0.963829	0.797971	1.18032	0.438374	1.02437	1.26229	0.472367	1.09648	0.597648	1.05682	0.736581	1.0666	0.725151	1.06171	0.544701	0.7596
NCBI_Bias2	333	261	4.93	4.93	47.59	24.83	24.83	gi|77404233	ubiquitin-conjugating enzyme E2 variant 2 [Bos taurus]	Bos taurus	4	0.928966	0.850025	0.870964	0.805097	0.899965	0.32944	0.8395	0.981748	0.851442	0.963829	0.998	1.1272	0.747153	1.02426	0.39461	0.7985	1.04713	0.754931	0.990832	0.950921	1.01859	0.932447	1.00471	0.104463	0.9277
Uni_Bias2	765	407	2.12	2.12	21.67	8.374	5.419	tr|Q08DW1|Q08DW1_BOVIN	RAB9A, member RAS oncogene family OS=Bos taurus GN=RAB9A PE=2 SV=1	BOVIN	1	1.0545	0.687127	1	0.914654	1.02725	0.403412	0.7985	1.05234	0.697232	1.04713	0.848917	0.972747	0.901727	1.02407	0.545365	0.7596	0.945974	0.674735	0.945649	0.672873	0.928966	0.836506	0.937308	0.499196	0.778801
Uni_Bias2	611	222	6.37	7.67	36.97	25.59	22.27	tr|F1MIR4|F1MIR4_BOVIN	Uncharacterized protein (Fragment) OS=Bos taurus PE=4 SV=1	BOVIN	4	1.02761	0.829369	1.00925	0.366307	1.01843	1.03482	0.535261	1.03278	0.799755	1.04713	0.192045	0.990832	0.971597	1.02358	1.65231	0.416862	0.963961	0.774446	0.956791	0.73325	0.963829	0.536144	0.96031	0.810934	0.6376
Uni_Bias2	352	400	2.19	2.19	17.39	7.826	4.348	sp|Q4U5R4|RN114_BOVIN	RING finger protein 114 OS=Bos taurus GN=RNF114 PE=2 SV=1	BOVIN	1	1.11691	0.312794	1.0666	0.532432	1.09175	1.55696	0.416862	1.05738	0.568181	1.0666	0.528964	0.946237	0.718908	1.0234	1.33083	0.472367	0.857684	0.204645	0.903821	0.375095	0.946237	0.714465	0.925029	1.14376	0.535261
NCBI_Bias2	217	80	17.04	17.04	30.45	21.81	19.25	gi|329663954	dihydrolipoyl dehydrogenase, mitochondrial [Bos taurus]	Bos taurus	9	0.990832	0.99026	0.990832	0.982395	0.990832	0.0239296	0.9864	1	0.937673	1.03753	0.460846	1.02802	0.570302	1.02185	1.21658	0.535261	0.981748	0.895677	0.972747	0.824866	0.981748	0.842931	0.977248	0.315648	0.8395
Uni_Bias2	679	470	2	2	6.522	2.415	2.415	tr|F1MVL2|F1MVL2_BOVIN	Uncharacterized protein (Fragment) OS=Bos taurus GN=ACADS PE=4 SV=1	BOVIN	1	1.12747	0.4466	1.07647	0.864699	1.10197	0.826432	0.6376	1.07262	0.614943	1.09648	0.843845	0.895365	0.836778	1.02149	0.724586	0.687289	0.790736	0.259013	0.829118	0.31532	0.879023	0.816383	0.85407	1.17871	0.535261
Uni_Bias2	152	246	5.86	5.86	32.75	24.45	21.83	sp|P68401|PA1B2_BOVIN	Platelet-activating factor acetylhydrolase IB subunit beta OS=Bos taurus GN=PAFAH1B2 PE=1 SV=1	BOVIN	4	1.01531	0.839005	1.02802	0.768682	1.02167	0.380977	0.7985	1.00755	0.908463	1.05682	0.600224	1	0.925177	1.02146	0.594309	0.6989	0.987118	0.856205	0.992173	0.904627	0.972747	0.88678	0.98246	0.191429	0.9048
Uni_Bias2	16	101	15.06	15.06	49.64	44.29	36.79	sp|A5D989|EF1D_BOVIN	Elongation factor 1-delta OS=Bos taurus GN=EEF1D PE=2 SV=2	BOVIN	10	1.04152	0.769026	0.981748	0.872749	1.01163	0.346339	0.8395	0.967649	0.620798	1.02802	0.434601	1.0666	0.178666	1.02075	2.63383	0.25284	0.937742	0.721651	1.00305	0.976914	1.01859	0.620181	1.01082	0.43525	0.7985
Uni_Bias2	810	267	5.16	5.16	51.02	34.01	34.01	tr|Q2NKU4|Q2NKU4_BOVIN	Calcium regulated heat stable protein 1, 24kDa OS=Bos taurus GN=CARHSP1 PE=2 SV=1	BOVIN	5	1.10673	0.518864	1.05682	0.850742	1.08177	0.710298	0.6989	1.16592	0.641235	0.937562	0.936302	0.954993	0.997719	1.01949	0.445117	0.7985	0.961037	0.775665	0.910707	0.686736	1.07647	0.910177	0.993586	0.408169	0.7985
Uni_Bias2	294	123	12.05	12.05	41.73	41.73	36.22	sp|Q3SZ62|PGAM1_BOVIN	Phosphoglycerate mutase 1 OS=Bos taurus GN=PGAM1 PE=2 SV=3	BOVIN	6	1.05082	0.4194	1.01859	0.748303	1.03471	1.00659	0.535261	1.00214	0.971535	1.02802	0.645467	1.02802	0.649426	1.01939	0.780276	0.6703	0.9502	0.465862	0.993402	0.91143	1.01859	0.752543	1.006	0.32749	0.8395
Uni_Bias2	211	140	10.55	10.55	29.74	25.86	23.28	sp|Q29460|PA1B3_BOVIN	Platelet-activating factor acetylhydrolase IB subunit gamma OS=Bos taurus GN=PAFAH1B3 PE=1 SV=1	BOVIN	5	0.978152	0.756273	0.963829	0.493296	0.970991	0.856428	0.6376	1.03	0.67705	1.02802	0.903275	1	0.798333	1.01934	0.62275	0.6989	1.01254	0.861404	0.9589	0.612204	0.937562	0.635445	0.948231	0.820051	0.6376
Uni_Bias2	685	22	32.32	32.32	55.4	50.42	45.43	tr|F1MWC2|F1MWC2_BOVIN	Uncharacterized protein OS=Bos taurus GN=LDHA PE=4 SV=1	BOVIN	19	1.01378	0.825332	1	0.659315	1.00689	0.528556	0.7596	1.04734	0.443743	1.01859	0.621031	0.990832	0.828295	1.01892	1.28314	0.472367	0.991436	0.899121	0.957477	0.323882	0.972747	0.786411	0.965112	1.18793	0.535261
Uni_Bias2	487	486	2	2	6.322	6.322	6.322	tr|A8PVV5|A8PVV5_BOVIN	SYPL1 protein OS=Bos taurus GN=SYPL1 PE=2 SV=1	BOVIN	1	0.600647		0.586138	0.408438	0.593393	0.777749	0.6703	0.803127		0.847227	0.752064	1.40605	0.537744	1.0188	0.786339	0.6703	1.31394		0.980283		0.972747	0.974327	0.976515	0.0225907	0.9864
Uni_Bias2	439	337	3.68	3.68	9.831	8.475	8.475	tr|A5D7S0|A5D7S0_BOVIN	NAPA protein OS=Bos taurus GN=NAPA PE=2 SV=1	BOVIN	2	0.984915	0.932133	0.963829	0.889668	0.974372	0.162588	0.9048	1.00828	0.949194	1	0.891608	1.04713	0.994587	1.01847	0.149656	0.9512	1.02569	0.848846	0.998875	0.993098	1	0.992588	0.999437	0.0124776	0.9864
Uni_Bias2	229	487	2	2	5.305	5.305	5.305	sp|Q2KHV4|PARL_BOVIN	Presenilins-associated rhomboid-like protein, mitochondrial OS=Bos taurus GN=PARL PE=2 SV=1	BOVIN	1	1.67289		1.45881	0.422679	1.56585	0.747978	0.687289	1.12905		1.11686	0.725655	0.809096	0.52825	1.01834	0.832861	0.6376	0.648755		0.958905		1.0666	0.938644	1.01275	0.0549984	0.9704
NCBI_Bias2	81	433	2.02	2.02	10.71	4.911	4.911	gi|296481194	charged multivesicular body protein 4b [Bos taurus]	Bos taurus	1	1.01859	0.931622	1.13763	0.779672	1.07811	0.277697	0.8395	0.963829	0.921543	1.19124	0.724324	0.895365	0.839543	1.01681	0.503018	0.7596	0.928966	0.82648	0.981748	0.969574	0.862979	0.780457	0.922363	0.242141	0.882497
Uni_Bias2	736	100	15.08	15.08	29.81	21.35	15.19	tr|F1N206|F1N206_BOVIN	Uncharacterized protein (Fragment) OS=Bos taurus GN=DLD PE=4 SV=1	BOVIN	9	0.971235	0.517872	0.990832	0.952268	0.981034	0.614037	0.6989	0.984826	0.732966	1.03753	0.467585	1.02802	0.527202	1.01679	1.48616	0.472367	1.00791	0.859748	0.991553	0.849335	0.981748	0.874655	0.98665	0.258169	0.8395
NCBI_Bias2	71	420	2.04	2.04	14.16	3.922	2.397	gi|296478965	ladinin 1 [Bos taurus]	Bos taurus	1	0.972747	0.959012	0.954993	0.986735	0.96387	0.0479513	0.9746	0.981748	0.889641	1.00925	0.670358	1.05682	0.622619	1.01594	0.860513	0.6376	1.00925	0.84254	1.00925	0.91028	1	0.920961	1.00463	0.153167	0.9048
NCBI_Bias2	247	509	1.57	1.57	3.846	2.198	2.198	gi|61842997	PREDICTED: growth differentiation factor 3 [Bos taurus]	Bos taurus	1	0.937562	0.723735	0.928966	0.819693	0.933264	0.453538	0.778801	0.946237	0.769583	0.963829	0.928488	1.13763	0.656513	1.0159	0.65745	0.6989	1.05682	0.69951	1.04713	0.743787	1.08643	0.746553	1.06678	0.510982	0.7596
NCBI_Bias2	253	170	8.15	15.92	37.65	32.39	30.36	gi|71153781	RecName: Full=14-3-3 protein gamma; AltName: Full=Protein kinase C inhibitor protein 1; Short=KCIP-1; Contains: RecName: Full=14-3-3 protein gamma, N-terminally processed	BOVIN	9	1	0.748288	0.990832	0.910468	0.995416	0.333333	0.8395	1	0.775759	0.990832	0.952767	1.05682	0.921314	1.01588	0.333757	0.8395	1.05682	0.844115	1.05682	0.815644	1.05682	0.879291	1.05682	0.288733	0.8395
NCBI_Bias2	75	272	4.61	6.11	35.98	28.57	24.87	gi|296480621	RAB2A, member RAS oncogene family [Bos taurus]	Bos taurus	4	1.01859	0.926311	1.01859	0.288122	1.01859	1.14733	0.535261	1.01859	0.926008	1.04713	0.17113	0.981748	0.884118	1.01582	1.7071	0.416862	0.963829	0.918413	0.954993	0.918111	0.954993	0.49529	0.954993	0.68449	0.6989
NCBI_Bias2	49	267	4.78	4.78	14.5	4.75	4.75	gi|296474657	transmembrane protein 43 [Bos taurus]	Bos taurus	3	0.981748	0.973699	0.981748	0.845886	0.981748	0.168527	0.9048	1	0.965125	1.02802	0.922562	1.01859	0.897889	1.01554	0.194396	0.9277	1	0.972199	0.981748	0.966623	0.981748	0.976389	0.981748	0.0502397	0.9782
Uni_Bias2	362	291	4.45	4.46	28.1	17.65	13.07	sp|Q5E963|ARP5L_BOVIN	Actin-related protein 2/3 complex subunit 5-like protein OS=Bos taurus GN=ARPC5L PE=2 SV=1	BOVIN	2	1.10906	0.411938	0.972747	0.841184	1.0409	0.920555	0.606531	1.00906	0.931193	1.01859	0.820672	1.01859	0.724961	1.01542	0.512952	0.7596	0.934024	0.71217	1.02332	0.772756	0.981748	0.943024	1.00253	0.27487	0.8395
Uni_Bias2	774	278	4.8	4.8	20.42	11.07	11.07	tr|Q0P5D6|Q0P5D6_BOVIN	Retinoic acid receptor responder (Tazarotene induced) 1 OS=Bos taurus GN=RARRES1 PE=2 SV=1	BOVIN	3	0.970207	0.761981	0.937562	0.762878	0.953884	0.471202	0.778801	0.93813	0.538434	1	0.975099	1.10662	0.578838	1.01492	1.03452	0.535261	1.03596	0.725048	1.06857	0.582723	1.03753	0.808263	1.05305	0.65397	0.6989
Uni_Bias2	445	166	8.91	8.91	24.91	19.13	19.13	tr|A5D9H1|A5D9H1_BOVIN	Inositol(Myo)-1(Or 4)-monophosphatase 1 OS=Bos taurus GN=IMPA1 PE=2 SV=1	BOVIN	5	1.01505	0.852847	1.03753	0.145562	1.02629	1.81216	0.367879	1.06886	0.432822	1.03753	0.814488	0.937562	0.312666	1.01465	1.91545	0.367879	1.01256	0.884848	0.959041	0.611523	0.937562	0.392787	0.948301	1.23886	0.535261
Uni_Bias2	693	208	6.95	6.95	17.65	12.75	12.75	tr|F1MWP9|F1MWP9_BOVIN	Uncharacterized protein OS=Bos taurus GN=CNDP1 PE=4 SV=1	BOVIN	4	1.0158	0.865954	1.02802	0.903382	1.02191	0.213268	0.882497	0.97385	0.88535	1.09648	0.737075	0.972747	0.925245	1.01436	0.438232	0.7985	0.952987	0.781913	0.993291	0.942145	0.912011	0.900028	0.952651	0.143253	0.9277
Uni_Bias2	441	142	10.36	10.36	39.81	33.01	29.61	tr|A5D977|A5D977_BOVIN	RALB protein OS=Bos taurus GN=RALB PE=2 SV=1	BOVIN	6	1.07766	0.342435	1.05682	0.458085	1.06724	1.60895	0.416862	1.05104	0.530856	1.00925	0.850713	0.981748	0.89323	1.01401	0.788554	0.6703	0.996646	0.961884	1.01954	0.818942	1.02802	0.398838	1.02378	0.971901	0.606531
Uni_Bias2	460	281	4.71	4.71	26.27	8.193	8.193	tr|A6QLG3|A6QLG3_BOVIN	PDK3 protein OS=Bos taurus GN=PDK3 PE=2 SV=1	BOVIN	3	1.09152	0.392373	1.04713	0.785571	1.06932	1.02223	0.535261	1.04602	0.634041	1.0666	0.704381	0.928966	0.727056	1.01386	0.977014	0.606531	0.869376	0.226243	0.905049	0.343254	0.903649	0.650002	0.904349	1.30294	0.472367
Uni_Bias2	154	370	2.9	2.94	12.62	9.635	4.983	sp|P79136|CAPZB_BOVIN	F-actin-capping protein subunit beta OS=Bos taurus GN=CAPZB PE=1 SV=1	BOVIN	2	0.950314		0.928966	0.894866	0.93964	0.0964836	0.9512	0.975147		1.02802	0.945776	1.03753	0.928493	1.01356	0.112866	0.9512	0.970065		0.94306		0.937562	0.91192	0.940311	0.0800863	0.9608
Uni_Bias2	317	342	3.5	3.86	11.18	8.946	7.029	sp|Q3T0M2|SFXN4_BOVIN	Sideroflexin-4 OS=Bos taurus GN=SFXN4 PE=2 SV=1	BOVIN	2	1.05672	0.7124	1.10662	0.715787	1.08167	0.584984	0.6989	1.10913	0.33917	1.01859	0.695505	0.912011	0.937222	1.01325	1.31088	0.472367	0.96762	0.839437	0.920091	0.422365	0.981748	0.912254	0.950919	0.828392	0.6376
Uni_Bias2	272	300	4.26	4.26	12.34	10.06	8.442	sp|Q3B7M2|GLO2_BOVIN	Hydroxyacylglutathione hydrolase, mitochondrial OS=Bos taurus GN=HAGH PE=2 SV=3	BOVIN	2	1.00042	0.997427	1.01859	0.947508	1.0095	0.0490715	0.9746	0.974123	0.842372	1.03753	0.909966	1.02802	0.925954	1.01322	0.297763	0.882497	1.00366	0.977461	1.02823	0.833049	1.00925	0.963686	1.01874	0.190788	0.9048
NCBI_Bias2	341	201	6.87	6.87	14.1	9.192	6.973	gi|77736155	dolichyl-diphosphooligosaccharide--protein glycosyltransferase subunit 2 [Bos taurus]	Bos taurus	3	1.02802	0.553269	1.03753	0.302114	1.03277	1.55379	0.416862	1.04713	0.388813	1.03753	0.769743	0.954993	0.307197	1.01322	2.07299	0.324652	0.972747	0.788848	0.954993	0.577325	0.954993	0.470316	0.954993	1.13238	0.535261
NCBI_Bias2	329	21	34.31	34.31	54.62	49.08	49.08	gi|76628634	PREDICTED: Astacin-like metalloendopeptidase-like [Bos taurus]	Bos taurus	36	1.00925	0.967519	1.00925	0.941337	1.00925	0.0811905	0.956	1.0666	0.575153	0.990832	0.932065	0.981748	0.862292	1.01306	0.670233	0.6989	1.05682	0.415102	1	0.822563	1	0.930953	1	0.231807	0.882497
NCBI_Bias2	413	206	6.64	6.64	28.7	20.37	12.96	gi|86823923	Protein phosphatase 2A activator, regulatory subunit 4 [Bos taurus]	Bos taurus	3	0.972747	0.806797	0.954993	0.558614	0.96387	0.692247	0.6989	1.00925	0.764769	1	0.709453	1.02802	0.485453	1.01242	1.1588	0.535261	1	0.882962	0.963829	0.692471	0.981748	0.770846	0.972788	0.545262	0.7596
Uni_Bias2	237	202	7.07	7.09	30.56	20.37	12.96	sp|Q2KJ44|PTPA_BOVIN	Serine/threonine-protein phosphatase 2A activator OS=Bos taurus GN=PPP2R4 PE=2 SV=1	BOVIN	3	0.943422	0.469989	0.954993	0.514218	0.949208	1.23353	0.535261	1.00856	0.897758	1	0.732341	1.02802	0.444151	1.01219	1.06919	0.535261	1.05863	0.378643	0.987664	0.83413	0.981748	0.813336	0.984706	0.336992	0.8395
Uni_Bias2	374	347	3.37	3.37	36.56	20.26	7.489	sp|Q5E9D3|CHCH3_BOVIN	Coiled-coil-helix-coiled-coil-helix domain-containing protein 3, mitochondrial OS=Bos taurus GN=CHCHD3 PE=2 SV=1	BOVIN	2	0.992716	0.914882	0.990832	0.871975	0.991774	0.196262	0.9048	1.0082	0.904933	1.02802	0.293914	1	0.875473	1.01207	1.26584	0.472367	0.998811	0.986847	0.981293	0.782887	0.972747	0.599967	0.97702	0.656347	0.6989
Uni_Bias2	450	228	6.26	6.28	21.25	20	16.25	tr|A5PKG2|A5PKG2_BOVIN	PAIP1 protein OS=Bos taurus GN=PAIP1 PE=2 SV=1	BOVIN	5	0.941196	0.568536	0.963829	0.596373	0.952513	0.939447	0.606531	0.975133	0.700868	1.00925	0.904418	1.04713	0.423697	1.0105	1.14188	0.535261	1.03202	0.628153	0.993027	0.934316	1	0.68917	0.996513	0.382359	0.7985
Uni_Bias2	596	87	17.08	17.08	23.94	16.33	13.47	tr|F1MFX7|F1MFX7_BOVIN	Uncharacterized protein OS=Bos taurus GN=UHRF2 PE=4 SV=1	BOVIN	9	1.06332	0.220471	0.990832	0.859021	1.02708	1.44529	0.472367	1.03122	0.580079	1.00925	0.723302	0.990832	0.773812	1.01043	0.977114	0.606531	0.907253	0.102506	0.933298	0.281741	0.972747	0.643466	0.953023	1.48325	0.472367
Uni_Bias2	564	299	4.26	4.26	22.49	17.33	15.2	tr|E1BNQ4|E1BNQ4_BOVIN	Uncharacterized protein OS=Bos taurus GN=CARKD PE=4 SV=1	BOVIN	3	1.08625	0.676729	1.04713	0.701405	1.06669	0.647232	0.6989	1.01929	0.853766	1.05682	0.64132	0.954993	0.796956	1.01037	0.720303	0.687289	0.913833	0.417677	0.971141	0.823877	0.946237	0.731493	0.958689	0.439854	0.7985
Uni_Bias2	298	245	5.88	5.88	30.03	24.75	19.8	sp|Q3SZ73|ABHDB_BOVIN	Abhydrolase domain-containing protein 11 OS=Bos taurus GN=ABHD11 PE=2 SV=1	BOVIN	5	0.980166	0.787019	1.01859	0.821856	0.999379	0.378439	0.7985	1.02972	0.697301	1.02802	0.758199	0.972747	0.585768	1.01016	1.01814	0.535261	1.01529	0.840705	0.964218	0.629364	0.963829	0.885894	0.964023	0.507433	0.7596
NCBI_Bias2	77	96	14.95	14.95	25.27	19.47	16.17	gi|296480787	eukaryotic translation elongation factor 1 delta (guanine nucleotide exchange protein) isoform 2 [Bos taurus]	Bos taurus	10	1.00925	0.806668	1.00925	0.976978	1.00925	0.206841	0.882497	0.972747	0.71033	1.01859	0.461293	1.03753	0.25179	1.00962	2.16705	0.324652	0.981748	0.991534	1.01859	0.495965	1.02802	0.577516	1.0233	1.08597	0.535261
NCBI_Bias2	345	314	3.93	3.93	17.13	14.81	11.57	gi|77736355	GTP-binding nuclear protein Ran [Bos taurus]	Bos taurus	3	0.981748	0.929791	0.981748	0.96509	0.981748	0.0940934	0.9512	0.981748	0.956605	1.02802	0.819293	1.01859	0.872925	1.00945	0.329703	0.8395	0.990832	0.994143	0.990832	0.967243	0.972747	0.910247	0.98179	0.11061	0.9277
NCBI_Bias2	23	36	26.35	26.35	58.43	54.82	49.4	gi|296471847	L-lactate dehydrogenase A chain [Bos taurus]	Bos taurus	20	1	0.400338	1	0.496678	1	1.403	0.472367	1	0.409772	1.02802	0.285514	1	0.940374	1.00934	1.91706	0.367879	0.981748	0.430527	0.981748	0.440422	0.981748	0.739387	0.981748	0.974519	0.606531
Uni_Bias2	252	205	7.02	7.07	29.57	24.35	20.87	sp|Q2TBG8|UCHL3_BOVIN	Ubiquitin carboxyl-terminal hydrolase isozyme L3 OS=Bos taurus GN=UCHL3 PE=2 SV=1	BOVIN	6	0.954023	0.464988	0.954993	0.511612	0.954508	1.24723	0.535261	1	1	1	0.859511	1.02802	0.493351	1.00934	0.745186	0.687289	1.04319	0.705555	0.994291	0.926979	0.981748	0.904319	0.988019	0.153217	0.9048
Uni_Bias2	76	293	4.39	4.41	33.98	15.04	15.04	sp|P11966|ODPB_BOVIN	Pyruvate dehydrogenase E1 component subunit beta, mitochondrial OS=Bos taurus GN=PDHB PE=1 SV=2	BOVIN	4	1.00801	0.951892	1	0.951633	1.00401	0.0858862	0.956	0.990294	0.941604	1.01859	0.941587	1.01859	0.957093	1.00916	0.142634	0.9512	0.972885	0.837743	0.987938	0.927496	0.990832	0.967174	0.989385	0.0943669	0.9512
NCBI_Bias2	221	352	2.83	2.87	16.92	11.15	4.615	gi|329664174	dnaJ homolog subfamily C member 9 [Bos taurus]	Bos taurus	1	0.963829	0.944519	0.963829	0.870614	0.963829	0.169927	0.9048	0.937562	0.708352	0.990832	0.995519	1.09648	0.517803	1.00829	0.875074	0.6376	1.01859	0.91975	1.04713	0.685983	1.07647	0.622155	1.0618	0.739575	0.687289
Uni_Bias2	245	286	4.62	4.62	11.13	8.438	4.668	sp|Q2NL29|INO1_BOVIN	Inositol-3-phosphate synthase 1 OS=Bos taurus GN=ISYNA1 PE=2 SV=1	BOVIN	2	0.99952	0.995046	1	0.89207	0.99976	0.103516	0.9277	1.01444	0.912033	1	0.77807	1.00925	0.944013	1.0079	0.347985	0.8395	1.03205	0.797122	1.01507	0.834036	1.00925	0.926175	1.01216	0.224244	0.882497
Uni_Bias2	451	170	8.69	10.62	48.59	30.63	21.83	tr|A6H783|A6H783_BOVIN	VDAC5P protein OS=Bos taurus GN=VDAC5P PE=2 SV=1	BOVIN	5	1.02147	0.777539	1.00925	0.707814	1.01536	0.518717	0.7596	1.04146	0.538216	1	0.4615	0.981748	0.255939	1.00774	2.39347	0.286505	1.00975	0.905193	0.987975	0.893912	0.990832	0.999145	0.989404	0.098153	0.9512
NCBI_Bias2	331	316	3.87	3.89	9.146	3.659	2.134	gi|76639581	PREDICTED: eukaryotic translation initiation factor 4E nuclear import factor 1 isoform 2 [Bos taurus]	Bos taurus	2	1.15878	0.422888	1.13763	0.364949	1.1482	1.62308	0.416862	1.01859	0.877191	1.0666	0.608298	0.937562	0.720874	1.00758	0.82986	0.6376	0.895365	0.573924	1.00925	0.905907	1	0.925127	1.00463	0.153429	0.9048
Uni_Bias2	624	435	2.02	2.11	14.14	3.722	3.722	tr|F1MLV1|F1MLV1_BOVIN	Uncharacterized protein OS=Bos taurus GN=PSMC6 PE=4 SV=1	BOVIN	1	1.10252		1.07647	0.866482	1.08949	0.124481	0.9277	1.03073		1.08643	0.8579	0.903649	0.846514	1.00693	0.277858	0.882497	0.842997		0.899517		0.895365	0.838059	0.897441	0.153451	0.9048
Uni_Bias2	479	120	12.33	51.16	63.84	52.36	42.92	tr|A7E3Q2|A7E3Q2_BOVIN	Heat shock 70kDa protein 1A OS=Bos taurus GN=HSPA2 PE=2 SV=1	BOVIN	45	0.94972	0.402411	0.972747	0.568144	0.961234	1.28174	0.472367	1.02038	0.736982	1.00925	0.647497	0.990832	0.623951	1.00682	1.05231	0.535261	1.01921	0.756795	0.946372	0.373668	0.954993	0.590484	0.950682	1.31261	0.472367
NCBI_Bias2	295	355	2.77	2.82	13.95	4.983	4.983	gi|74354308	Capping protein (actin filament) muscle Z-line, beta [Bos taurus]	Bos taurus	2	0.946237	0.920958	0.928966	0.900679	0.937602	0.16238	0.9048	0.963829	0.961519	1.02802	0.943061	1.02802	0.936436	1.00662	0.142049	0.9512	0.963829	0.949973	0.937562	0.909561	0.937562	0.907213	0.937562	0.166918	0.9048
NCBI_Bias2	133	138	10.5	10.5	39.81	33.01	29.61	gi|296490482	v-ral simian leukemia viral oncogene homolog B [Bos taurus]	Bos taurus	5	1.0666	0.541838	1.05682	0.424364	1.06171	1.27678	0.472367	1.03753	0.741867	1.00925	0.869891	0.972747	0.85712	1.00651	0.514335	0.7596	0.972747	0.954619	1	0.813158	1.01859	0.419997	1.0093	0.933158	0.606531
Uni_Bias2	618	421	2.07	2.07	3.784	2.162	2.162	tr|F1MKK5|F1MKK5_BOVIN	Uncharacterized protein (Fragment) OS=Bos taurus PE=4 SV=1	BOVIN	1	0.949557	0.703355	0.928966	0.811859	0.939262	0.48669	0.778801	0.917274	0.641744	0.963829	0.922922	1.13763	0.648803	1.00624	0.830721	0.6376	1.06898	0.633224	1.10365	0.666527	1.09648	0.740069	1.10007	0.613821	0.6989
NCBI_Bias2	9	111	13.55	13.63	30.19	20.93	13.55	gi|156121185	ubiquitin-like with PHD and ring finger domains 2 [Bos taurus]	Bos taurus	7	0.981748	0.808838	0.981748	0.977186	0.981748	0.204322	0.882497	1	0.886351	1.01859	0.708738	1	0.933523	1.0062	0.463567	0.778801	0.990832	0.852559	0.972747	0.571346	0.972747	0.668927	0.972747	0.835445	0.6376
Uni_Bias2	370	155	9.51	9.51	44.19	34.3	34.3	sp|Q5E984|TCTP_BOVIN	Translationally-controlled tumor protein OS=Bos taurus GN=TPT1 PE=2 SV=1	BOVIN	7	1.02642	0.68951	1.00925	0.648304	1.01784	0.699361	0.6989	0.980634	0.765679	1.01859	0.570689	1.01859	0.74646	1.00594	0.973094	0.606531	0.975205	0.699402	1.01784	0.813961	1.00925	0.834523	1.01355	0.335916	0.8395
Uni_Bias2	438	102	14.83	14.85	47.78	32.22	32.22	tr|A5D7M4|A5D7M4_BOVIN	YBX2 protein OS=Bos taurus GN=YBX2 PE=2 SV=1	BOVIN	14	0.964446	0.56359	0.963829	0.745931	0.964137	0.752676	0.6703	0.970365	0.646266	1	0.681811	1.04713	0.297911	1.00583	1.76368	0.367879	1.0585	0.497989	1.05029	0.344596	1.01859	0.729637	1.03444	1.19917	0.535261
Uni_Bias2	174	410	2.1	2.1	18.09	9.22	5.674	sp|Q08E20|ESTD_BOVIN	S-formylglutathione hydrolase OS=Bos taurus GN=ESD PE=2 SV=1	BOVIN	2	0.999656	0.997789	1.00925	0.919851	1.00445	0.0744874	0.9608	0.979495	0.906965	1.01859	0.883394	1.01859	0.886869	1.00556	0.296791	0.882497	0.998711	0.994417	1.01693	0.878047	1.00925	0.923364	1.01309	0.182219	0.9048
Uni_Bias2	657	43	24.02	24.12	34.06	17.69	15.61	tr|F1MSC6|F1MSC6_BOVIN	Uncharacterized protein OS=Bos taurus GN=LIG1 PE=4 SV=1	BOVIN	13	1.01386	0.783377	1	0.891555	1.00693	0.311762	0.8395	1.01472	0.775658	1.01859	0.820237	0.981748	0.28879	1.00502	1.47162	0.472367	0.963704	0.548707	0.96072	0.407956	0.963829	0.195096	0.962275	2.19828	0.324652
Uni_Bias2	182	386	2.54	2.54	7.601	3.378	2.365	sp|Q0VCK0|PUR9_BOVIN	Bifunctional purine biosynthesis protein PURH OS=Bos taurus GN=ATIC PE=2 SV=1	BOVIN	2	1.02747	0.875316	0.887156	0.754247	0.957314	0.360642	0.7985	0.994243	0.942398	0.981748	0.76613	1.03753	0.778498	1.00451	0.500412	0.7596	0.902448	0.514151	0.930154	0.397037	0.937562	0.742105	0.933858	1.06141	0.535261
Uni_Bias2	871	387	2.5	2.5	28.65	15.79	7.602	tr|Q862H8|Q862H8_BOVIN	Similar to 40S ribosomal protein SA (P40) (Fragment) OS=Bos taurus PE=2 SV=1	BOVIN	1	0.908929	0.710224	0.972747	0.915477	0.940838	0.373914	0.7985	0.984514	0.900293	1.04713	0.891033	0.981748	0.998791	1.00446	0.192495	0.9277	1.04184	0.896168	0.959354	0.748384	0.92045	0.807985	0.939902	0.436945	0.7985
NCBI_Bias2	279	121	12.14	12.29	20.77	12.44	10.64	gi|74268076	Aconitase 2, mitochondrial [Bos taurus]	Bos taurus	8	0.937562	0.263568	0.937562	0.216256	0.937562	2.48828	0.286505	0.954993	0.440002	0.990832	0.909532	1.0666	0.171601	1.00414	2.32642	0.286505	1.02802	0.473948	1.00925	0.733165	1.00925	0.684416	1.00925	0.598956	0.6989
NCBI_Bias2	3	285	4.26	4.26	31.01	16.52	14.49	gi|119904968	PREDICTED: carbohydrate kinase domain containing-like isoform 1 [Bos taurus]	Bos taurus	3	1.03753	0.69946	1.04713	0.688307	1.04233	0.63491	0.6989	1	0.922005	1.05682	0.632552	0.954993	0.7791	1.00394	0.685154	0.6989	0.912011	0.499332	0.946237	0.67682	0.946237	0.718338	0.946237	0.626396	0.6989
Uni_Bias2	368	177	8.21	8.21	44	36	28.89	sp|Q5E983|EF1B_BOVIN	Elongation factor 1-beta OS=Bos taurus GN=EEF1B PE=2 SV=3	BOVIN	6	0.942613	0.413308	0.737904	0.381982	0.840259	1.60337	0.416862	0.943489	0.557872	0.981748	0.893038	1.08643	0.813128	1.00389	0.784872	0.6703	0.953582	0.506129	0.950643	0.481604	0.831764	0.598362	0.891204	1.08069	0.535261
Uni_Bias2	418	198	7.22	11.36	48.17	38.07	34.86	sp|Q9N0V4|GSTM1_BOVIN	Glutathione S-transferase Mu 1 OS=Bos taurus GN=GSTM1 PE=1 SV=3	BOVIN	11	0.933555	0.480677	0.972747	0.833973	0.953151	0.79399	0.6703	0.972265	0.754279	1.03753	0.586633	1	0.890786	1.00326	0.808656	0.6376	1.02896	0.745366	0.985801	0.855068	0.937562	0.54018	0.961682	0.670921	0.6989
Uni_Bias2	654	402	2.18	2.18	5.993	2.622	1.311	tr|F1MRQ1|F1MRQ1_BOVIN	Uncharacterized protein (Fragment) OS=Bos taurus PE=4 SV=1	BOVIN	1	0.99738	0.982854	0.963829	0.882399	0.980605	0.123692	0.9277	0.951342	0.62915	0.981748	0.974364	1.07647	0.671577	1.00319	0.770856	0.6703	1.00839	0.945022	1.05525	0.589395	1.05682	0.75297	1.05603	0.705633	0.6989
Uni_Bias2	704	302	4.18	4.18	27.29	6.949	5.593	tr|F1MXQ7|F1MXQ7_BOVIN	Uncharacterized protein OS=Bos taurus PE=4 SV=1	BOVIN	2	1.12502	0.216612	1.10662	0.617495	1.11582	1.74737	0.416862	1.05924	0.529821	1.0666	0.725897	0.879023	0.592184	1.00162	1.28508	0.472367	0.857206	0.136674	0.908177	0.298629	0.912011	0.697842	0.910094	1.36222	0.472367
NCBI_Bias2	407	303	4.04	4.04	21.9	21.9	17.14	gi|86821518	Cytochrome c, somatic [Bos taurus]	Bos taurus	2	0.92045	0.634678	0.887156	0.61089	0.903803	0.822967	0.6376	0.912011	0.604395	0.954993	0.876264	1.13763	0.55186	1.00154	1.06843	0.535261	1.04713	0.709322	1.05682	0.674599	1.04713	0.788413	1.05197	0.548401	0.7596
Uni_Bias2	30	111	14.04	14.04	24.07	22.22	22.22	sp|O02739|SPB6_BOVIN	Serpin B6 OS=Bos taurus GN=SERPINB6 PE=2 SV=1	BOVIN	7	1.0708	0.34528	1.02802	0.422208	1.04941	1.67261	0.416862	1.02252	0.74011	1.00925	0.673782	0.972747	0.399683	1.00151	1.40094	0.472367	0.943968	0.401559	0.985558	0.878693	0.981748	0.499288	0.983653	0.715624	0.6989
Uni_Bias2	768	439	2.02	2.02	8.482	4.911	4.911	tr|Q08E32|Q08E32_BOVIN	CHMP4B protein OS=Bos taurus GN=CHMP4B PE=2 SV=2	BOVIN	1	1.03486	0.791914	0.990832	0.989663	1.01284	0.211669	0.882497	0.984404	0.913759	1.00925	0.948003	1.00925	0.93906	1.00097	0.17933	0.9277	0.927592	0.592741	0.972862	0.830528	0.990832	0.998676	0.981847	0.162442	0.9048
NCBI_Bias2	433	124	12.02	12.02	38.52	36.75	27.92	gi|90111863	RecName: Full=Voltage-dependent anion-selective channel protein 1; Short=VDAC-1; AltName: Full=Brain-derived voltage-dependent anion channel 1; Short=BR1-VDAC; AltName: Full=Plasmalemmal porin	BOVIN	7	1.01859	0.78235	1.04713	0.94142	1.03286	0.26563	0.8395	1.00925	0.895268	1.04713	0.935939	0.946237	0.966938	1.00087	0.182802	0.9277	0.954993	0.941361	0.972747	0.94198	0.946237	0.961436	0.959492	0.0860762	0.9608
Uni_Bias2	804	428	2.04	2.04	10.9	3.427	3.427	tr|Q2KIT8|Q2KIT8_BOVIN	Tissue specific transplantation antigen P35B OS=Bos taurus GN=TSTA3 PE=2 SV=1	BOVIN	1	1.31328	0.230371	1.27057	0.503168	1.29193	1.87172	0.367879	1.07365	0.80934	1.1272	0.753952	0.801678	0.584018	1.00084	0.896198	0.6376	0.799451	0.504819	0.975452	0.853911	0.912011	0.885092	0.943732	0.243198	0.882497
Uni_Bias2	604	362	3.01	3.01	14.18	8.955	8.955	tr|F1MHV5|F1MHV5_BOVIN	Uncharacterized protein OS=Bos taurus GN=MAPRE1 PE=4 SV=1	BOVIN	2	0.969104	0.744466	0.963829	0.851036	0.966466	0.396414	0.7985	1.01019	0.939576	1.01859	0.784681	0.972747	0.913476	1.00051	0.343355	0.8395	0.959324	0.708297	0.918961	0.413851	0.912011	0.726549	0.915486	1.04378	0.535261
NCBI_Bias2	363	340	3.12	3.12	14.18	11.19	8.955	gi|81170676	RecName: Full=Microtubule-associated protein RP/EB family member 1; AltName: Full=APC-binding protein EB1; AltName: Full=End-binding protein 1; Short=EB1	BOVIN	2	0.972747	0.903989	0.963829	0.863692	0.968288	0.214955	0.882497	1.00925	0.828658	1.02802	0.777097	0.963829	0.927426	1.00037	0.44774	0.7985	0.946237	0.994959	0.903649	0.734475	0.912011	0.718395	0.90783	0.55532	0.6989
Uni_Bias2	632	1	148.45	148.45	80.79	77.64	71.8	tr|F1MNN6|F1MNN6_BOVIN	Uncharacterized protein OS=Bos taurus GN=MVP PE=4 SV=1	BOVIN	255			0.990832	0.245362	0.990832	1.22039	0.535261			1	0.93477	1	0.140864	1	1.76099	0.367879					0.990832	0.584961	0.990832	0.465746	0.778801
Uni_Bias2	637	31	29.86	29.86	60.56	53.06	51.67	tr|F1MP41|F1MP41_BOVIN	Uncharacterized protein (Fragment) OS=Bos taurus GN=ASTL PE=4 SV=1	BOVIN	36			1	0.96521	1	0.0307562	0.9851			1	0.869222	1	0.848934	1	0.263991	0.882497					1	0.954414	1	0.0405261	0.9802
Uni_Bias2	699	275	4.89	4.89	14.25	4.75	4.75	tr|F1MWU0|F1MWU0_BOVIN	Uncharacterized protein (Fragment) OS=Bos taurus GN=TMEM43 PE=4 SV=1	BOVIN	3	1.02198	0.862808	0.981748	0.338437	1.00186	1.06922	0.535261	1.05315	0.704337	0.972747	0.657533	0.972747	0.211018	0.999548	2.01997	0.324652	1.00724	0.953972	0.975079	0.841981	0.981748	0.962631	0.978413	0.182476	0.9048
Uni_Bias2	492	225	6.3	6.3	22.22	19.91	16.67	tr|B0JYN2|B0JYN2_BOVIN	RAN, member RAS oncogene family OS=Bos taurus GN=RAN PE=2 SV=1	BOVIN	4	0.97663	0.728077	0.981748	0.950555	0.979189	0.31969	0.8395	0.960187	0.558861	1.01859	0.831489	1.01859	0.857255	0.999123	0.79946	0.6703	0.963765	0.735134	0.978049	0.746606	0.981748	0.924193	0.979898	0.322292	0.8395
Uni_Bias2	662	340	3.62	3.66	21.84	11.11	8.812	tr|F1MTK0|F1MTK0_BOVIN	Uncharacterized protein (Fragment) OS=Bos taurus GN=DNAJC9 PE=4 SV=1	BOVIN	3	0.963205	0.59445	0.954993	0.770776	0.959099	0.677912	0.6989	0.939508	0.390604	0.990832	0.983496	1.0666	0.600194	0.998979	1.2744	0.472367	1.01396	0.841893	1.03626	0.657133	1.02802	0.794394	1.03214	0.564622	0.6989
Uni_Bias2	240	393	2.35	2.35	12.87	7.261	3.63	sp|Q2KJH4|WDR1_BOVIN	WD repeat-containing protein 1 OS=Bos taurus GN=WDR1 PE=2 SV=3	BOVIN	1	1.00686	0.946528	0.963829	0.64862	0.985344	0.423752	0.7985	1.02296	0.824532	1.00925	0.880521	0.963829	0.529937	0.99868	0.829657	0.6376	1.00186	0.985503	0.98369	0.872259	0.92045	0.283123	0.95207	1.21476	0.535261
Uni_Bias2	164	301	4.25	5.79	19.38	19.38	10.85	sp|P81623|ERP29_BOVIN	Endoplasmic reticulum resident protein 29 OS=Bos taurus GN=ERP29 PE=1 SV=2	BOVIN	3	1.09324	0.408247	0.990832	0.953541	1.04204	0.819475	0.6376	1.04808	0.803649	0.990832	0.795087	0.954993	0.88378	0.997969	0.49635	0.778801	0.896546	0.327557	0.934068	0.502856	0.946237	0.729628	0.940153	0.87091	0.6376
Uni_Bias2	702	512	1.68	1.68	13.2	4.33	2.062	tr|F1MX45|F1MX45_BOVIN	Uncharacterized protein (Fragment) OS=Bos taurus GN=DNPEP PE=4 SV=1	BOVIN	1	0.977635	0.859534	0.937562	0.808319	0.957598	0.316308	0.8395	1.03808	0.924684	0.954993	0.796933	1	0.965346	0.997692	0.295805	0.882497	0.92097	0.564532	0.867995	0.736177	0.981748	0.952843	0.924872	0.307993	0.8395
NCBI_Bias2	57	238	5.5	5.52	21.25	20	10.75	gi|296475785	poly(A) binding protein interacting protein 1 [Bos taurus]	Bos taurus	2	0.946237	0.54504	0.954993	0.594272	0.950615	0.979172	0.606531	0.963829	0.723285	0.981748	0.873871	1.04713	0.325758	0.997569	1.3727	0.472367	1.01859	0.647817	1	0.842084	1.01859	0.579925	1.0093	0.622546	0.6989
NCBI_Bias2	255	129	11.61	11.64	39.17	25.59	15.75	gi|731049	RecName: Full=UTP--glucose-1-phosphate uridylyltransferase; AltName: Full=UDP-glucose pyrophosphorylase; Short=UDPGP; Short=UGPase	BOVIN	6	0.946237	0.549932	0.937562	0.496523	0.9419	1.1275	0.535261	0.954993	0.444756	1.00925	0.972789	1.02802	0.85727	0.997421	0.861483	0.6376	0.981748	0.652101	0.972747	0.778756	0.963829	0.637364	0.968288	0.608421	0.6989
NCBI_Bias2	265	66	19.69	25.74	71.37	69.02	62.35	gi|73586683	Tyrosine 3-monooxygenase/tryptophan 5-monooxygenase activation protein, epsilon polypeptide [Bos taurus]	Bos taurus	24	1.01859	0.857754	1.03753	0.599249	1.02806	0.57806	0.6989	1	0.971238	1.00925	0.789067	0.981748	0.945476	0.997	0.279819	0.882497	0.963829	0.835326	0.981748	0.99426	1.01859	0.638506	1.00017	0.394669	0.7985
Uni_Bias2	543	324	4.01	4.08	21.71	12.5	12.5	tr|E1BHR2|E1BHR2_BOVIN	Ubiquitin carrier protein OS=Bos taurus PE=3 SV=1	BOVIN	2	0.866757		0.862979	0.231667	0.864868	1.27027	0.472367	1.04223		0.972747	0.831935	0.972747	0.721052	0.995908	0.443888	0.7985	1.13838		0.944416		0.870964	0.310267	0.90769	1.01653	0.535261
Uni_Bias2	336	359	3.03	3.03	27.2	11.11	8.812	sp|Q3ZBW4|PCNA_BOVIN	Proliferating cell nuclear antigen OS=Bos taurus GN=PCNA PE=2 SV=1	BOVIN	2	1.03684	0.751575	1.02802	0.707095	1.03243	0.5491	0.7596	0.985499	0.919303	1.02802	0.630134	0.972747	0.80378	0.995421	0.663942	0.6989	0.913676	0.730021	0.9619	0.93093	0.972747	0.719824	0.967324	0.347714	0.8395
Uni_Bias2	330	60	21.06	21.06	37.94	31.21	27.48	sp|Q3ZBH0|TCPB_BOVIN	T-complex protein 1 subunit beta OS=Bos taurus GN=CCT2 PE=1 SV=3	BOVIN	11	0.964011	0.575318	0.981748	0.89937	0.972879	0.572307	0.6989	0.957616	0.363701	1.00925	0.799013	1.01859	0.597235	0.995153	1.52111	0.416862	1.00685	0.898368	1.01096	0.815824	0.990832	0.880297	1.0009	0.287549	0.8395
Uni_Bias2	582	200	7.14	7.14	27.14	12.44	11.31	tr|F1MCZ4|F1MCZ4_BOVIN	Uncharacterized protein OS=Bos taurus GN=ATP6V1A PE=4 SV=1	BOVIN	5	0.932255	0.272232	0.903649	0.41867	0.917952	1.88638	0.367879	0.966246	0.647537	1	0.95854	1.01859	0.790091	0.994946	0.618896	0.6989	0.963719	0.630089	0.927324	0.229286	0.928966	0.543385	0.928145	1.80903	0.367879
Uni_Bias2	642	288	4.54	4.8	17.2	7.477	6.355	tr|F1MPD2|F1MPD2_BOVIN	Uncharacterized protein (Fragment) OS=Bos taurus GN=KPNA7 PE=4 SV=1	BOVIN	3	0.992368	0.861982	0.972747	0.791102	0.982558	0.332538	0.8395	0.896121	0.027352	0.981748	0.932151	1.10662	0.36309	0.994831	4.06702	0.119433	0.863561	0.00600542	0.953601	0.295983	1.08643	0.521772	1.02001	1.6225	0.416862
Uni_Bias2	808	368	2.91	2.91	25.95	14.59	14.59	tr|Q2NKU1|Q2NKU1_BOVIN	Deoxyuridine triphosphatase OS=Bos taurus GN=DUT PE=2 SV=1	BOVIN	2	1.04004	0.780485	1.00925	0.981758	1.02465	0.231262	0.882497	0.955357	0.738862	0.981748	0.936136	1.04713	0.957332	0.994744	0.35807	0.7985	0.978151	0.92509	1.05637	0.900993	1.07647	0.912001	1.06642	0.170567	0.9048
NCBI_Bias2	415	72	18.98	19.14	36.58	31.17	24.03	gi|86827651	EEF1A1 protein [Bos taurus]	Bos taurus	13	1.03753	0.334138	1.02802	0.131794	1.03277	2.71236	0.25284	1.00925	0.825137	1.00925	0.442227	0.963829	0.219587	0.994112	2.19245	0.324652	0.946237	0.398265	0.981748	0.92601	0.981748	0.633983	0.981748	0.462613	0.778801
NCBI_Bias2	65	50	22.34	22.38	33.19	17.69	13.43	gi|296477394	DNA ligase (ATP) 1 [Bos taurus]	Bos taurus	11	1.01859	0.732281	1.00925	0.78892	1.01392	0.476578	0.778801	0.990832	0.797213	1.01859	0.783662	0.972747	0.237343	0.994057	1.65784	0.416862	0.937562	0.219787	0.963829	0.510026	0.963829	0.175143	0.963829	2.09803	0.324652
Uni_Bias2	826	314	4.06	4.06	13.39	6.485	6.485	tr|Q3MI02|Q3MI02_BOVIN	UQCRC1 protein (Fragment) OS=Bos taurus GN=UQCRC1 PE=2 SV=1	BOVIN	2	0.939021	0.654753	0.92045	0.790529	0.929735	0.57201	0.6989	0.921543	0.572757	0.963829	0.897577	1.09648	0.714003	0.99395	0.870516	0.6376	1.0345	0.800154	1.05172	0.72642	1.05682	0.812724	1.05427	0.457739	0.778801
Uni_Bias2	126	29	30.22	30.22	40.93	37.83	36.5	sp|P49410|EFTU_BOVIN	Elongation factor Tu, mitochondrial OS=Bos taurus GN=TUFM PE=1 SV=1	BOVIN	18	1.01656	0.809429	1.04713	0.456024	1.03185	0.865667	0.6376	0.988971	0.797937	1.03753	0.477141	0.954993	0.693792	0.993831	1.15631	0.535261	0.97542	0.678992	0.999594	0.992523	0.972747	0.78777	0.986171	0.21372	0.882497
Uni_Bias2	746	430	2.03	2.08	10.29	2.286	2.286	tr|F1N4N4|F1N4N4_BOVIN	Uncharacterized protein OS=Bos taurus GN=DYNC1LI1 PE=4 SV=1	BOVIN	1	0.837269	0.348289	0.879023	0.637714	0.858146	1.30687	0.472367	0.856721	0.388001	0.954993	0.810783	1.1695	0.637914	0.993738	1.395	0.472367	1.11717	0.49186	1.08917	0.573428	1.0666	0.81104	1.07788	0.664957	0.6989
Uni_Bias2	430	305	4.14	4.15	11.76	8.951	6.905	tr|A3KN51|A3KN51_BOVIN	TSG101 protein OS=Bos taurus GN=TSG101 PE=2 SV=1	BOVIN	2	1.06245	0.809217	1.0666	0.541614	1.06452	0.71649	0.687289	0.985705	0.948848	0.937562	0.781643	1.05682	0.689155	0.993361	0.582957	0.6989	1.16641	0.369797	1.25481	0.261421	1.20226	0.270495	1.22854	2.301	0.25284
Uni_Bias2	24	447	2.01	2.01	13.86	2.228	2.228	sp|A7MAZ3|UBA5_BOVIN	Ubiquitin-like modifier-activating enzyme 5 OS=Bos taurus GN=UBA5 PE=2 SV=1	BOVIN	1	0.906121		0.887156	0.821301	0.896639	0.170995	0.9048	0.969517		1.01859	0.955137	0.990832	0.993746	0.99298	0.0453176	0.9782	0.931741		0.868696		0.862979	0.78619	0.865837	0.208945	0.882497
Uni_Bias2	710	115	13.04	13.04	66.67	38.81	38.81	tr|F1MYU3|F1MYU3_BOVIN	Uncharacterized protein (Fragment) OS=Bos taurus PE=4 SV=1	BOVIN	7	0.957802	0.466901	0.937562	0.905863	0.947682	0.747425	0.687289	1.14568	0.141581	0.903649	0.854765	0.928966	0.889075	0.992765	1.93642	0.367879	1.12323	0.100153	0.93726	0.289796	0.954993	0.941087	0.946126	1.12856	0.535261
Uni_Bias2	614	274	4.93	4.94	37.26	10.85	10.85	tr|F1MJB1|F1MJB1_BOVIN	Uncharacterized protein OS=Bos taurus GN=DTYMK PE=4 SV=1	BOVIN	3	0.9427	0.678983	0.928966	0.745594	0.935833	0.591278	0.6989	0.95805	0.756165	0.981748	0.903061	1.03753	0.75911	0.992442	0.570723	0.6989	0.996015	0.976225	0.977589	0.866301	0.981748	0.887696	0.979668	0.228133	0.882497
Uni_Bias2	314	355	3.12	3.15	11.08	6.897	6.897	sp|Q3T0L2|ERP44_BOVIN	Endoplasmic reticulum resident protein 44 OS=Bos taurus GN=ERP44 PE=2 SV=1	BOVIN	2	1.06788	0.569902	1.04713	0.746638	1.0575	0.742179	0.687289	0.985607	0.908263	1.01859	0.848381	0.972747	0.892136	0.992315	0.325533	0.8395	0.903416	0.463133	0.976099	0.888717	0.990832	0.999981	0.983466	0.102489	0.9277
NCBI_Bias2	449	178	7.94	7.94	24.79	18.6	12.81	gi|94966921	oxidoreductase HTATIP2 [Bos taurus]	Bos taurus	4	0.963829	0.506985	0.937562	0.540375	0.950696	1.12462	0.535261	0.937562	0.380568	0.972747	0.793311	1.0666	0.461866	0.992302	1.71122	0.416862	1.00925	0.713307	1.03753	0.552789	1.02802	0.69455	1.03277	0.831475	0.6376
Uni_Bias2	427	95	15.48	15.48	26.6	18.06	13.46	tr|A3KN04|A3KN04_BOVIN	RPN1 protein OS=Bos taurus GN=RPN1 PE=2 SV=1	BOVIN	7	0.939394	0.417941	0.954993	0.977523	0.947193	0.777516	0.6703	1.01062	0.846739	0.946237	0.657406	1.01859	0.988869	0.991818	0.518556	0.7596	1.1183	0.0775981	1.03683	0.513751	1.02802	0.277219	1.03242	1.69285	0.416862
Uni_Bias2	598	167	8.86	9.09	24.86	11.68	10.73	tr|F1MGX0|F1MGX0_BOVIN	Uncharacterized protein OS=Bos taurus GN=CCT6A PE=4 SV=1	BOVIN	5	0.97031	0.555321	1	0.707537	0.985155	0.811414	0.6376	0.98419	0.787052	1	0.87419	0.990832	0.99424	0.991674	0.3298	0.8395	1.02917	0.647609	1.0132	0.797286	1	0.84636	1.0066	0.341661	0.8395
Uni_Bias2	308	371	2.87	2.87	15.15	12.63	5.556	sp|Q3T0D7|SAR1A_BOVIN	GTP-binding protein SAR1a OS=Bos taurus GN=SAR1A PE=2 SV=1	BOVIN	1	1.05133	0.555774	1.01859	0.770134	1.03496	0.737071	0.687289	1.00142	0.986182	1.01859	0.796881	0.954993	0.661197	0.991668	0.568637	0.6989	0.899695	0.256718	0.942277	0.488534	0.954993	0.685888	0.948635	0.949703	0.606531
Uni_Bias2	264	392	2.36	2.4	14.2	3.977	2.462	sp|Q32KS0|TBCE_BOVIN	Tubulin-specific chaperone E OS=Bos taurus GN=TBCE PE=2 SV=1	BOVIN	1	1.0965	0.408986	1.02802	0.872987	1.06226	0.894568	0.6376	0.992655	0.955241	0.981748	0.960523	1	0.989042	0.991468	0.0843291	0.956	0.973622	0.794046	1.07305	0.513899	1.04713	0.824262	1.06009	0.746115	0.687289
Uni_Bias2	607	69	19.39	19.39	43.39	34.48	31.03	tr|F1MIL2|F1MIL2_BOVIN	Uncharacterized protein (Fragment) OS=Bos taurus GN=TLE6 PE=4 SV=1	BOVIN	18	1.02516	0.826033	0.990832	0.703524	1.00799	0.471447	0.778801	0.992591	0.897508	0.981748	0.802655	1	0.907222	0.991446	0.369438	0.7985	0.970273	0.787106	0.998996	0.985266	1.01859	0.557433	1.00879	0.520507	0.7596
Uni_Bias2	621	88	16.61	16.61	46.06	32.46	19.09	tr|F1MLK0|F1MLK0_BOVIN	Uncharacterized protein (Fragment) OS=Bos taurus GN=IDH1 PE=4 SV=1	BOVIN	8	0.965553	0.537741	0.946237	0.355173	0.955895	1.43797	0.472367	0.964708	0.802362	0.990832	0.851958	1.01859	0.709655	0.991377	0.628328	0.6989	0.988416	0.816203	0.988661	0.931096	0.972747	0.752254	0.980704	0.309281	0.8395
Uni_Bias2	609	106	14.42	14.42	36.58	34.9	29.19	tr|F1MIN1|F1MIN1_BOVIN	Uncharacterized protein (Fragment) OS=Bos taurus GN=VDAC1 PE=4 SV=1	BOVIN	8	0.935011	0.698058	1.01859	0.775675	0.976801	0.532857	0.7596	0.963512	0.72734	1.03753	0.998995	0.972747	0.740452	0.991262	0.538404	0.7596	1.05379	0.749679	1.02004	0.835977	0.954993	0.961067	0.987514	0.190104	0.9048
NCBI_Bias2	223	273	4.57	4.57	34.22	21.33	16.44	gi|329664192	putative octanoyltransferase, mitochondrial [Bos taurus]	Bos taurus	2	0.954993	0.979365	0.981748	0.930633	0.96837	0.0805532	0.956	1	0.987236	1.01859	0.986163	0.954993	0.693762	0.991195	0.34084	0.8395	0.963829	0.748349	0.92045	0.720433	0.928966	0.762829	0.924708	0.519958	0.7596
Uni_Bias2	96	119	12.41	12.62	21.15	12.44	10.64	sp|P20004|ACON_BOVIN	Aconitate hydratase, mitochondrial OS=Bos taurus GN=ACO2 PE=1 SV=4	BOVIN	8	0.885262	0.142694	0.92045	0.123519	0.902856	3.50772	0.153355	0.923684	0.217359	0.972747	0.745758	1.07647	0.117402	0.990966	3.4411	0.173774	1.08658	0.34863	1.03866	0.502465	1.00925	0.721637	1.02396	0.88115	0.6376
NCBI_Bias2	93	115	13.31	46.4	63.84	50.79	45.75	gi|296482938	heat shock-related 70 kDa protein 2 [Bos taurus]	Bos taurus	49	0.963829	0.723816	0.981748	0.597396	0.972788	0.728219	0.687289	1	0.811995	1	0.646254	0.972747	0.674329	0.990916	0.902344	0.606531	0.990832	0.964182	0.954993	0.588013	0.954993	0.571148	0.954993	0.947729	0.606531
Uni_Bias2	395	15	40.71	40.71	34.43	23.59	19.49	sp|Q647I9|NALP5_BOVIN	NACHT, LRR and PYD domains-containing protein 5 OS=Bos taurus GN=NLRP5 PE=2 SV=1	BOVIN	21	1.15125	0.000290072	1.00925	0.520136	1.08025	7.64275	0.020754	1.04356	0.204923	0.972747	0.459708	0.954993	0.209484	0.990432	3.40955	0.173774	0.860689	0.00154265	0.946838	0.23712	1	0.749852	0.973419	1.50011	0.416862
Uni_Bias2	360	211	6.86	6.86	38.15	22.09	16.06	sp|Q5E956|TPIS_BOVIN	Triosephosphate isomerase OS=Bos taurus GN=TPI1 PE=2 SV=3	BOVIN	4	0.96485	0.659855	0.912011	0.871961	0.93843	0.48011	0.778801	0.926984	0.382847	0.895365	0.832725	1.14815	0.69108	0.990168	1.31389	0.472367	1.04317	0.605961	1.0833	0.360814	1.1695	0.656005	1.1264	1.25162	0.472367
Uni_Bias2	574	122	12.19	12.19	28.57	23.91	20.41	tr|F1MB84|F1MB84_BOVIN	Uncharacterized protein (Fragment) OS=Bos taurus GN=GRHPR PE=4 SV=1	BOVIN	7	1.02175	0.714587	0.981748	0.931733	1.00175	0.353308	0.7985	1.02347	0.736565	0.981748	0.872076	0.963829	0.598548	0.989683	0.830271	0.6376	0.956619	0.461625	0.952611	0.427581	0.954993	0.560738	0.953802	1.24044	0.535261
NCBI_Bias2	19	279	4.46	4.46	18.07	8.193	5.783	gi|296470527	pyruvate dehydrogenase kinase 3 [Bos taurus]	Bos taurus	2	1.03753	0.749306	1.04713	0.774757	1.04233	0.47235	0.778801	0.981748	0.952866	1.0666	0.700293	0.92045	0.715844	0.989598	0.641741	0.6989	0.862979	0.391402	0.912011	0.599866	0.903649	0.645323	0.90783	0.824336	0.6376
Uni_Bias2	464	326	4	4.02	11.7	9.434	9.434	tr|A6QLZ0|A6QLZ0_BOVIN	LGALS3 protein OS=Bos taurus GN=LGALS3 PE=2 SV=1	BOVIN	2	0.948757	0.689016	0.946237	0.761171	0.947497	0.560578	0.6989	0.974314	0.836258	1.02802	0.828102	0.963829	0.845049	0.98872	0.465388	0.778801	0.846763	0.382542	0.822341	0.397516	0.887156	0.526891	0.854749	1.35785	0.472367
NCBI_Bias2	129	198	7.11	7.11	36.64	31.68	20.99	gi|296489983	aldo-keto reductase family 7, member A2 [Bos taurus]	Bos taurus	4	0.972747	0.93014	0.972747	0.931663	0.972747	0.124385	0.9277	0.954993	0.881286	1.01859	0.898494	0.990832	0.997671	0.988139	0.204761	0.9048	0.928966	0.81416	0.946237	0.860918	0.946237	0.835141	0.946237	0.286556	0.8395
NCBI_Bias2	291	55	21.43	23.41	55.78	40.2	37.69	gi|74353992	PRDX2 protein [Bos taurus]	Bos taurus	23	1.10662	0.821981	1	0.507397	1.05331	0.759581	0.6703	0.972747	0.39658	1.00925	0.139737	0.981748	0.35012	0.987916	3.42428	0.173774	0.816582	0.399934	0.928966	0.826905	0.972747	0.950689	0.950857	0.209011	0.882497
NCBI_Bias2	109	265	4.79	5.11	12.65	8.094	3.879	gi|296486229	calnexin [Bos taurus]	Bos taurus	2	1.01859	0.749754	1.02802	0.5526	1.0233	0.76534	0.6703	0.990832	0.987244	0.972747	0.686204	1	0.609808	0.98786	0.767859	0.6703	1.02802	0.709814	1.0666	0.489809	1.05682	0.585259	1.06171	1.08525	0.535261
Uni_Bias2	260	147	10.19	10.23	44.31	37.25	24.31	sp|Q2TBV3|ETFB_BOVIN	Electron transfer flavoprotein subunit beta OS=Bos taurus GN=ETFB PE=2 SV=3	BOVIN	5	1.08865	0.416235	1.02802	0.629106	1.05833	1.16387	0.535261	0.962545	0.57393	1	0.837762	1	0.837678	0.987515	0.789886	0.6703	0.929586	0.295064	1.04847	0.487827	1.02802	0.629032	1.03824	1.02612	0.535261
Uni_Bias2	770	316	4.05	4.05	9.771	7.328	5.038	tr|Q08E58|Q08E58_BOVIN	Tubulin tyrosine ligase-like family, member 12 OS=Bos taurus GN=TTLL12 PE=2 SV=1	BOVIN	2	1.13277	0.55101	1.08643	0.640713	1.1096	0.904354	0.606531	0.992393	0.939049	1.05682	0.676287	0.912011	0.675478	0.987074	0.73514	0.687289	0.834986	0.531019	0.948992	0.616134	0.937562	0.712448	0.943277	0.715144	0.6989
Uni_Bias2	472	206	7	7	27.37	20.33	14.91	tr|A6QPH7|A6QPH7_BOVIN	AKR7A2 protein OS=Bos taurus GN=AKR7A2 PE=2 SV=1	BOVIN	4	0.96265	0.86881	0.972747	0.928434	0.967699	0.186648	0.9048	0.948984	0.723561	1.01859	0.892335	0.990832	0.986005	0.986136	0.392235	0.7985	0.946033	0.688771	0.956794	0.743782	0.946237	0.837077	0.951515	0.411578	0.7985
Uni_Bias2	782	116	12.73	12.74	38.25	27.05	25.41	tr|Q148J8|Q148J8_BOVIN	Isocitrate dehydrogenase 3 (NAD+) alpha OS=Bos taurus GN=IDH3A PE=2 SV=1	BOVIN	8	0.979652	0.820282	0.972747	0.730532	0.9762	0.444796	0.7985	0.947691	0.426723	0.972747	0.983979	1.03753	0.478131	0.985989	1.39464	0.472367	1.00773	0.93201	1.03924	0.562427	1.02802	0.689847	1.03363	0.822362	0.6376
NCBI_Bias2	45	97	14.94	14.94	25.94	16.26	13.46	gi|296474621	dolichyl-diphosphooligosaccharide--protein glycosyltransferase subunit 1 [Bos taurus]	Bos taurus	7	0.981748	0.896866	0.972747	0.87455	0.977248	0.210975	0.882497	1.02802	0.609742	0.937562	0.754903	0.990832	0.921244	0.98547	0.745177	0.687289	1.0666	0.282414	1.02802	0.630144	1.02802	0.352525	1.02802	1.30674	0.472367
NCBI_Bias2	319	159	8.89	8.89	22.65	12.46	11.33	gi|75775489	ATPase, H+ transporting, lysosomal 70kDa, V1 subunit A [Bos taurus]	Bos taurus	5	0.92045	0.483929	0.903649	0.503381	0.91205	1.22664	0.535261	0.954993	0.749319	0.963829	0.861416	1.03753	0.724712	0.98545	0.65991	0.6989	0.972747	0.825913	0.928966	0.545189	0.972747	0.872893	0.950857	0.644983	0.6989
Uni_Bias2	136	499	1.89	2.03	18.72	7.143	7.143	sp|P62194|PRS8_BOVIN	26S protease regulatory subunit 8 OS=Bos taurus GN=PSMC5 PE=2 SV=1	BOVIN	2	0.981129	0.84878	0.903649	0.570175	0.942389	0.630393	0.6989	0.99181	0.93385	0.954993	0.820207	1.00925	0.886319	0.985352	0.33642	0.8395	0.911165	0.403868	0.899171	0.440856	0.954993	0.797061	0.927082	0.908423	0.606531
NCBI_Bias2	99	309	4	4.02	11.7	9.434	9.434	gi|296483121	galectin 3 [Bos taurus]	Bos taurus	2	0.963829	0.851671	0.946237	0.778418	0.955033	0.357031	0.7985	0.972747	0.902984	1.02802	0.819868	0.954993	0.818921	0.985252	0.434667	0.7985	0.895365	0.528506	0.887156	0.500653	0.887156	0.517678	0.887156	1.17281	0.535261
NCBI_Bias2	457	137	10.53	10.68	10.33	6.149	3.821	gi|969024	clathrin heavy chain [Bos taurus]	Bos taurus	4	1.09648	0.486598	1.09648	0.311974	1.09648	1.63742	0.416862	1.07647	0.566781	1	0.687137	0.879023	0.312448	0.985163	1.82953	0.367879	0.928966	0.819788	0.946237	0.924345	0.954993	0.849098	0.950615	0.210416	0.882497
NCBI_Bias2	289	95	14.95	20.23	41.62	34.73	28.74	gi|74353944	Lactate dehydrogenase B [Bos taurus]	Bos taurus	11	0.990832	0.885858	0.954993	0.896072	0.972912	0.200586	0.882497	0.972747	0.905188	0.963829	0.945152	1.01859	0.815587	0.985056	0.312579	0.8395	0.981748	0.995604	1	0.984853	1.01859	0.972673	1.0093	0.0373228	0.9802
NCBI_Bias2	87	52	21.8	22.15	34.24	26.61	23.73	gi|296482396	protein disulfide isomerase family A, member 6 [Bos taurus]	Bos taurus	15	1.00925	0.587861	1.00925	0.280105	1.00925	1.56681	0.416862	0.981748	0.951671	1	0.824166	0.972747	0.218448	0.984832	1.5323	0.416862	0.954993	0.429969	0.981748	0.752075	0.981748	0.699088	0.981748	0.558414	0.6989
Uni_Bias2	17	52	21.9	21.9	40.05	29.59	28.06	sp|A6H768|GALK1_BOVIN	Galactokinase OS=Bos taurus GN=GALK1 PE=2 SV=2	BOVIN	15	0.955421	0.65933	0.972747	0.969187	0.964084	0.388979	0.7985	0.980203	0.842738	1	0.848095	0.972747	0.474993	0.984317	0.938352	0.606531	0.974393	0.807703	0.946785	0.568721	0.946237	0.296024	0.946511	1.54755	0.416862
Uni_Bias2	733	289	4.5	4.5	51.35	27.7	18.24	tr|F1N1S0|F1N1S0_BOVIN	Uncharacterized protein OS=Bos taurus GN=SSBP1 PE=4 SV=1	BOVIN	2	1.01206	0.881171	0.981748	0.934688	0.996904	0.168546	0.9048	0.968922	0.697246	0.990832	0.98501	0.990832	0.963911	0.983529	0.358273	0.7985	0.979977	0.825715	1.02103	0.796446	0.990832	0.903439	1.00593	0.28589	0.8395
Uni_Bias2	325	174	8.38	8.38	31.25	23.53	20.96	sp|Q3T165|PHB_BOVIN	Prohibitin OS=Bos taurus GN=PHB PE=2 SV=1	BOVIN	5	1.05001	0.56062	1.07647	0.810393	1.06324	0.685271	0.6989	1.00364	0.963032	1.00925	0.941983	0.937562	0.999517	0.983485	0.085052	0.956	0.963414	0.669852	1.00517	0.952289	1	0.867078	1.00259	0.166346	0.9048
Uni_Bias2	740	497	1.91	1.91	10.48	8.254	8.254	tr|F1N3H1|F1N3H1_BOVIN	Uncharacterized protein OS=Bos taurus GN=CALU PE=4 SV=1	BOVIN	2	0.987722	0.93792	0.954993	0.988458	0.971357	0.0657515	0.9656	0.927152	0.694505	0.954993	0.964793	1.0666	0.930033	0.982913	0.410784	0.7985	0.98559	0.908943	1.04767	0.724191	1.0666	0.953532	1.05713	0.321623	0.8395
NCBI_Bias2	281	135	10.85	10.85	23.33	12.71	8.126	gi|74268185	HADHA protein [Bos taurus]	Bos taurus	6	1.03753	0.289589	1.03753	0.366472	1.03753	1.94835	0.367879	0.990832	0.832895	1.00925	0.347526	0.946237	0.345106	0.982107	2.00094	0.324652	0.937562	0.149523	0.981748	0.509809	0.972747	0.326975	0.977248	1.55616	0.416862
Uni_Bias2	253	89	16.54	20.99	32.72	18.78	13.8	sp|Q2TBI4|TRAP1_BOVIN	Heat shock protein 75 kDa, mitochondrial OS=Bos taurus GN=TRAP1 PE=2 SV=1	BOVIN	13	0.974959	0.660453	0.972747	0.367489	0.973853	1.22983	0.535261	0.991322	0.879034	0.972747	0.430882	0.981748	0.862279	0.981939	0.971977	0.606531	0.981828	0.749762	0.962918	0.516917	0.981748	0.938552	0.972333	0.628241	0.6989
Uni_Bias2	482	419	2.07	2.27	19.28	1.536	1.075	tr|A7MB48|A7MB48_BOVIN	KTN1 protein OS=Bos taurus GN=KTN1 PE=2 SV=1	BOVIN	1	0.955682		0.990832	0.994943	0.973257	0.00440363	0.99	0.878201		0.990832	0.997001	1.07647	0.825647	0.981833	0.16902	0.9277	1.04227		1.13146		1.0666	0.833138	1.09903	0.158566	0.9048
Uni_Bias2	749	109	14.16	14.16	28.28	17.93	15.92	tr|F1N690|F1N690_BOVIN	Uncharacterized protein OS=Bos taurus GN=DLAT PE=4 SV=1	BOVIN	8	1.0059	0.914113	1	0.756848	1.00295	0.319982	0.8395	0.980575	0.70553	0.981748	0.833179	0.981748	0.970728	0.981357	0.487298	0.778801	0.964001	0.652604	0.986206	0.787718	1	0.630409	0.993103	0.608014	0.6989
Uni_Bias2	285	411	2.09	2.11	14.87	3.077	3.077	sp|Q3SYS6|CHP1_BOVIN	Calcium-binding protein p22 OS=Bos taurus GN=CHP PE=2 SV=1	BOVIN	1	0.872351	0.404046	0.847227	0.733733	0.859789	1.05606	0.535261	0.823623	0.533215	0.870964	0.768331	1.24738	0.629215	0.980657	1.1775	0.535261	1.15289	0.53308	1.22198	0.292485	1.21339	0.658288	1.21768	1.43096	0.472367
Uni_Bias2	180	186	7.72	7.97	27.68	21.24	16.23	sp|Q0P5L8|KBL_BOVIN	2-amino-3-ketobutyrate coenzyme A ligase, mitochondrial OS=Bos taurus GN=GCAT PE=1 SV=1	BOVIN	4	1.02248	0.853778	1	0.942046	1.01124	0.189166	0.9048	0.950851	0.566063	1	0.936954	0.990832	0.9901	0.980561	0.559477	0.6989	0.905689	0.538283	0.971099	0.778383	0.990832	0.995215	0.980965	0.221779	0.882497
NCBI_Bias2	27	338	3.13	3.25	14.67	10.33	3.667	gi|296472248	geranylgeranyl pyrophosphate synthetase [Bos taurus]	Bos taurus	1	0.963829	0.800932	0.954993	0.735463	0.959411	0.459687	0.778801	0.92045	0.532079	0.981748	0.908518	1.03753	0.675447	0.979909	0.972198	0.606531	0.972747	0.881587	1.01859	0.81135	1.00925	0.843253	1.01392	0.329668	0.8395
NCBI_Bias2	359	380	2.35	2.35	11.22	6.803	4.422	gi|78369456	nucleophosmin [Bos taurus]	Bos taurus	1	0.954993	0.798563	0.954993	0.728963	0.954993	0.46997	0.778801	0.928966	0.699432	0.990832	0.970862	1.01859	0.818274	0.979463	0.510398	0.7596	0.972747	0.894863	0.990832	0.996234	0.981748	0.932532	0.98629	0.0639497	0.9704
Uni_Bias2	832	165	8.99	8.99	34.3	18.6	12.81	tr|Q3SX02|Q3SX02_BOVIN	HIV-1 Tat interactive protein 2, 30kDa OS=Bos taurus GN=HTATIP2 PE=2 SV=1	BOVIN	4	0.939312	0.36563	0.937562	0.0907813	0.938437	2.95792	0.22313	0.9256	0.275527	0.954993	0.245278	1.05682	0.25808	0.979137	3.51684	0.153355	1.03213	0.658627	1.04476	0.520889	1.02802	0.29492	1.03639	1.6271	0.416862
Uni_Bias2	859	33	28.87	28.87	44.96	36.11	29.2	tr|Q3ZC87|Q3ZC87_BOVIN	Pyruvate kinase (Fragment) OS=Bos taurus GN=PKM2 PE=2 SV=1	BOVIN	15	1.01306	0.79424	0.990832	0.876887	1.00195	0.314209	0.8395	0.964524	0.474658	0.990832	0.878261	0.981748	0.958601	0.979035	0.796714	0.6703	0.925496	0.145436	0.969526	0.53818	0.981748	0.718336	0.975637	0.82549	0.6376
Uni_Bias2	664	399	2.26	2.26	11.76	6.92	6.92	tr|F1MTV9|F1MTV9_BOVIN	Uncharacterized protein OS=Bos taurus GN=780990 PE=4 SV=1	BOVIN	2	0.916818	0.413108	0.946237	0.703687	0.931527	1.07311	0.535261	0.936612	0.522125	0.981748	0.957411	1.01859	0.789823	0.978984	0.807194	0.6376	1.02815	0.784283	1.0039	0.967735	0.981748	0.947433	0.992825	0.07539	0.9656
Uni_Bias2	46	397	2.26	2.26	25.23	11.38	4.923	sp|P00125|CY1_BOVIN	Cytochrome c1, heme protein, mitochondrial OS=Bos taurus GN=CYC1 PE=1 SV=2	BOVIN	1	0.999327	0.995665	0.990832	0.920038	0.995079	0.0761618	0.9608	0.964331	0.775865	0.990832	0.999201	0.981748	0.665644	0.97897	0.574637	0.6989	0.966638	0.789683	0.999184	0.99475	0.981748	0.601729	0.990466	0.445771	0.7985
NCBI_Bias2	47	144	9.96	9.96	52.17	43.96	28.99	gi|296474622	ras-related protein Rab-7a [Bos taurus]	Bos taurus	5	0.972747	0.778636	0.981748	0.769667	0.977248	0.444725	0.7985	0.963829	0.808893	0.990832	0.913581	0.981748	0.664097	0.978803	0.61826	0.6989	0.963829	0.986114	0.972747	0.95439	0.972747	0.928341	0.972747	0.105133	0.9277
NCBI_Bias2	149	39	25.43	25.43	39.96	36.1	34.17	gi|297476850	PREDICTED: transducin-like enhancer of split 6-like [Bos taurus]	Bos taurus	26	1.00925	0.643114	1.02802	0.262315	1.01863	1.54578	0.416862	0.990832	0.889302	0.981748	0.320629	0.963829	0.287354	0.978803	2.17306	0.324652	0.972747	0.522091	0.990832	0.953573	1.00925	0.384918	1.00004	0.870554	0.6376
Uni_Bias2	844	296	4.29	4.29	14.25	10.31	8.553	tr|Q3SZN8|Q3SZN8_BOVIN	Ribonuclease/angiogenin inhibitor 1 OS=Bos taurus GN=RNH1 PE=2 SV=1	BOVIN	2	1.03265	0.872553	1	0.951763	1.01632	0.161359	0.9048	0.945419	0.620471	1	0.911185	0.990832	0.973778	0.97875	0.518423	0.7596	0.905732	0.617756	0.985163	0.922901	0.990832	0.999857	0.987997	0.0698139	0.9704
Uni_Bias2	122	380	2.65	2.65	26.85	16.67	10.19	sp|P48427|TBCA_BOVIN	Tubulin-specific chaperone A OS=Bos taurus GN=TBCA PE=1 SV=3	BOVIN	1	1.17791	0.345717	1.05682	0.802565	1.11736	1.1136	0.535261	0.959352	0.747095	1.03753	0.84794	0.937562	0.833051	0.978147	0.555175	0.6989	0.784463	0.246127	0.960812	0.755366	0.954993	0.879118	0.957902	0.355591	0.7985
Uni_Bias2	44	269	5.08	5.1	21.82	10.61	8.182	sp|O97764|QOR_BOVIN	Zeta-crystallin OS=Bos taurus GN=CRYZ PE=2 SV=2	BOVIN	3	0.983969	0.870624	0.972747	0.540117	0.978358	0.655362	0.6989	0.997379	0.98516	0.954993	0.841881	0.981748	0.809832	0.97804	0.345696	0.8395	0.977415	0.818031	0.962122	0.698729	0.990832	0.536188	0.976477	0.852748	0.6376
Uni_Bias2	131	364	2.97	3.14	17.67	12	3.667	sp|P56966|GGPPS_BOVIN	Geranylgeranyl pyrophosphate synthase OS=Bos taurus GN=GGPS1 PE=1 SV=2	BOVIN	1	0.933503	0.414787	0.954993	0.711382	0.944248	1.06014	0.535261	0.914636	0.310044	0.981748	0.898674	1.03753	0.646605	0.977971	1.48867	0.472367	0.993309	0.937422	1.01078	0.908614	1.00925	0.827076	1.01001	0.24815	0.882497
Uni_Bias2	376	217	6.6	7.02	48.48	45.45	20	sp|Q5E9D5|DEST_BOVIN	Destrin OS=Bos taurus GN=DSTN PE=2 SV=3	BOVIN	5	0.931727	0.38058	0.981748	0.583189	0.956738	1.30749	0.472367	0.933398	0.592974	1.01859	0.943055	0.981748	0.962356	0.977912	0.538184	0.7596	0.925286	0.314535	0.922227	0.295799	0.946237	0.510048	0.934232	1.64278	0.416862
NCBI_Bias2	343	511	1.46	1.46	10.48	8.254	8.254	gi|77736275	calumenin precursor [Bos taurus]	Bos taurus	2	0.981748	0.944885	0.963829	0.987309	0.972788	0.0603363	0.9656	0.912011	0.944015	0.954993	0.968355	1.0666	0.937626	0.977867	0.133913	0.9512	0.990832	0.926461	1.0666	0.962528	1.0666	0.956472	1.0666	0.0718288	0.9656
Uni_Bias2	128	436	2.02	2.05	7.828	3.327	2.153	sp|P53619|COPD_BOVIN	Coatomer subunit delta OS=Bos taurus GN=ARCN1 PE=1 SV=1	BOVIN	1	0.771007		0.751623	0.610845	0.761315	0.428138	0.7985	0.794416		0.831764	0.737035	1.30617	0.604825	0.97745	0.701765	0.6989	1.22795		1.18886		1.18032	0.729493	1.18459	0.273957	0.8395
NCBI_Bias2	347	230	5.88	5.89	19.93	18.45	15.13	gi|77736381	ubiquitin thioesterase OTUB1 [Bos taurus]	Bos taurus	3	0.937562	0.77381	0.937562	0.81563	0.937562	0.399745	0.7985	0.92045	0.549909	0.963829	0.867754	1.04713	0.792836	0.977136	0.844259	0.6376	0.981748	0.865689	1.00925	0.873558	1.01859	0.844444	1.01392	0.264275	0.8395
Uni_Bias2	466	55	21.63	21.85	39.51	34.66	30.91	tr|A6QNL5|A6QNL5_BOVIN	PDIA6 protein (Fragment) OS=Bos taurus GN=PDIA6 PE=2 SV=1	BOVIN	14	1.04708	0.292703	1.02802	0.616677	1.03755	1.48703	0.472367	0.985578	0.733774	0.990832	0.950446	0.954993	0.551962	0.977134	0.829203	0.6376	0.927209	0.0966324	0.982748	0.683955	0.981748	0.972773	0.982248	0.353922	0.7985
Uni_Bias2	147	161	9.23	10.18	48.64	31.97	27.21	sp|P68002|VDAC2_BOVIN	Voltage-dependent anion-selective channel protein 2 OS=Bos taurus GN=VDAC2 PE=2 SV=2	BOVIN	6	0.911728	0.176429	0.972747	0.835984	0.942238	1.66247	0.416862	0.958282	0.499376	1	0.826411	0.972747	0.957036	0.97701	0.806896	0.6376	1.03396	0.668178	0.981213	0.758722	0.946237	0.711786	0.963725	0.535136	0.7596
NCBI_Bias2	7	4	69.58	69.58	64.43	60.46	55.73	gi|152941210	heat shock 70kDa protein 5 [Bos taurus]	Bos taurus	70	0.654636	0.0665005	0.963829	0.175638	0.809233	3.86511	0.135335	0.92045	0.777084	0.981748	0.415395	1.02802	0.57135	0.976738	1.46834	0.472367	1.52757	0.0459862	1.07647	0.916054	1.00925	0.760637	1.04286	0.313802	0.8395
Uni_Bias2	580	309	4.11	4.11	30.83	19.17	15	tr|F1MCS9|F1MCS9_BOVIN	Uncharacterized protein OS=Bos taurus GN=100138788 PE=4 SV=1	BOVIN	2	0.691304		0.672977	0.506564	0.682141	0.590732	0.6989	0.81619		0.855067	0.774843	1.25893	0.646769	0.976728	0.600075	0.6989	1.18302		0.999566		0.990832	0.994006	0.995199	0.00522185	0.99
NCBI_Bias2	373	377	2.4	2.4	41.22	19.59	10.14	gi|82697351	single-stranded DNA-binding protein, mitochondrial precursor [Bos taurus]	Bos taurus	1	1	0.946789	0.990832	0.996413	0.995416	0.0506146	0.9746	0.954993	0.796917	0.990832	0.990475	0.981748	0.898429	0.975857	0.298519	0.882497	0.946237	0.749229	0.990832	0.997648	0.981748	0.856312	0.98629	0.136781	0.9277
Uni_Bias2	301	322	4.02	4.54	8.216	7.981	5.164	sp|Q3SZI8|IVD_BOVIN	Isovaleryl-CoA dehydrogenase, mitochondrial OS=Bos taurus GN=IVD PE=2 SV=1	BOVIN	2	0.886974	0.438855	0.870964	0.80034	0.878969	0.908808	0.606531	0.912525	0.524378	0.887156	0.841916	1.1272	0.77366	0.975626	0.933073	0.606531	1.1425	0.406369	1.108	0.488204	1.10662	0.814141	1.10731	0.801397	0.6376
Uni_Bias2	196	240	6.01	6.01	23.87	17.57	17.57	sp|Q17R06|RAB21_BOVIN	Ras-related protein Rab-21 OS=Bos taurus GN=RAB21 PE=2 SV=1	BOVIN	3	1.0372	0.698212	0.954993	0.90813	0.996096	0.395729	0.7985	0.915012	0.389849	1	0.971603	1.00925	0.973885	0.974755	0.866213	0.6376	0.816038	0.332737	0.921846	0.511955	0.963829	0.905893	0.942837	0.667382	0.6989
Uni_Bias2	139	66	20.52	26.58	73.73	69.02	62.35	sp|P62261|1433E_BOVIN	14-3-3 protein epsilon OS=Bos taurus GN=YWHAE PE=2 SV=1	BOVIN	24	0.993717	0.945615	1.01859	0.739622	1.00615	0.310552	0.8395	0.939798	0.529812	0.990832	0.955578	0.990832	0.902613	0.973821	0.680222	0.6989	0.920789	0.392647	0.971398	0.698623	1.02802	0.51846	0.999707	0.882084	0.6376
NCBI_Bias2	83	278	4.47	6.22	15.16	9.291	6.601	gi|296481577	lysosome-associated membrane glycoprotein 1 precursor [Bos taurus]	Bos taurus	3	1.01859	0.898656	1.02802	0.296803	1.0233	1.14788	0.535261	1.02802	0.875006	0.954993	0.867888	0.937562	0.143792	0.973524	1.92358	0.367879	0.981748	0.969635	0.972747	0.945589	1.00925	0.862263	0.991	0.177316	0.9048
Uni_Bias2	485	294	4.38	4.63	12.31	6.914	3.879	tr|A7Z066|A7Z066_BOVIN	Canx protein OS=Bos taurus GN=canx PE=2 SV=1	BOVIN	2	1.07475	0.434002	1.01859	0.703891	1.04667	1.03001	0.535261	1.01855	0.882507	0.928966	0.24278	0.972747	0.362321	0.973421	2.21995	0.324652	1.0141	0.864561	1.06797	0.326192	1.07647	0.494816	1.07222	1.58417	0.416862
Uni_Bias2	494	98	15.32	21.13	40.12	36.53	28.74	tr|B0JYN3|B0JYN3_BOVIN	L-lactate dehydrogenase OS=Bos taurus GN=LDHB PE=2 SV=1	BOVIN	10	0.961285	0.588896	0.981748	0.924435	0.971517	0.52817	0.7596	0.956278	0.433929	0.963829	0.995089	1	0.897516	0.973369	0.823353	0.6376	1.01866	0.741864	1.02105	0.709746	1.01859	0.818513	1.01982	0.471743	0.778801
Uni_Bias2	188	256	5.5	5.5	24.1	12.59	12.59	sp|Q0Z7W6|TMX1_BOVIN	Thioredoxin-related transmembrane protein 1 OS=Bos taurus GN=TMX1 PE=2 SV=1	BOVIN	3	0.986636	0.923878	0.954993	0.338639	0.970815	1.0093	0.535261	0.965128	0.727566	0.972747	0.411557	0.981748	0.911748	0.973208	1.12765	0.535261	0.91548	0.813685	0.929486	0.710571	0.963829	0.54953	0.946658	0.816803	0.6376
NCBI_Bias2	439	211	6.32	6.52	26.54	15.38	7.692	gi|94534861	Aldehyde dehydrogenase 2 family (mitochondrial) [Bos taurus]	Bos taurus	3	1.00925	0.833741	0.972747	0.855078	0.991	0.293926	0.8395	0.972747	0.767242	0.946237	0.669346	1	0.961509	0.972995	0.612927	0.6989	0.972747	0.823214	1.00925	0.777498	1.02802	0.584274	1.01863	0.685368	0.6989
NCBI_Bias2	271	33	27.54	27.54	40	36.11	27.96	gi|73587283	PKM2 protein [Bos taurus]	Bos taurus	14	1	0.805549	1	0.912072	1	0.267757	0.8395	0.954993	0.729437	0.990832	0.886818	0.972747	0.888955	0.972857	0.480596	0.778801	0.937562	0.487246	0.981748	0.912434	0.981748	0.694158	0.981748	0.396681	0.7985
NCBI_Bias2	231	87	16.29	16.29	27.05	17.93	15.92	gi|333440453	dihydrolipoyllysine-residue acetyltransferase component of pyruvate dehydrogenase complex, mitochondrial [Bos taurus]	Bos taurus	9	1	0.824765	0.981748	0.83761	0.990874	0.321256	0.8395	0.963829	0.689191	0.972747	0.88404	0.981748	0.947487	0.972775	0.477231	0.778801	0.972747	0.704954	1	0.808053	0.981748	0.900452	0.990874	0.2762	0.8395
Uni_Bias2	856	259	5.45	5.46	26.57	18.08	15.13	tr|Q3T0Y1|Q3T0Y1_BOVIN	OTU domain, ubiquitin aldehyde binding 1 OS=Bos taurus GN=OTUB1 PE=2 SV=1	BOVIN	3	0.965553	0.656306	0.928966	0.804908	0.94726	0.554295	0.6989	0.913854	0.29687	0.954993	0.857466	1.04713	0.777487	0.971992	1.40705	0.472367	0.977008	0.76571	1.02913	0.715002	1.01859	0.829368	1.02386	0.453891	0.778801
Uni_Bias2	651	317	4.04	4.33	17.01	8.505	6.701	tr|F1MRG7|F1MRG7_BOVIN	Uncharacterized protein (Fragment) OS=Bos taurus GN=ACTR2 PE=4 SV=1	BOVIN	2	1.08955	0.321402	1.08643	0.624958	1.08799	1.3942	0.472367	0.996778	0.968999	0.972747	0.849696	0.946237	0.972299	0.971921	0.193226	0.9277	0.912451	0.411805	0.995309	0.952388	1.0666	0.730143	1.03095	0.315556	0.8395
Uni_Bias2	255	148	10.15	10.15	29.97	18.4	16.32	sp|Q2TBL6|TALDO_BOVIN	Transaldolase OS=Bos taurus GN=TALDO1 PE=2 SV=1	BOVIN	7	0.966628	0.52214	0.981748	0.801964	0.974188	0.756116	0.6703	0.950534	0.328387	0.990832	0.982731	0.972747	0.913245	0.971371	1.06118	0.535261	0.948987	0.313012	0.962384	0.453675	0.954993	0.735814	0.958688	0.952975	0.606531
Uni_Bias2	571	71	19.16	19.3	55.76	36.18	33.41	tr|F1MB08|F1MB08_BOVIN	Uncharacterized protein OS=Bos taurus GN=ENO1 PE=4 SV=1	BOVIN	12	0.971977	0.525971	0.972747	0.353431	0.972362	1.46147	0.472367	0.965607	0.438254	0.963829	0.262185	0.981748	0.891741	0.970395	1.97885	0.367879	0.975802	0.637507	0.979575	0.644762	0.990832	0.992636	0.985204	0.387621	0.7985
Uni_Bias2	28	388	2.47	2.47	15.81	3.552	2.309	sp|A7YWE4|AL4A1_BOVIN	Delta-1-pyrroline-5-carboxylate dehydrogenase, mitochondrial OS=Bos taurus GN=ALDH4A1 PE=2 SV=1	BOVIN	1	1.0241	0.806329	0.981748	0.948113	1.00292	0.233255	0.882497	0.983055	0.860069	0.981748	0.968143	0.946237	0.892426	0.970347	0.257911	0.882497	0.918653	0.461879	0.954314	0.7348	0.946237	0.872757	0.950275	0.385876	0.7985
NCBI_Bias2	389	79	17.24	19.52	32.29	19.77	16.22	gi|84579841	heat shock protein 75 kDa, mitochondrial precursor [Bos taurus]	Bos taurus	15	0.981748	0.881269	0.963829	0.397755	0.972788	0.910552	0.606531	0.981748	0.941845	0.954993	0.430186	0.972747	0.836282	0.969829	0.940023	0.606531	0.972747	0.782025	0.963829	0.72482	0.981748	0.985119	0.972788	0.292562	0.8395
NCBI_Bias2	417	65	19.78	19.83	44.01	36.18	33.41	gi|87196501	alpha-enolase [Bos taurus]	Bos taurus	12	0.972747	0.693671	0.972747	0.390665	0.972747	1.13408	0.535261	0.963829	0.578994	0.963829	0.281179	0.981748	0.850135	0.969802	1.71771	0.416862	0.972747	0.752947	0.981748	0.879487	0.990832	0.967018	0.98629	0.140672	0.9277
Uni_Bias2	81	75	18.48	18.48	66.84	66.84	63.64	sp|P13696|PEBP1_BOVIN	Phosphatidylethanolamine-binding protein 1 OS=Bos taurus GN=PEBP1 PE=1 SV=2	BOVIN	19	0.897331	0.328609	0.519996	0.772141	0.708663	1.19125	0.535261	0.922318	0.22464	0.654636	0.146171	1.33045	0.245827	0.969136	4.18605	0.119433	1.05691	0.492573	1.02551	0.687094	0.990832	0.870866	1.00817	0.446064	0.7985
Uni_Bias2	414	56	21.58	24.07	58.79	40.2	37.69	sp|Q9BGI3|PRDX2_BOVIN	Peroxiredoxin-2 OS=Bos taurus GN=PRDX2 PE=2 SV=1	BOVIN	22	1.00411	0.938149	0.990832	0.462954	0.997469	0.724381	0.687289	0.925347	0.165145	1	0.118894	0.981748	0.410723	0.969032	4.18685	0.119433	0.921048	0.144766	0.997261	0.958677	0.972747	0.934805	0.985004	0.0952131	0.9512
Uni_Bias2	489	171	8.62	8.62	63.86	39.76	31.93	tr|B0JYL8|B0JYL8_BOVIN	Cofilin 1 (Non-muscle) OS=Bos taurus GN=CFL1 PE=2 SV=1	BOVIN	4	0.927818	0.607715	0.928966	0.598333	0.928392	0.878715	0.6376	0.902279	0.598504	0.937562	0.62378	1.0666	0.553688	0.968812	1.36927	0.472367	1.01515	0.889343	1.04141	0.710859	1.05682	0.57747	1.04912	0.773375	0.6703
Uni_Bias2	167	292	4.41	6.35	15.16	9.291	6.601	sp|Q05204|LAMP1_BOVIN	Lysosome-associated membrane glycoprotein 1 OS=Bos taurus GN=LAMP1 PE=1 SV=2	BOVIN	3	1.05133	0.525654	1.05682	0.160915	1.05407	2.14541	0.324652	1.00876	0.910156	0.972747	0.843956	0.92045	0.117024	0.96732	2.09258	0.324652	0.961697	0.614218	0.999591	0.995745	0.990832	0.624458	0.995211	0.412697	0.7985
NCBI_Bias2	43	232	5.73	5.73	25.54	22.28	16.85	gi|296474493	lactoylglutathione lyase [Bos taurus]	Bos taurus	5	0.946237	0.757678	0.946237	0.339883	0.946237	1.17837	0.535261	0.946237	0.588684	0.954993	0.465925	1	0.556854	0.967077	1.63212	0.416862	1	0.903967	1	0.906684	0.990832	0.728533	0.995416	0.36019	0.7985
NCBI_Bias2	313	359	2.71	16.67	31.61	17.3	10.82	gi|75062316	RecName: Full=Keratin, type II cytoskeletal 5; AltName: Full=Cytokeratin-5; Short=CK-5; AltName: Full=Keratin-5; Short=K5; AltName: Full=Type-II keratin Kb5	BOVIN	10	0.972747	0.947701	0.831764	0.151721	0.902255	1.68456	0.416862	1.0666	0.674475	0.879023	0.883753	0.954993	0.280957	0.96687	1.55213	0.416862	1.05682	0.796177	0.972747	0.816813	0.903649	0.589485	0.938198	0.634809	0.6989
NCBI_Bias2	97	406	2.07	2.24	13.9	1.536	1.075	gi|296483105	kinectin 1 [Bos taurus]	Bos taurus	1	0.946237	0.929994	0.937562	0.909638	0.9419	0.145302	0.9277	0.870964	0.798213	0.92045	0.887962	1.10662	0.824083	0.966012	0.467032	0.778801	1.02802	0.933613	1.1272	0.801523	1.1272	0.803697	1.1272	0.381983	0.7985
NCBI_Bias2	287	182	7.81	7.81	39.67	27.69	27.69	gi|74353866	Quinoid dihydropteridine reductase [Bos taurus]	Bos taurus	5	0.83946	0.339094	0.870964	0.231389	0.855212	2.21067	0.324652	1.03753	0.802613	0.903649	0.913536	0.954993	0.863124	0.96539	0.397389	0.7985	1.09648	0.535219	0.887156	0.513339	0.92045	0.425033	0.903803	1.32235	0.472367
Uni_Bias2	497	279	4.78	4.78	53.03	53.03	30.3	tr|B1GVY4|B1GVY4_BOVIN	Putative LOC507335 protein (Fragment) OS=Bos taurus GN=LOC507335 PE=4 SV=1	BOVIN	3	0.970028		0.963829	0.338399	0.966929	0.941141	0.606531	0.982128		1.00925	0.297077	0.903649	0.148412	0.96501	2.71133	0.25284	0.89327		0.880118		0.855067	0.164825	0.867592	1.56595	0.416862
Uni_Bias2	319	276	4.86	5.04	19.66	12.47	9.592	sp|Q3T0P6|PGK1_BOVIN	Phosphoglycerate kinase 1 OS=Bos taurus GN=PGK1 PE=2 SV=3	BOVIN	3	1.0428	0.771621	1.00925	0.813465	1.02603	0.404514	0.7985	0.957461	0.765412	0.990832	0.962543	0.946237	0.648764	0.964843	0.641196	0.6989	0.90667	0.543141	0.985213	0.916511	0.954993	0.853801	0.970103	0.213011	0.882497
Uni_Bias2	144	27	30.85	30.85	69.8	60.82	58.78	sp|P63103|1433Z_BOVIN	14-3-3 protein zeta/delta OS=Bos taurus GN=YWHAZ PE=1 SV=1	BOVIN	18	1.06803	0.571471	1.00925	0.615942	1.03864	0.906932	0.606531	0.945496	0.601408	0.981748	0.742713	0.963829	0.352606	0.963691	1.60544	0.416862	0.881753	0.0990688	0.993729	0.954441	0.990832	0.919909	0.992281	0.113012	0.9277
Uni_Bias2	578	395	2.31	2.31	16.23	11.69	7.143	tr|F1MC72|F1MC72_BOVIN	Uncharacterized protein (Fragment) OS=Bos taurus GN=UBE2L3 PE=4 SV=1	BOVIN	1	1.09201	0.394347	1.05682	0.703934	1.07441	1.11318	0.535261	0.936352	0.505819	0.981748	0.965064	0.972747	0.900584	0.963616	0.713848	0.6989	0.914743	0.388896	1.06425	0.525436	1.04713	0.762029	1.05569	0.795017	0.6703
Uni_Bias2	475	474	2	2	29.47	20	20	tr|A6QQV3|A6QQV3_BOVIN	LSM2 protein OS=Bos taurus GN=LSM2 PE=4 SV=1	BOVIN	1	1.70769		1.67494	0.410283	1.69132	0.773833	0.6703	1.00905		1.05682	0.891137	0.824138	0.723985	0.963335	0.380652	0.7985	0.774328		1.30726		1.30617	0.613335	1.30672	0.424605	0.7985
Uni_Bias2	354	192	7.53	7.53	33.45	24.48	18.97	sp|Q58DM8|ECHM_BOVIN	Enoyl-CoA hydratase, mitochondrial OS=Bos taurus GN=ECHS1 PE=2 SV=1	BOVIN	5	0.95528	0.701584	0.946237	0.611906	0.950759	0.734471	0.687289	0.916585	0.582427	0.963829	0.797138	1.00925	0.77132	0.963222	0.89198	0.6376	0.97872	0.826354	1.01818	0.85378	0.990832	0.989214	1.00451	0.146728	0.9277
Uni_Bias2	392	396	2.26	2.26	18.95	13.42	9.737	sp|Q5EAC6|CDC37_BOVIN	Hsp90 co-chaperone Cdc37 OS=Bos taurus GN=CDC37 PE=2 SV=1	BOVIN	2	1.11306	0.324981	1.10662	0.536762	1.10984	1.51672	0.416862	0.948351	0.587072	1.00925	0.917982	0.928966	0.721722	0.96219	0.820209	0.6376	0.844753	0.178136	0.988955	0.905388	1.02802	0.850996	1.00849	0.226476	0.882497
NCBI_Bias2	225	113	13.46	13.46	22.77	11.39	8.075	gi|329664902	neutral alpha-glucosidase AB [Bos taurus]	Bos taurus	7	1.01859	0.630317	1.01859	0.787041	1.01859	0.608887	0.6989	1.00925	0.724106	0.963829	0.113909	0.912011	0.168543	0.961698	3.71386	0.153355	0.972747	0.809196	0.981748	0.911179	0.963829	0.425537	0.972788	0.822919	0.6376
NCBI_Bias2	401	259	4.96	4.96	21.58	12.16	12.16	gi|86438477	Aminolevulinate, delta-, dehydratase [Bos taurus]	Bos taurus	3	1.13763	0.504034	1.11686	0.57067	1.12725	1.08231	0.535261	0.954993	0.84793	0.990832	0.982466	0.937562	0.813455	0.961129	0.337979	0.8395	0.879023	0.582441	1.04713	0.724809	1.05682	0.720208	1.05197	0.564637	0.6989
NCBI_Bias2	395	163	8.76	8.76	59.63	17.43	17.43	gi|85057025	ATPase inhibitory factor 1 [Bos taurus]	Bos taurus	6	1	0.863858	0.981748	0.769085	0.990874	0.355167	0.7985	0.946237	0.732189	0.981748	0.802284	0.954993	0.109228	0.960993	2.38543	0.286505	0.903649	0.347173	0.954993	0.620673	0.954993	0.133954	0.954993	2.16036	0.324652
Uni_Bias2	759	149	10.15	10.15	43.06	27.78	23.15	tr|F2Z4D5|F2Z4D5_BOVIN	Uncharacterized protein OS=Bos taurus GN=RAB11A PE=4 SV=1	BOVIN	5	1.10779	0.335782	1.00925	0.915646	1.05852	1.02443	0.535261	1.04689	0.630004	0.92045	0.355788	0.912011	0.457304	0.959783	1.97852	0.367879	0.954755	0.736778	1.00784	0.932223	1	0.860026	1.00392	0.191937	0.9048
Uni_Bias2	357	39	25.81	25.81	68.34	62.81	62.81	sp|Q5E947|PRDX1_BOVIN	Peroxiredoxin-1 OS=Bos taurus GN=PRDX1 PE=2 SV=1	BOVIN	20	0.992542	0.896605	1.00925	0.218023	1.0009	1.41779	0.472367	0.950854	0.398212	0.963829	0.0611392	0.963829	0.82328	0.959504	3.39604	0.173774	0.961334	0.501388	1.00093	0.987291	1.00925	0.601822	1.00509	0.452174	0.778801
Uni_Bias2	365	175	8.33	8.33	31.05	26.94	23.74	sp|Q5E971|TMEDA_BOVIN	Transmembrane emp24 domain-containing protein 10 OS=Bos taurus GN=TMED10 PE=2 SV=1	BOVIN	4	1.04225	0.636873	1.00925	0.670691	1.02575	0.738848	0.687289	0.965411	0.68834	0.972747	0.311508	0.937562	0.316592	0.958573	2.33646	0.286505	0.920766	0.372756	0.991663	0.922796	0.972747	0.661002	0.982205	0.429383	0.7985
NCBI_Bias2	113	151	9.61	9.8	33.12	24.2	22.29	gi|296486764	hydroxyacyl-coenzyme A dehydrogenase, mitochondrial [Bos taurus]	Bos taurus	7	0.981748	0.900724	0.963829	0.936736	0.972788	0.147582	0.9277	0.928966	0.500615	0.954993	0.746457	0.990832	0.656341	0.958264	1.22072	0.535261	0.946237	0.555157	1	0.831025	1	0.992139	1	0.167627	0.9048
NCBI_Bias2	455	379	2.35	2.35	16.34	16.34	7.19	gi|95768189	ubiquitin-conjugating enzyme E2L 3 [Bos taurus]	Bos taurus	1	1.08643	0.716344	1.0666	0.697037	1.07651	0.603245	0.6989	0.928966	0.789308	0.981748	0.969245	0.963829	0.886771	0.958181	0.337017	0.8395	0.903649	0.713974	1.05682	0.791824	1.04713	0.771498	1.05197	0.428073	0.7985
Uni_Bias2	671	223	6.37	6.37	25	21.81	16.49	tr|F1MUW8|F1MUW8_BOVIN	Uncharacterized protein (Fragment) OS=Bos taurus GN=GLO1 PE=4 SV=1	BOVIN	5	0.887474	0.204564	0.946237	0.306928	0.916856	2.40427	0.286505	0.915181	0.154163	0.954993	0.444265	1	0.494732	0.956724	2.94002	0.22313	1.04883	0.410297	1.0135	0.812956	0.990832	0.682915	1.00217	0.511133	0.7596
Uni_Bias2	54	190	7.62	7.62	60.55	26.61	26.61	sp|P01096|ATIF1_BOVIN	ATPase inhibitor, mitochondrial OS=Bos taurus GN=ATPIF1 PE=1 SV=2	BOVIN	6	0.99154	0.912644	0.981748	0.717257	0.986644	0.368047	0.7985	0.929877	0.358588	0.972747	0.995253	0.963829	0.21337	0.955485	2.23668	0.324652	0.898399	0.199806	0.954329	0.764977	0.981748	0.58889	0.968038	0.692634	0.6989
Uni_Bias2	453	250	5.71	5.71	37.1	12.37	9.894	tr|A6H797|A6H797_BOVIN	MLEC protein OS=Bos taurus GN=MLEC PE=2 SV=1	BOVIN	3	1.0683	0.624879	1.05682	0.608341	1.06256	0.840115	0.6376	0.991002	0.941971	0.954993	0.359142	0.92045	0.464315	0.955481	1.60777	0.416862	0.956238	0.729464	1.02834	0.824769	1.01859	0.469329	1.02346	0.82438	0.6376
NCBI_Bias2	67	240	5.5	5.5	32.86	12.37	9.894	gi|296478502	malectin [Bos taurus]	Bos taurus	3	1.04713	0.851807	1.0666	0.57419	1.05686	0.621206	0.6989	0.990832	0.997923	0.954993	0.375967	0.92045	0.447815	0.955425	1.54931	0.416862	0.972747	0.949154	1.02802	0.89881	1.01859	0.481172	1.0233	0.728065	0.687289
Uni_Bias2	615	124	11.99	11.99	52.17	35.75	35.75	tr|F1MJQ1|F1MJQ1_BOVIN	Uncharacterized protein OS=Bos taurus GN=RAB7A PE=4 SV=1	BOVIN	6	0.900492	0.383231	0.937562	0.564699	0.919027	1.32945	0.472367	0.901141	0.316364	0.963829	0.876188	1	0.842165	0.95499	1.26364	0.472367	0.978425	0.817168	0.97531	0.731972	0.963829	0.583437	0.96957	0.739024	0.687289
Uni_Bias2	819	335	3.77	3.94	11.24	5.124	4.298	tr|Q32S38|Q32S38_BOVIN	Glutamate-cysteine ligase catalytic subunit OS=Bos taurus GN=GCLC PE=4 SV=1	BOVIN	2	1.27746	0.250702	1.25893	0.597149	1.26819	1.64952	0.416862	0.9648	0.784498	1.01859	0.947573	0.879023	0.768494	0.954138	0.486309	0.778801	0.820183	0.301102	1.08338	0.574825	1.07647	0.831942	1.07992	0.640742	0.6989
Uni_Bias2	755	91	15.87	15.88	22.57	11.9	8.282	tr|F1N6Y1|F1N6Y1_BOVIN	Uncharacterized protein OS=Bos taurus GN=GANAB PE=4 SV=1	BOVIN	8	1.03806	0.427626	1.01859	0.773916	1.02833	0.960484	0.606531	0.984785	0.740165	0.954993	0.0423792	0.92045	0.182976	0.953409	4.48225	0.105399	0.936781	0.298423	0.985296	0.748612	0.981748	0.859893	0.983522	0.382597	0.7985
Uni_Bias2	120	425	2.05	2.05	24.35	13.91	13.91	sp|P42899|RLA2_BOVIN	60S acidic ribosomal protein P2 OS=Bos taurus GN=RPLP2 PE=3 SV=1	BOVIN	1	0.96729	0.889716	0.92045	0.785013	0.94387	0.311743	0.8395	0.922674	0.617094	0.981748	0.882037	0.954993	0.640538	0.953138	0.915234	0.606531	0.854873	0.718316	0.892547	0.512155	0.895365	0.571559	0.893956	1.06707	0.535261
NCBI_Bias2	435	258	4.97	5	23.18	16.61	14.53	gi|92098386	Pyrophosphatase (inorganic) 1 [Bos taurus]	Bos taurus	4	1.0666	0.543594	1.04713	0.5368	1.05686	1.06983	0.535261	0.963829	0.748026	1	0.950309	0.895365	0.276225	0.953065	1.41391	0.472367	0.809096	0.171592	0.895365	0.423445	0.937562	0.569844	0.916463	1.23489	0.535261
Uni_Bias2	86	352	3.23	3.24	11.34	5.882	5.882	sp|P17248|SYWC_BOVIN	Tryptophanyl-tRNA synthetase, cytoplasmic OS=Bos taurus GN=WARS PE=1 SV=3	BOVIN	2	1.02094	0.832986	0.990832	0.996264	1.00589	0.161976	0.9048	0.92511	0.67494	0.912011	0.717565	1.01859	0.893812	0.951904	0.727255	0.687289	0.989191	0.912953	1.09056	0.425475	1.10662	0.630632	1.09859	1.1427	0.535261
Uni_Bias2	62	248	5.81	5.81	41.67	33.93	33.93	sp|P05630|ATPD_BOVIN	ATP synthase subunit delta, mitochondrial OS=Bos taurus GN=ATP5D PE=1 SV=2	BOVIN	4	1.02583	0.782391	1	0.478889	1.01291	0.852683	0.6376	0.971173	0.752928	0.92045	0.172511	0.963829	0.465423	0.951817	2.43716	0.286505	0.995575	0.961235	1.0492	0.61371	1.05682	0.775254	1.05301	0.645186	0.6989
Uni_Bias2	338	214	6.66	6.75	41.72	32.52	28.83	sp|Q3ZCF3|SKP1_BOVIN	S-phase kinase-associated protein 1 OS=Bos taurus GN=SKP1 PE=2 SV=1	BOVIN	6	0.875613	0.352606	0.903649	0.251673	0.889631	2.10375	0.324652	0.896256	0.583617	0.912011	0.367189	1.04713	0.497737	0.951799	1.94396	0.367879	1.03808	0.622284	1.01179	0.918754	1.03753	0.52884	1.02466	0.626953	0.6989
NCBI_Bias2	441	323	3.67	3.67	16.67	14.07	14.07	gi|94574108	Chromosome 12 open reading frame 5 ortholog [Bos taurus]	Bos taurus	2	1.01859	0.839102	1	0.922156	1.0093	0.222762	0.882497	0.937562	0.701077	0.972747	0.94014	0.937562	0.68514	0.94929	0.690524	0.6989	0.879023	0.445374	0.954993	0.813083	0.963829	0.80985	0.959411	0.362921	0.7985
Uni_Bias2	800	244	5.95	5.96	26.14	12.16	12.16	tr|Q2KIL3|Q2KIL3_BOVIN	Delta-aminolevulinic acid dehydratase OS=Bos taurus GN=ALAD PE=2 SV=1	BOVIN	3	1.12481	0.463504	1.11686	0.575654	1.12084	1.14757	0.535261	0.909427	0.840393	0.990832	0.9837	0.946237	0.829539	0.948832	0.327636	0.8395	0.877893	0.434601	1.08882	0.765679	1.05682	0.711634	1.07282	0.527394	0.7596
Uni_Bias2	867	191	7.62	7.62	26.53	18.37	15.51	tr|Q5E9F1|Q5E9F1_BOVIN	B-cell receptor-associated protein 31 OS=Bos taurus GN=BCAP31 PE=2 SV=1	BOVIN	4	0.962233	0.680625	0.946237	0.233858	0.954235	1.59628	0.416862	0.907983	0.35453	0.937562	0.129369	1	0.904422	0.948515	2.76429	0.22313	0.956007	0.633424	1.01061	0.907991	1.00925	0.817801	1.00993	0.258541	0.8395
Uni_Bias2	656	376	2.73	2.85	16.91	4.466	3.349	tr|F1MS79|F1MS79_BOVIN	Uncharacterized protein (Fragment) OS=Bos taurus PE=4 SV=1	BOVIN	1	0.92822	0.800295	0.937562	0.66754	0.932891	0.544545	0.7596	0.875742	0.439229	0.912011	0.551403	1.05682	0.621362	0.94819	1.64499	0.416862	1.04653	0.917562	1.1086	0.516905	1.08643	0.515908	1.09751	1.14803	0.535261
NCBI_Bias2	379	353	2.81	2.82	15.03	6.1	6.1	gi|837	unnamed protein product [Bos taurus]	Bos taurus	2	1.02802	0.868801	0.990832	0.991704	1.00942	0.129396	0.9277	0.912011	0.701001	0.912011	0.720749	1.01859	0.908829	0.947538	0.67603	0.6989	0.972747	0.915917	1.08643	0.660204	1.10662	0.636114	1.09652	0.753575	0.687289
NCBI_Bias2	219	133	11.11	11.11	47.91	38.6	35.35	gi|329664122	ras-related protein Rab-5B [Bos taurus]	Bos taurus	7	1.05682	0.366182	1.02802	0.551524	1.04242	1.38948	0.472367	0.990832	0.87333	0.954993	0.588864	0.895365	0.169575	0.947063	2.11889	0.324652	0.903649	0.299595	0.954993	0.947104	0.972747	0.731577	0.96387	0.318685	0.8395
NCBI_Bias2	135	361	2.7	2.79	13.81	5.873	3.333	gi|296491005	plastin 1 [Bos taurus]	Bos taurus	1	0.912011	0.711528	0.946237	0.682079	0.929124	0.627946	0.6989	0.870964	0.603977	0.912011	0.562413	1.05682	0.639342	0.946597	1.32638	0.472367	1.05682	0.777993	1.10662	0.658912	1.08643	0.529464	1.09652	0.914671	0.606531
Uni_Bias2	540	329	4	4	6.727	2.281	2.281	tr|E1BFV0|E1BFV0_BOVIN	Uncharacterized protein OS=Bos taurus GN=KPNB1 PE=4 SV=1	BOVIN	2	0.941464	0.593518	0.937562	0.863272	0.939513	0.580837	0.6989	0.880164	0.276136	0.912011	0.779257	1.04713	0.842755	0.946434	1.48299	0.472367	0.981995	0.842785	1.04751	0.62328	1.08643	0.760316	1.06697	0.648645	0.6989
NCBI_Bias2	385	212	6.3	6.3	20.3	9.041	5.166	gi|84000361	T-complex protein 1 subunit delta [Bos taurus]	Bos taurus	4	1.02802	0.773129	1.02802	0.817569	1.02802	0.398447	0.7985	0.937562	0.642267	0.972747	0.730274	0.928966	0.442	0.946425	1.36675	0.472367	0.895365	0.429524	0.981748	0.949141	0.981748	0.824782	0.981748	0.21266	0.882497
NCBI_Bias2	203	131	11.5	11.91	42.68	25	21.34	gi|300796313	glyoxylate reductase/hydroxypyruvate reductase [Bos taurus]	Bos taurus	7	0.963829	0.860522	0.963829	0.784414	0.963829	0.341386	0.8395	0.92045	0.468078	0.954993	0.379306	0.963829	0.423802	0.946424	2.24706	0.324652	0.937562	0.57807	0.972747	0.997559	0.963829	0.680109	0.968288	0.336966	0.8395
NCBI_Bias2	421	383	2.3	3.27	20.54	6.757	6.757	gi|87578323	Peptidylprolyl isomerase D [Bos taurus]	Bos taurus	3	1.00925	0.929667	1	0.97425	1.00463	0.0860036	0.956	0.954993	0.851623	0.946237	0.781128	0.937562	0.767995	0.946264	0.583344	0.6989	0.946237	0.820432	1	0.961809	0.990832	0.988445	0.995416	0.0439179	0.9802
Uni_Bias2	50	350	3.3	3.3	14.2	14.2	14.2	sp|P00423|COX41_BOVIN	Cytochrome c oxidase subunit 4 isoform 1, mitochondrial OS=Bos taurus GN=COX4I1 PE=1 SV=1	BOVIN	2	0.956101	0.875236	0.946237	0.880385	0.951169	0.226405	0.882497	0.878374	0.433289	0.92045	0.828683	1.03753	0.886351	0.945451	0.994456	0.606531	0.977723	0.922573	1.06131	0.670894	1.0666	0.834432	1.06395	0.503911	0.7596
Uni_Bias2	738	135	10.81	11	31.21	23.89	22.29	tr|F1N338|F1N338_BOVIN	Uncharacterized protein OS=Bos taurus GN=HADH PE=4 SV=1	BOVIN	8	0.992964	0.921251	0.937562	0.745863	0.965263	0.325926	0.8395	0.921402	0.387918	0.928966	0.399333	0.981748	0.505599	0.944039	2.21224	0.324652	0.936056	0.460459	1.00593	0.960106	1	0.930019	1.00296	0.0983779	0.9512
Uni_Bias2	13	153	9.63	9.79	16.68	8.342	6.037	sp|A5D7D1|ACTN4_BOVIN	Alpha-actinin-4 OS=Bos taurus GN=ACTN4 PE=2 SV=1	BOVIN	6	0.981728	0.815274	0.954993	0.748286	0.96836	0.429258	0.7985	0.980853	0.857737	0.895365	0.377751	0.954993	0.677908	0.943737	1.31654	0.472367	0.954239	0.563526	0.953196	0.606873	1.02802	0.528004	0.990606	0.98853	0.606531
Uni_Bias2	198	318	4.04	4.04	16.67	14.07	14.07	sp|Q1JQA7|TIGAR_BOVIN	Probable fructose-2,6-bisphosphatase TIGAR OS=Bos taurus GN=TIGAR PE=2 SV=1	BOVIN	2	1.02858	0.76359	1	0.935243	1.01429	0.292431	0.8395	0.919813	0.41607	0.972747	0.939121	0.937562	0.707215	0.943374	1.11712	0.535261	0.861345	0.210952	0.960912	0.676333	0.963829	0.822544	0.962371	0.509361	0.7596
Uni_Bias2	828	467	2	2	7.648	2.294	2.294	tr|Q3SWX3|Q3SWX3_BOVIN	Aminopeptidase-like 1 OS=Bos taurus GN=NPEPL1 PE=2 SV=1	BOVIN	1	1.21623		1.19124	0.723627	1.20374	0.28097	0.8395	0.902043		0.946237	0.927928	0.981748	0.979691	0.943343	0.0827932	0.956	0.916643		1.23291		1.22462	0.682129	1.22876	0.332267	0.8395
Uni_Bias2	508	385	2.54	2.55	9.502	7.24	7.24	tr|C3V9V8|C3V9V8_BOVIN	Proteasome 26S non-ATPase subunit 9 OS=Bos taurus GN=PSMD9 PE=4 SV=1	BOVIN	2	0.969755		0.946237	0.927156	0.957996	0.0656945	0.9656	0.915509		0.963829	0.951811	0.946237	0.930082	0.941858	0.105856	0.9512	0.888954		0.939335		0.937562	0.905615	0.938448	0.086113	0.9608
Uni_Bias2	118	232	6.21	6.23	23.18	19.72	17.65	sp|P37980|IPYR_BOVIN	Inorganic pyrophosphatase OS=Bos taurus GN=PPA1 PE=1 SV=2	BOVIN	5	1.04186	0.885992	1.04713	0.554166	1.04449	0.61786	0.6989	0.930129	0.716881	1	0.946342	0.895365	0.288215	0.941831	1.41757	0.472367	0.850803	0.621021	0.953954	0.927174	0.937562	0.58093	0.945758	0.537429	0.7596
Uni_Bias2	555	18	35.41	35.44	33.76	23.97	20.94	tr|E1BL33|E1BL33_BOVIN	Uncharacterized protein OS=Bos taurus GN=NLRP8 PE=4 SV=1	BOVIN	22	1.16344	0.202549	1.25893	0.062542	1.21118	3.7946	0.135335	1.03034	0.590375	1.05682	0.31825	0.737904	0.00134497	0.941688	7.19478	0.026649	0.842408	0.1036	0.948883	0.246323	0.895365	0.262221	0.922124	2.37965	0.25284
NCBI_Bias2	165	125	11.9	11.9	15.38	14.51	12.34	gi|297483439	PREDICTED: 1-aminocyclopropane-1-carboxylate synthase-like protein 2-like [Bos taurus]	Bos taurus	8	1.02802	0.752582	1.03753	0.667868	1.03277	0.597512	0.6989	1.05682	0.605648	0.887156	0.0121421	0.879023	0.00974211	0.940999	8.28966	0.014264	1.03753	0.706053	1.00925	0.863428	1.01859	0.667325	1.01392	0.478873	0.778801
NCBI_Bias2	207	329	3.51	3.51	5.936	2.283	2.283	gi|300798217	importin subunit beta-1 [Bos taurus]	Bos taurus	2	0.963829	0.918902	0.946237	0.873997	0.955033	0.190442	0.9048	0.862979	0.62543	0.912011	0.783351	1.04713	0.854458	0.940706	0.756348	0.6703	0.981748	0.956264	1.08643	0.720132	1.08643	0.76536	1.08643	0.517444	0.7596
Uni_Bias2	723	203	7.06	7.06	28.44	10.28	6.606	tr|F1N0E5|F1N0E5_BOVIN	Uncharacterized protein OS=Bos taurus GN=CCT4 PE=4 SV=1	BOVIN	4	0.987966	0.898285	1.02802	0.83799	1.00799	0.246694	0.882497	0.909809	0.206453	0.972747	0.716708	0.937562	0.463094	0.940039	2.32833	0.286505	0.930872	0.438826	1.00776	0.907803	0.981748	0.849169	0.994756	0.226029	0.882497
NCBI_Bias2	405	210	6.51	6.59	9.317	5.963	3.851	gi|86820707	AFG3 ATPase family gene 3-like 2 (yeast) [Bos taurus]	Bos taurus	4	0.912011	0.374926	0.912011	0.180546	0.912011	2.33893	0.286505	0.887156	0.226676	0.92045	0.29606	1.00925	0.66547	0.938953	2.70017	0.25284	1.00925	0.801526	1.03753	0.538975	1.00925	0.685787	1.02339	0.864485	0.6376
Uni_Bias2	278	271	5.06	5.19	32.67	14.33	8.333	sp|Q3MHR7|ARPC2_BOVIN	Actin-related protein 2/3 complex subunit 2 OS=Bos taurus GN=ARPC2 PE=1 SV=1	BOVIN	3	1.0055	0.94638	0.972747	0.916155	0.989123	0.12393	0.9277	0.885132	0.205388	0.92045	0.550083	1.00925	0.886446	0.938278	1.99869	0.367879	0.94384	0.671093	1.06925	0.442252	1.07647	0.527715	1.07286	1.26386	0.472367
NCBI_Bias2	213	287	4.23	4.23	9.968	6.487	5.222	gi|300798636	fragile X mental retardation 1 [Bos taurus]	Bos taurus	2	1.09648	0.693786	1.08643	0.728079	1.09145	0.593192	0.6989	0.963829	0.914663	1.01859	0.919121	0.831764	0.527245	0.938061	0.706708	0.6989	0.772681	0.38548	0.879023	0.651638	0.887156	0.68229	0.883089	0.704049	0.6989
NCBI_Bias2	367	366	2.63	2.65	26.85	25	10.19	gi|81674397	Tubulin folding cofactor A [Bos taurus]	Bos taurus	1	1.15878	0.691561	1.13763	0.703097	1.1482	0.626308	0.6989	0.954993	0.926425	1.01859	0.937769	0.831764	0.644869	0.935116	0.503245	0.7596	0.77983	0.554766	0.937562	0.875075	0.937562	0.862994	0.937562	0.243894	0.882497
NCBI_Bias2	39	430	2.02	2.03	11.03	4.702	4.702	gi|296473495	putative oxidoreductase GLYR1 [Bos taurus]	Bos taurus	1	0.954993	0.835219	0.765597	0.629809	0.860295	0.557981	0.6989	0.92045	0.66672	1.00925	0.976588	0.870964	0.799951	0.933555	0.566563	0.6989	0.903649	0.579677	0.937562	0.723415	0.666807	0.493977	0.802184	0.893812	0.6376
Uni_Bias2	58	490	2	2	16.3	16.3	16.3	sp|P02638|S100B_BOVIN	Protein S100-B OS=Bos taurus GN=S100B PE=1 SV=2	BOVIN	1	1.33066		1.36773	0.614052	1.3492	0.42359	0.7985	0.965521		1.0666	0.961825	0.765597	0.621524	0.932571	0.446892	0.7985	0.71234		0.979345		0.981748	0.972772	0.980546	0.0239782	0.9864
Uni_Bias2	99	51	22.04	22.04	45.75	42.25	37.25	sp|P21327|INPP_BOVIN	Inositol polyphosphate 1-phosphatase OS=Bos taurus GN=INPP1 PE=1 SV=2	BOVIN	16	0.978334	0.825997	0.972747	0.811004	0.975541	0.347997	0.8395	0.905125	0.151434	0.946237	0.185626	0.946237	0.120522	0.932533	4.94014	0.082085	0.910266	0.0872663	0.980756	0.704042	0.981748	0.976508	0.981252	0.325451	0.8395
Uni_Bias2	688	112	13.88	13.88	21.77	18.63	15.5	tr|F1MWD3|F1MWD3_BOVIN	Uncharacterized protein (Fragment) OS=Bos taurus GN=CCT5 PE=4 SV=1	BOVIN	8	0.964536	0.561401	0.954993	0.761982	0.959764	0.737564	0.687289	0.860681	0.135492	0.937562	0.533765	0.990832	0.989672	0.929692	2.29049	0.286505	0.903834	0.181326	1.01236	0.843216	1	0.753936	1.00618	0.393454	0.7985
Uni_Bias2	792	379	2.65	2.65	8.897	4.27	2.491	tr|Q1LZC3|Q1LZC3_BOVIN	Nicalin homolog (Zebrafish) OS=Bos taurus GN=NCLN PE=2 SV=1	BOVIN	1	0.889029	0.614724	0.92045	0.403601	0.904739	1.21074	0.535261	0.996466	0.984965	0.928966	0.518875	0.862979	0.222594	0.92947	1.88801	0.367879	0.953451	0.861745	0.849265	0.360928	0.855067	0.180476	0.852166	2.37232	0.25284
Uni_Bias2	713	443	2.01	2.09	17.44	2.887	2.309	tr|F1MZG0|F1MZG0_BOVIN	Uncharacterized protein (Fragment) OS=Bos taurus GN=NLRP13 PE=4 SV=1	BOVIN	1	1.47575		1.44544	0.513746	1.46059	0.578502	0.6989	0.859727		0.903649	0.852191	1.01859	0.953118	0.927323	0.180633	0.9277	0.95536		1.63591		1.6293	0.425136	1.6326	0.742945	0.687289
Uni_Bias2	646	145	10.27	10.42	13.32	6.598	4.612	tr|F1MPU0|F1MPU0_BOVIN	Uncharacterized protein (Fragment) OS=Bos taurus GN=CLTC PE=4 SV=1	BOVIN	5	0.895805	0.18062	1.08643	0.328599	0.991115	2.45314	0.286505	0.893562	0.0844832	1	0.680829	0.887156	0.324464	0.926906	3.45805	0.173774	0.991552	0.930996	0.99144	0.885469	0.954993	0.835262	0.973216	0.262009	0.8395
NCBI_Bias2	183	90	15.76	15.76	23.66	18.67	15.53	gi|297487813	PREDICTED: chaperonin containing TCP1, subunit 5 (epsilon) [Bos taurus]	Bos taurus	9	0.981748	0.985251	0.954993	0.786463	0.96837	0.22155	0.882497	0.895365	0.294366	0.92045	0.386213	0.963829	0.750638	0.926548	2.13771	0.324652	0.92045	0.475653	1.00925	0.697878	1	0.761098	1.00463	0.54956	0.7596
NCBI_Bias2	107	223	6.01	6.01	17.27	13.37	8.078	gi|296485526	lectin, mannose-binding 2 [Bos taurus]	Bos taurus	3	0.963829	0.952274	0.963829	0.785954	0.963829	0.251682	0.8395	0.928966	0.891027	0.870964	0.34198	0.972747	0.963132	0.924226	1.06485	0.535261	1.03753	0.926381	1.07647	0.865839	1.07647	0.218607	1.07647	1.4458	0.472367
Uni_Bias2	545	239	6.01	6.01	34.22	21.33	21.33	tr|E1BI46|E1BI46_BOVIN	Putative lipoyltransferase 2, mitochondrial OS=Bos taurus GN=LIPT2 PE=3 SV=1	BOVIN	3	0.927285	0.597432	1.02802	0.893312	0.97765	0.545417	0.7596	0.905469	0.38307	0.981748	0.954061	0.879023	0.679485	0.92208	1.20993	0.535261	0.967485	0.796269	0.988342	0.907884	0.912011	0.809006	0.950176	0.268036	0.8395
Uni_Bias2	865	79	18.12	19.54	36.58	33.68	32.11	tr|Q58DI4|Q58DI4_BOVIN	Zona pellucida glycoprotein 3 preproprotein OS=Bos taurus GN=ZP3 PE=2 SV=1	BOVIN	18	1.04511	0.721944	1.41906	0.338377	1.23209	1.22419	0.535261	1.50362	0.0417481	0.691831	0.578764	0.564937	0.168333	0.92013	4.78139	0.082085	1.27564	0.023496	0.88392	0.227465	1.08643	0.779395	0.985173	1.50266	0.416862
Uni_Bias2	243	212	6.85	6.9	10.93	5.963	3.851	sp|Q2KJI7|AFG32_BOVIN	AFG3-like protein 2 OS=Bos taurus GN=AFG3L2 PE=2 SV=1	BOVIN	4	0.9056	0.166921	0.92045	0.274059	0.913025	2.67929	0.25284	0.873546	0.129288	0.895365	0.243789	0.990832	0.747024	0.919914	3.25619	0.173774	1.04632	0.494418	1.08186	0.340598	1.00925	0.326704	1.04556	1.90721	0.367879
Uni_Bias2	63	297	4.27	4.27	31.04	21.19	17.01	sp|P07688|CATB_BOVIN	Cathepsin B OS=Bos taurus GN=CTSB PE=1 SV=5	BOVIN	4	1.09903		1.07647	0.871419	1.08775	0.119546	0.9277	0.944253		0.990832	0.998004	0.824138	0.722571	0.919741	0.283975	0.882497	0.77351		0.898109		0.895365	0.835675	0.896737	0.155925	0.9048
NCBI_Bias2	1	188	7.41	7.41	25.6	14.11	12.68	gi|115304856	ARP3 actin-related protein 3 homolog (yeast) [Bos taurus]	Bos taurus	4	0.946237	0.796194	0.954993	0.778401	0.950615	0.415555	0.7985	0.870964	0.402088	0.937562	0.652586	0.946237	0.669775	0.918254	1.51023	0.416862	0.895365	0.426289	0.963829	0.832472	0.963829	0.797007	0.963829	0.356336	0.7985
Uni_Bias2	469	280	4.73	4.73	17.27	13.37	8.078	tr|A6QP36|A6QP36_BOVIN	LMAN2 protein OS=Bos taurus GN=LMAN2 PE=2 SV=1	BOVIN	3	0.896007	0.619684	0.954993	0.770605	0.9255	0.641996	0.6989	0.901554	0.529009	0.870964	0.328219	0.981748	0.953078	0.918088	1.56249	0.416862	1.05888	0.698737	1.04938	0.742529	1.07647	0.211515	1.06292	1.60789	0.416862
NCBI_Bias2	301	174	8.07	8.3	45.87	22.94	14.13	gi|74354953	CCT3 protein [Bos taurus]	Bos taurus	7	0.963829	0.753793	1.02802	0.638835	0.995923	0.634719	0.6989	0.887156	0.267742	0.946237	0.521428	0.92045	0.333855	0.917948	2.66306	0.25284	0.928966	0.52347	1.00925	0.842454	1	0.905311	1.00463	0.235312	0.882497
Uni_Bias2	667	92	15.78	15.78	28.98	20.67	15.9	tr|F1MUI1|F1MUI1_BOVIN	Uncharacterized protein OS=Bos taurus GN=TDRKH PE=4 SV=1	BOVIN	9	0.974556	0.760865	0.963829	0.698279	0.969192	0.549327	0.7596	0.958845	0.482703	0.862979	0.265998	0.928966	0.834788	0.91693	1.93973	0.367879	0.988807	0.88524	1.00312	0.957629	1.03753	0.663166	1.02032	0.394361	0.7985
NCBI_Bias2	327	183	7.71	7.71	26.84	24.24	21.65	gi|76622717	PREDICTED: eukaryotic translation initiation factor 4E family member 1B-like [Bos taurus]	Bos taurus	4	0.954993	0.788727	0.954993	0.809082	0.954993	0.390161	0.7985	0.862979	0.24113	0.903649	0.373849	0.981748	0.810553	0.916125	2.27254	0.286505	0.946237	0.572027	1.04713	0.660327	1.03753	0.652384	1.04233	0.731475	0.687289
NCBI_Bias2	307	485	2	2	5.435	5.435	5.435	gi|75052594	RecName: Full=GTP-binding protein Rheb; AltName: Full=Ras homolog enriched in brain; Flags: Precursor	BOVIN	1	1.07647	0.867327	1.0666	0.88725	1.07153	0.227542	0.882497	0.912011	0.871952	0.972747	0.965849	0.862979	0.778285	0.915912	0.366919	0.7985	0.801678	0.683807	0.946237	0.919815	0.937562	0.917456	0.9419	0.147429	0.9277
Uni_Bias2	342	312	4.07	4.3	18.53	13.13	11.2	sp|Q3ZCH9|HDHD2_BOVIN	Haloacid dehalogenase-like hydrolase domain-containing protein 2 OS=Bos taurus GN=HDHD2 PE=2 SV=1	BOVIN	2	0.908137	0.322233	0.887156	0.464961	0.897647	1.64883	0.416862	0.840367	0.118576	0.887156	0.474685	1.01859	0.825965	0.915372	2.66527	0.25284	0.929987	0.463124	1.0018	0.985038	1.01859	0.840101	1.0102	0.164431	0.9048
NCBI_Bias2	191	126	11.88	11.88	17.21	9.654	7.975	gi|297491631	PREDICTED: oxoglutarate dehydrogenase-like isoform 2 [Bos taurus]	Bos taurus	6	1.04713	0.657614	1.08643	0.512212	1.06678	0.94516	0.606531	0.981748	0.949962	0.946237	0.885517	0.816582	0.148887	0.914856	1.80448	0.367879	0.92045	0.569585	0.981748	0.942474	0.928966	0.696447	0.955357	0.365686	0.7985
Uni_Bias2	722	207	6.97	7	20.26	13.77	13.77	tr|F1N049|F1N049_BOVIN	Uncharacterized protein (Fragment) OS=Bos taurus GN=ACTR3 PE=4 SV=1	BOVIN	4	1.01676	0.814848	0.972747	0.912801	0.994756	0.257094	0.8395	0.885803	0.143134	0.928966	0.602934	0.928966	0.554289	0.914579	2.6405	0.25284	0.836057	0.067005	0.956879	0.567107	0.972747	0.853216	0.964813	0.630553	0.6989
Uni_Bias2	311	194	7.35	7.66	43.3	19.45	10.64	sp|Q3T0K2|TCPG_BOVIN	T-complex protein 1 subunit gamma OS=Bos taurus GN=CCT3 PE=1 SV=1	BOVIN	6	0.987545	0.896256	0.946237	0.607867	0.966891	0.527518	0.7596	0.849368	0.145706	0.928966	0.47818	0.963829	0.774703	0.914054	2.53559	0.25284	0.864933	0.140026	1.00327	0.973	0.981748	0.939556	0.99251	0.0779291	0.9656
Uni_Bias2	720	231	6.25	6.25	26.97	17.01	14.52	tr|F1N030|F1N030_BOVIN	Uncharacterized protein (Fragment) OS=Bos taurus GN=EIF4E1B PE=4 SV=1	BOVIN	3	0.952854	0.522992	0.954993	0.789457	0.953923	0.768352	0.6703	0.856614	0.0919509	0.903649	0.366782	0.981748	0.839934	0.914004	3.09558	0.196912	0.940264	0.47384	1.04383	0.575958	1.04713	0.633213	1.04548	0.87612	0.6376
Uni_Bias2	295	108	14.19	14.19	32.92	28.01	22.6	sp|Q3SZ65|IF4A2_BOVIN	Eukaryotic initiation factor 4A-II OS=Bos taurus GN=EIF4A2 PE=2 SV=1	BOVIN	10	0.750929		0.731139	0.582968	0.741034	0.46871	0.778801	0.820765		0.862979	0.782879	1.05682	0.889062	0.91352	0.314747	0.8395	0.994382		0.907559		0.903649	0.851692	0.905604	0.139435	0.9277
NCBI_Bias2	167	374	2.46	2.62	32.14	16.07	7.738	gi|297485957	PREDICTED: ribosomal protein SA-like [Bos taurus]	Bos taurus	1	0.772681	0.47734	0.895365	0.551238	0.834023	1.15967	0.535261	0.801678	0.546753	0.928966	0.66617	1.00925	0.882193	0.913299	0.98612	0.606531	1.07647	0.762533	1.03753	0.88636	0.972747	0.970625	1.00514	0.130676	0.9277
NCBI_Bias2	173	414	2.05	2.11	18.69	2.91	1.764	gi|297486214	PREDICTED: NLR family, pyrin domain containing 2-like [Bos taurus]	Bos taurus	1	1.27057	0.488461	1.23595	0.454881	1.25326	1.30655	0.472367	0.895365	0.704907	0.946237	0.833819	0.887156	0.685679	0.909586	0.789351	0.6703	0.83946	0.610741	1.19124	0.556826	1.15878	0.539945	1.17501	1.04386	0.535261
NCBI_Bias2	391	92	15.45	15.45	60.32	53.17	45.24	gi|84708665	Ubiquitin carboxyl-terminal esterase L1 (ubiquitin thiolesterase) [Bos taurus]	Bos taurus	20	0.847227	0.3999	0.698232	0.534037	0.77273	1.34095	0.472367	0.765597	0.336471	0.765597	0.814506	1.19124	0.960144	0.907478	1.15964	0.535261	0.972747	0.768052	1.07647	0.867041	1.0666	0.731229	1.07153	0.395814	0.7985
Uni_Bias2	93	219	6.46	6.57	27.5	14.04	7.692	sp|P20000|ALDH2_BOVIN	Aldehyde dehydrogenase, mitochondrial OS=Bos taurus GN=ALDH2 PE=1 SV=2	BOVIN	3	1.01363	0.867041	0.972747	0.796117	0.99319	0.321967	0.8395	0.881055	0.400896	0.903649	0.246773	0.937562	0.293005	0.907422	3.07559	0.196912	0.931511	0.410691	1.06969	0.554504	1.00925	0.774157	1.03947	0.734533	0.687289
Uni_Bias2	102	406	2.13	7.3	23.71	11.41	9.396	sp|P21856|GDIA_BOVIN	Rab GDP dissociation inhibitor alpha OS=Bos taurus GN=GDI1 PE=1 SV=1	BOVIN	4	0.835238	0.418265			0.835238	0.757096	0.6703	0.907375	0.662805					0.907375	0.357228	0.7985	1.13611	0.31805	1.04452	0.810087			1.04452	0.182937	0.9048
Uni_Bias2	20	252	5.62	5.69	15.12	7.56	6.186	sp|A6QLV3|SHOC2_BOVIN	Leucine-rich repeat protein SHOC-2 OS=Bos taurus GN=SHOC2 PE=2 SV=1	BOVIN	3	1.06032	0.756033	1.00925	0.720179	1.03479	0.528037	0.7596	0.920365	0.483571	0.879023	0.118193	0.903649	0.541261	0.901012	3.01908	0.196912	0.883867	0.558392	1.01565	0.916747	1.03753	0.76789	1.02659	0.304903	0.8395
Uni_Bias2	204	241	6	6.01	27.66	15.96	15.96	sp|Q24JY6|TM160_BOVIN	Transmembrane protein 160 OS=Bos taurus GN=TMEM160 PE=2 SV=1	BOVIN	4	1.25242	0.130249	1.24738	0.532793	1.2499	2.31733	0.286505	1.0129	0.903113	0.879023	0.757191	0.809096	0.667735	0.900341	0.680897	0.6989	0.851349	0.216009	1.05024	0.612159	1.14815	0.607732	1.0992	0.858846	0.6376
Uni_Bias2	531	224	6.34	6.45	11.18	11.18	9.938	tr|E1BDM8|E1BDM8_BOVIN	Uncharacterized protein OS=Bos taurus GN=DDX6 PE=3 SV=1	BOVIN	4	1.08746	0.555589	1.05682	0.278025	1.07214	1.62233	0.416862	0.941028	0.650983	0.912011	0.313274	0.847227	0.173793	0.900089	2.90095	0.22313	0.939537	0.646511	1.08185	0.753653	0.981748	0.793274	1.0318	0.44681	0.7985
NCBI_Bias2	365	458	2	2.01	8.832	2.849	2.849	gi|81674303	Prostaglandin reductase 2 [Bos taurus]	Bos taurus	1	1.01859	0.959097	1	0.979732	1.0093	0.0540598	0.9704	0.870964	0.795903	0.92045	0.885481	0.903649	0.846214	0.898354	0.448961	0.7985	0.83946	0.743999	0.981748	0.981599	0.981748	0.979204	0.981748	0.0343854	0.9827
Uni_Bias2	232	236	6.07	6.08	23.36	8.411	7.076	sp|Q2KIA5|DNM1L_BOVIN	Dynamin-1-like protein OS=Bos taurus GN=DNM1L PE=2 SV=1	BOVIN	4	0.846036	0.59757	0.879023	0.255778	0.862529	1.6315	0.416862	0.869273	0.548087	0.824138	0.227362	1	0.610837	0.897804	2.23701	0.324652	1.03785	0.844661	1.00742	0.982203	1.05682	0.475287	1.03212	0.661685	0.6989
Uni_Bias2	684	183	7.88	7.88	36.82	19.59	19.59	tr|F1MW60|F1MW60_BOVIN	Uncharacterized protein OS=Bos taurus GN=PDXP PE=4 SV=1	BOVIN	4	0.828686	0.0917718	0.809096	0.315292	0.818891	3.07716	0.196912	0.746306	0.0318596	0.787046	0.228199	1.15878	0.357653	0.897376	5.16997	0.07244	1.05529	0.631002	1.16794	0.20885	1.19124	0.258377	1.17959	2.53582	0.25284
Uni_Bias2	575	130	11.55	11.55	18.18	17.15	14.58	tr|F1MBE7|F1MBE7_BOVIN	Uncharacterized protein (Fragment) OS=Bos taurus GN=ACCSL PE=4 SV=1	BOVIN	8	0.999842	0.998477	0.990832	0.951396	0.995337	0.0446009	0.9802	1.00397	0.961476	0.847227	0.0120552	0.83946	0.0103684	0.896887	7.84035	0.016163	0.983101	0.836468	0.976543	0.773736	0.990832	0.828917	0.983687	0.385792	0.7985
Uni_Bias2	106	354	3.16	4.41	19.73	6.757	6.757	sp|P26882|PPID_BOVIN	Peptidyl-prolyl cis-trans isomerase D OS=Bos taurus GN=PPID PE=1 SV=6	BOVIN	3	0.827827	0.582848	1	0.978492	0.913913	0.487775	0.778801	0.805202	0.300752	0.946237	0.774029	0.937562	0.770127	0.896334	1.49295	0.472367	1.07948	0.787141	1.10631	0.528578	0.990832	0.982716	1.04857	0.568925	0.6989
Uni_Bias2	344	163	9.07	9.07	24.82	14.96	8.029	sp|Q3ZCI9|TCPQ_BOVIN	T-complex protein 1 subunit theta OS=Bos taurus GN=CCT8 PE=1 SV=3	BOVIN	4	0.944196	0.386702	0.496592	0.586543	0.720394	1.28865	0.472367	0.878949	0.0447528	0.487529	0.437978	1.31826	0.886657	0.894911	3.51994	0.153355	0.957272	0.470386	1.0257	0.646657	1.21339	0.699595	1.11955	0.688959	0.6989
NCBI_Bias2	143	3	72.72	72.72	61.34	55.52	46.95	gi|297472337	PREDICTED: egg and embryo abundant-peptidyl arginine deiminase-like protein-like [Bos taurus]	Bos taurus	79	2.1677	0.368803	2.51189	0.21507	2.3398	2.20125	0.324652	1.05682	0.0309505	1.1695	0.00109279	0.457088	2.9657e-06	0.894468	19.9973	0.0001	0.457088	0.000383454	0.937562	0.435997	0.954993	0.443068	0.946277	1.42809	0.472367
NCBI_Bias2	127	127	11.84	11.84	33.78	29.39	27.03	gi|296489558	tudor and KH domain containing [Bos taurus]	Bos taurus	8	1	0.867081	1.01859	0.871439	1.0093	0.243406	0.882497	0.92045	0.677153	0.855067	0.289867	0.903649	0.643763	0.893055	1.79678	0.367879	0.937562	0.695636	1.01859	0.846928	1.07647	0.319053	1.04753	1.13658	0.535261
Uni_Bias2	711	38	26.94	31.68	40.2	21.84	17.25	tr|F1MZ62|F1MZ62_BOVIN	Uncharacterized protein OS=Bos taurus GN=HSP90B1 PE=4 SV=1	BOVIN	18	0.970856	0.560725	0.954993	0.508375	0.962925	1.09013	0.535261	1.01273	0.802382	0.824138	0.000404045	0.83946	0.0032894	0.892109	11.9441	0.002479	1.03028	0.590666	0.985502	0.773402	0.972747	0.487499	0.979124	0.847242	0.6376
Uni_Bias2	698	290	4.46	4.46	32.1	5.166	2.952	tr|F1MWR8|F1MWR8_BOVIN	Uncharacterized protein OS=Bos taurus GN=CCT7 PE=4 SV=1	BOVIN	2	0.869709	0.437118	0.879023	0.646405	0.874366	1.09779	0.535261	0.81878	0.140165	0.870964	0.621319	0.981748	0.964841	0.890497	2.15118	0.324652	0.947081	0.717813	1.0027	0.977316	0.990832	0.995955	0.996765	0.0234505	0.9864
NCBI_Bias2	427	518	1.31	1.31	12.4	4.959	4.959	gi|88954097	TIP41, TOR signaling pathway regulator-like (S. cerevisiae) [Bos taurus]	Bos taurus	1	0.862979	0.782256	0.887156	0.399392	0.875067	1.0105	0.535261	0.92045	0.876013	0.895365	0.485147	0.855067	0.307215	0.890294	1.76835	0.367879	0.928966	0.895497	0.870964	0.800294	0.847227	0.267285	0.859095	1.33955	0.472367
NCBI_Bias2	205	202	6.78	6.81	13.99	5.711	4.662	gi|300796697	ubiquitin carboxyl-terminal hydrolase 5 [Bos taurus]	Bos taurus	3	1.01859	0.7801	1.01859	0.756847	1.01859	0.457683	0.778801	0.855067	0.194407	0.92045	0.349307	0.887156	0.211207	0.887557	3.68674	0.153355	0.816582	0.121833	0.981748	0.923555	0.981748	0.927801	0.981748	0.134165	0.9277
Uni_Bias2	677	35	28.31	28.38	59.23	40.99	34.46	tr|F1MV80|F1MV80_BOVIN	Uncharacterized protein OS=Bos taurus GN=614702 PE=4 SV=1	BOVIN	14	1.00086	0.983866	0.642688	0.177919	0.821772	1.51368	0.416862	0.991354	0.862093	0.619441	0.063216	1.04713	0.651929	0.885975	2.89884	0.22313	0.975656	0.546953	0.982826	0.671159	1.14815	0.881972	1.06549	0.455439	0.778801
Uni_Bias2	207	229	6.25	6.25	18.39	6.567	6.191	sp|Q28034|GLU2B_BOVIN	Glucosidase 2 subunit beta OS=Bos taurus GN=PRKCSH PE=2 SV=1	BOVIN	3	0.966745	0.502277	0.981748	0.999357	0.974246	0.598673	0.6989	0.896248	0.0531616	0.903649	0.707302	0.855067	0.41814	0.884988	3.60695	0.153355	0.900039	0.0601089	0.968563	0.527104	0.928966	0.65078	0.948765	0.929339	0.606531
Uni_Bias2	771	325	4	4.02	17.59	6.988	6.988	tr|Q0IIH5|Q0IIH5_BOVIN	Nucleobindin 2 OS=Bos taurus GN=NUCB2 PE=2 SV=1	BOVIN	2	1.31664		1.28233	0.625835	1.29949	0.407081	0.7985	0.897473		0.946237	0.919787	0.809096	0.695545	0.884269	0.387975	0.7985	0.757708		1.10889		1.10662	0.8294	1.10776	0.162472	0.9048
Uni_Bias2	742	213	6.71	6.73	14.73	6.872	5.61	tr|F1N3P2|F1N3P2_BOVIN	Uncharacterized protein OS=Bos taurus GN=USP5 PE=4 SV=1	BOVIN	3	0.9718	0.705246	1.03753	0.566716	1.00466	0.796588	0.6703	0.819114	0.0668243	0.937562	0.509233	0.887156	0.243913	0.881277	4.16183	0.119433	0.835191	0.0755357	0.988616	0.873371	0.981748	0.95788	0.985182	0.15498	0.9048
Uni_Bias2	817	146	10.26	10.26	24.09	17.82	15.84	tr|Q32LG7|Q32LG7_BOVIN	STIP1 homology and U-box containing protein 1 OS=Bos taurus GN=LOC504565 PE=2 SV=1	BOVIN	5	1.08015	0.240006	1.08643	0.376926	1.08329	2.08704	0.324652	0.953631	0.449263	0.928966	0.80778	0.751623	0.0537996	0.878073	3.41885	0.173774	0.813438	0.0160598	0.919504	0.206941	0.879023	0.290067	0.899263	2.44331	0.25284
Uni_Bias2	861	307	4.13	4.13	15.94	7.66	7.66	tr|Q3ZCI4|Q3ZCI4_BOVIN	6-phosphogluconate dehydrogenase, decarboxylating OS=Bos taurus GN=PGD PE=2 SV=2	BOVIN	2	1.16018	0.242728	4.13048	0.0960902	2.64533	3.2644	0.173774	0.972555	0.787516	1.04713	0.692815	0.613762	0.220705	0.877815	1.83862	0.367879	0.898418	0.366467	1.06894	0.54316	2.39883	0.248428	1.73389	1.73975	0.416862
Uni_Bias2	227	251	5.63	5.63	44	38.22	29.33	sp|Q2KHU0|SERB_BOVIN	Phosphoserine phosphatase OS=Bos taurus GN=PSPH PE=2 SV=1	BOVIN	3	0.978391	0.814542	0.937562	0.841252	0.957976	0.32832	0.8395	0.92097	0.421397	0.903649	0.644037	0.801678	0.436809	0.875433	1.85221	0.367879	0.85106	0.187944	0.90172	0.334915	0.824138	0.581019	0.862929	1.42175	0.472367
NCBI_Bias2	393	286	4.25	4.25	31.12	5.157	2.947	gi|84708838	Chaperonin containing TCP1, subunit 7 (eta) [Bos taurus]	Bos taurus	2	0.912011	0.686184	0.912011	0.662361	0.912011	0.68493	0.6989	0.816582	0.358905	0.862979	0.482056	0.946237	0.822632	0.875266	1.69343	0.416862	0.895365	0.612408	1	0.947276	1	0.946296	1	0.0949933	0.9512
NCBI_Bias2	305	214	6.26	6.26	16.14	6.567	6.191	gi|74356454	Protein kinase C substrate 80K-H [Bos taurus]	Bos taurus	3	0.963829	0.768576	0.937562	0.833817	0.950696	0.386484	0.7985	0.912011	0.350633	0.862979	0.521841	0.847227	0.339149	0.874072	2.41444	0.286505	0.912011	0.344736	0.963829	0.759107	0.92045	0.58857	0.942139	0.699798	0.6989
Uni_Bias2	729	103	14.76	14.76	24.09	16.85	15.4	tr|F1N103|F1N103_BOVIN	Uncharacterized protein OS=Bos taurus PE=4 SV=1	BOVIN	9	0.976599	0.732714	0.57544	0.766264	0.776019	0.501374	0.7596	0.933109	0.225347	0.510505	0.0426374	1.1695	0.0596498	0.871038	6.4835	0.038774	0.973697	0.631108	1.0159	0.80852	1.33045	0.726222	1.17318	0.46248	0.778801
Uni_Bias2	553	83	17.66	17.66	34.49	24.28	21.58	tr|E1BKZ1|E1BKZ1_BOVIN	Uncharacterized protein OS=Bos taurus GN=GSR PE=3 SV=1	BOVIN	14	1.03873	0.572884	2.05116	0.227567	1.54494	1.76965	0.367879	0.912477	0.238032	0.990832	0.19486	0.704693	0.0843189	0.869334	4.81543	0.082085	0.895295	0.13925	1.01717	0.765291	1.34276	0.380577	1.17997	1.07146	0.535261
Uni_Bias2	496	263	5.27	55.35	58.48	45.47	41.68	tr|B0JYQ0|B0JYQ0_BOVIN	ALB protein OS=Bos taurus GN=ALB PE=2 SV=1	BOVIN	34	0.813023	0.136616	0.831764	0.338611	0.822393	2.6696	0.25284	0.72054	0.105725	0.809096	0.272913	1.07647	0.616373	0.868701	3.49991	0.173774	0.947386	0.590128	1.06639	0.664076	1.10662	0.490153	1.08651	0.9749	0.606531
Uni_Bias2	689	160	9.26	9.26	13.14	6.863	5.294	tr|F1MWG1|F1MWG1_BOVIN	Uncharacterized protein (Fragment) OS=Bos taurus GN=OGDHL PE=4 SV=1	BOVIN	5	1.0669	0.446143	1.01859	0.763754	1.04274	0.935144	0.606531	1.01041	0.878974	0.77983	0.565544	0.809096	0.139388	0.866444	2.31867	0.286505	0.914499	0.23707	0.962721	0.585477	1.05682	0.458799	1.00977	1.14173	0.535261
NCBI_Bias2	311	94	14.98	14.98	27.09	16.91	15.45	gi|75057908	RecName: Full=Cochlin; Flags: Precursor	BOVIN	8	0.954993	0.666888	0.57544	0.724366	0.765216	0.631978	0.6989	0.937562	0.383359	0.519996	0.0455152	1.13763	0.0548796	0.865062	6.03765	0.043937	1	0.920976	1.01859	0.720331	1.2942	0.759639	1.15639	0.523721	0.7596
NCBI_Bias2	355	177	7.97	7.97	22.74	18.63	15.62	gi|78369282	spermine synthase [Bos taurus]	Bos taurus	5	1.1695	0.185369	2.05116	0.0609998	1.61033	3.89327	0.135335	0.990832	0.971683	1.07647	0.962295	0.524807	0.0515358	0.864035	2.63412	0.25284	0.809096	0.119374	0.963829	0.788986	1.01859	0.825725	0.99121	0.372191	0.7985
NCBI_Bias2	151	179	7.92	7.95	25.27	12.91	12.91	gi|297476872	PREDICTED: cyclin I family, member 2-like [Bos taurus]	Bos taurus	4	1.07647	0.595187	1.1695	0.727648	1.12298	0.726851	0.687289	0.937562	0.740271	0.954993	0.844153	0.698232	0.335863	0.863596	1.35605	0.472367	0.794328	0.214505	0.912011	0.582892	0.855067	0.622566	0.883539	0.880454	0.6376
NCBI_Bias2	181	34	27.11	27.19	57.01	42.31	34.62	gi|297487734	PREDICTED: hypothetical protein [Bos taurus]	Bos taurus	15	0.963829	0.676214	0.636796	0.186437	0.800312	1.79876	0.367879	0.972747	0.714875	0.591562	0.0397515	0.990832	0.500469	0.851714	3.69408	0.153355	0.981748	0.912545	0.981748	0.87083	1.13763	0.924985	1.05969	0.187864	0.9048
NCBI_Bias2	375	253	5.09	5.09	41.51	34.91	34.91	gi|83035079	glutaredoxin-1 [Bos taurus]	Bos taurus	4	0.928966	0.702796	0.887156	0.480031	0.908061	0.943804	0.606531	0.912011	0.743519	0.717794	0.29498	0.92045	0.957697	0.850085	1.35537	0.472367	1.04713	0.611783	1.0666	0.639608	1.13763	0.606733	1.10211	0.822177	0.6376
Uni_Bias2	288	255	5.5	5.51	12.7	4.779	4.779	sp|Q3SYU2|EF2_BOVIN	Elongation factor 2 OS=Bos taurus GN=EEF2 PE=2 SV=3	BOVIN	4	1.05359	0.649888	1.03753	0.870887	1.04556	0.494399	0.778801	0.84423	0.172794	0.887156	0.706294	0.816582	0.514646	0.849323	2.40395	0.286505	0.766007	0.0824681	0.953411	0.61658	0.954993	0.883142	0.954202	0.52796	0.7596
NCBI_Bias2	425	319	3.81	3.83	8.508	3.73	2.564	gi|88909609	RecName: Full=Elongation factor 2; Short=EF-2	BOVIN	2	1.05682	0.831684	1.03753	0.863428	1.04717	0.287631	0.8395	0.83946	0.577329	0.887156	0.706469	0.816582	0.504682	0.847733	1.37293	0.472367	0.758578	0.395824	0.946237	0.879802	0.946237	0.875716	0.946237	0.226503	0.882497
Uni_Bias2	744	4	75.28	75.28	62.79	50.43	47.27	tr|F1N404|F1N404_BOVIN	Uncharacterized protein (Fragment) OS=Bos taurus GN=PADI6 PE=4 SV=1	BOVIN	82	1.01002	0.851957	2.33346	0.249673	1.67174	1.34442	0.472367	0.889149	0.001512	1.14815	0.000665092	0.505825	2.86993e-06	0.847709	23.0794	0.0001	0.852328	0.000977535	0.964876	0.19365	0.981748	0.488559	0.973312	2.04813	0.324652
Uni_Bias2	411	334	3.89	11.61	38.32	27.37	23.72	sp|Q9BGI2|PRDX4_BOVIN	Peroxiredoxin-4 OS=Bos taurus GN=PRDX4 PE=2 SV=1	BOVIN	9	1.11238	0.483603	1.05682	0.643244	1.0846	1.01427	0.535261	0.888972	0.7078	0.824138	0.0440318	0.824138	0.226576	0.845749	4.30222	0.105399	1.12911	0.461615	1.40017	0.548024	1.05682	0.561582	1.22849	1.02357	0.535261
NCBI_Bias2	11	78	17.44	17.44	31.21	24.28	21.58	gi|166795315	glutathione reductase, mitochondrial [Bos taurus]	Bos taurus	14	1.07647	0.470942	1.85353	0.262055	1.465	1.81728	0.367879	1.00925	0.388278	0.895365	0.0340594	0.619441	0.0201506	0.841353	7.14866	0.026649	0.92045	0.146468	0.981748	0.953002	1.21339	0.41109	1.09757	0.813938	0.6376
Uni_Bias2	536	85	17.23	17.23	65.82	61.73	53.57	tr|E1BFC9|E1BFC9_BOVIN	Uncharacterized protein OS=Bos taurus PE=4 SV=1	BOVIN	18	0.994615	0.977069	0.724436	0.941422	0.859526	0.0725808	0.9608	0.865161	0.270372	0.648634	0.00191135	1.00925	0.00421928	0.841016	11.3229	0.003183	0.87607	0.262139	1.0071	0.918433	1.14815	0.604383	1.07763	0.51128	0.7596
Uni_Bias2	811	152	9.83	9.83	17.81	14.25	14.25	tr|Q2NL07|Q2NL07_BOVIN	FDPS protein OS=Bos taurus GN=FDPS PE=2 SV=1	BOVIN	6	1.01419	0.834868	1.02802	0.877071	1.0211	0.270695	0.8395	0.923313	0.284362	0.847227	0.385947	0.737904	0.323366	0.836148	2.89981	0.22313	0.876669	0.289059	0.96102	0.583298	0.887156	0.948358	0.924088	0.514275	0.7596
Uni_Bias2	334	423	2.05	2.07	23.9	5.22	5.22	sp|Q3ZBV1|IST1_BOVIN	IST1 homolog OS=Bos taurus GN=IST1 PE=2 SV=1	BOVIN	1	0.640515		0.625173	0.449014	0.632844	0.695481	0.6989	0.818597		0.862979	0.779068	0.809096	0.6961	0.830224	0.531505	0.7596	0.758036		0.591685		0.586138	0.410404	0.588912	0.773578	0.6703
Uni_Bias2	801	315	4.06	4.06	9.225	4.244	4.244	tr|Q2KIQ1|Q2KIQ1_BOVIN	Phosphoglucomutase 3 OS=Bos taurus GN=PGM3 PE=2 SV=1	BOVIN	2	1.0955	0.526098	1.05682	0.932843	1.07616	0.61825	0.6989	0.902902	0.489849	0.809096	0.641795	0.772681	0.668011	0.828226	1.35552	0.472367	0.81519	0.476497	0.985663	0.930115	1.00925	0.897747	0.997458	0.156618	0.9048
NCBI_Bias2	179	86	16.3	16.8	28.59	16.22	10.9	gi|297487218	PREDICTED: N-ethylmaleimide-sensitive factor [Bos taurus]	Bos taurus	7	1.27057	0.287401	1.51356	0.27435	1.39207	2.20641	0.324652	0.895365	0.41049	0.855067	0.576687	0.717794	0.198167	0.822742	2.65745	0.25284	0.772681	0.161835	1.08643	0.643137	1.31826	0.606624	1.20234	0.817553	0.6376
Uni_Bias2	266	383	2.57	2.57	8.094	6.115	3.237	sp|Q32L40|TCPA_BOVIN	T-complex protein 1 subunit alpha OS=Bos taurus GN=TCP1 PE=1 SV=1	BOVIN	2	0.902503	0.513208	0.903649	0.842931	0.903076	0.72783	0.687289	0.759077	0.27397	0.831764	0.720382	0.870964	0.793085	0.820602	1.61083	0.416862	0.863792	0.499196	1.02446	0.926203	0.946237	0.9246	0.985348	0.13468	0.9277
Uni_Bias2	511	266	5.2	5.2	41.9	35.24	35.24	tr|E1B773|E1B773_BOVIN	Uncharacterized protein OS=Bos taurus PE=4 SV=1	BOVIN	4	0.874419	0.250544	0.887156	0.470961	0.880788	1.85626	0.367879	0.812319	0.29827	0.704693	0.291159	0.92045	0.937529	0.812487	2.17855	0.324652	1.0594	0.788781	1.14094	0.249648	1.14815	0.594133	1.14455	1.65758	0.416862
Uni_Bias2	66	514	1.67	1.77	9.959	9.959	3.32	sp|P08166|KAD2_BOVIN	Adenylate kinase 2, mitochondrial OS=Bos taurus GN=AK2 PE=1 SV=2	BOVIN	1	1.12558		1.09648	0.834639	1.11103	0.157003	0.9048	0.777757		0.816582	0.708705	0.83946	0.74317	0.811267	0.556892	0.6989	0.785349		1.1338		1.1272	0.796313	1.1305	0.197832	0.9048
NCBI_Bias2	61	60	20.7	26.08	50.1	39.2	28.3	gi|296476317	keratin, type I cytoskeletal 14 [Bos taurus]	Bos taurus	20	0.912011	0.710979	0.570164	0.153238	0.741088	1.92556	0.367879	1.1272	0.569824	0.591562	0.206005	0.698232	0.433055	0.805664	2.58768	0.25284	1.09648	0.630389	0.895365	0.645338	0.672977	0.0553703	0.784171	2.89387	0.22313
Uni_Bias2	682	416	2.08	2.08	16.74	7.296	4.292	tr|F1MVV5|F1MVV5_BOVIN	Uncharacterized protein OS=Bos taurus GN=MAPK4 PE=4 SV=1	BOVIN	1	0.966634		0.946237	0.921986	0.956436	0.0705511	0.9608	0.761503		0.801678	0.681654	0.847227	0.753992	0.803469	0.578138	0.6989	0.791507		1.00227		1	0.989606	1.00114	0.0090755	0.99
NCBI_Bias2	353	186	7.44	7.44	31.08	19.59	19.59	gi|78045487	pyridoxal phosphate phosphatase [Bos taurus]	Bos taurus	4	0.654636	0.414317	0.816582	0.323584	0.735609	1.74536	0.416862	0.465586	0.184408	0.794328	0.229934	1.14815	0.37014	0.802689	3.6085	0.153355	1.21339	0.612368	1.72187	0.273878	1.19124	0.262533	1.45656	2.28652	0.25284
NCBI_Bias2	235	466	2	2	10.28	5	2.778	gi|337	extracellular signal-regulated kinase (ERK2) [Bos taurus]	Bos taurus	1	0.963829	0.948356	0.946237	0.927869	0.955033	0.111084	0.9277	0.758578	0.614512	0.801678	0.683765	0.83946	0.747131	0.799905	1.00633	0.535261	0.787046	0.656695	1	0.992012	0.990832	0.994409	0.995416	0.0118367	0.9864
Uni_Bias2	74	93	15.74	15.84	35.82	21.54	18.9	sp|P11179|ODO2_BOVIN	Dihydrolipoyllysine-residue succinyltransferase component of 2-oxoglutarate dehydrogenase complex, mitochondrial OS=Bos taurus GN=DLST PE=1 SV=2	BOVIN	12	1.01888	0.684249	1.55597	0.470526	1.28742	0.984404	0.606531	0.955188	0.328984	0.963829	0.332966	0.47863	0.0104682	0.799216	5.88111	0.051	0.905814	0.0508097	0.96381	0.427726	0.772681	0.207019	0.868245	2.10565	0.324652
Uni_Bias2	499	336	3.75	12.6	51.01	46.31	46.31	tr|B3IVN4|B3IVN4_BOVIN	Pyruvate kinase (Fragment) OS=Bos taurus GN=PKM PE=2 SV=1	BOVIN	9	1.16992	0.380403	1.1695	0.549121	1.16971	1.36017	0.472367	0.940183	0.666424	0.794328	0.297168	0.660693	0.30067	0.798401	2.45031	0.286505	0.796608	0.3233	0.988566	0.939065	0.990832	0.539384	0.989699	0.590812	0.6989
Uni_Bias2	583	158	9.34	9.34	32.98	16.75	14.31	tr|F1MD19|F1MD19_BOVIN	Uncharacterized protein (Fragment) OS=Bos taurus GN=GPI PE=4 SV=1	BOVIN	6	0.995177	0.942074	0.972747	0.768222	0.983962	0.280856	0.8395	0.872275	0.0838133	0.772681	0.297366	0.731139	0.10288	0.792032	5.18213	0.07244	0.869731	0.103801	0.989658	0.876166	0.946237	0.710679	0.967947	0.411481	0.7985
NCBI_Bias2	13	317	3.86	12.35	51.01	46.31	41.61	gi|193248617	M1-type pyruvate kinase [Bos taurus]	Bos taurus	8	1.1695	0.634772	1.18032	0.54129	1.17491	0.927904	0.606531	0.937562	0.864094	0.787046	0.303997	0.648634	0.295562	0.791081	2.21984	0.324652	0.77983	0.518349	0.972747	0.948566	0.990832	0.565187	0.98179	0.541482	0.7596
Uni_Bias2	836	114	13.35	13.35	25.43	12.71	11.01	tr|Q3SZ00|Q3SZ00_BOVIN	HADHA protein OS=Bos taurus GN=HADHA PE=2 SV=1	BOVIN	8	1.03784	0.596959	1.90546	0.307196	1.47165	1.47328	0.472367	0.983127	0.701824	0.990832	0.596261	0.398107	0.0868746	0.790689	2.87888	0.22313	0.938753	0.500511	0.987683	0.803074	0.751623	0.184848	0.869653	1.65686	0.416862
NCBI_Bias2	381	310	4	4	16.32	5.44	5.44	gi|84000163	nucleosome assembly protein 1-like 4 [Bos taurus]	Bos taurus	2	1.00925	0.973563	0.990832	0.997991	1.00004	0.0250182	0.9864	0.816582	0.701939	0.724436	0.350522	0.824138	0.519431	0.788385	1.78691	0.367879	0.855067	0.765781	1.05682	0.897889	1.11686	0.614949	1.08684	0.515876	0.7596
Uni_Bias2	115	74	18.55	18.88	37.74	35.8	35.8	sp|P35705|PRDX3_BOVIN	Thioredoxin-dependent peroxide reductase, mitochondrial OS=Bos taurus GN=PRDX3 PE=1 SV=2	BOVIN	19	1.14079	0.224158	2.01372	0.413901	1.57726	2.0651	0.324652	1.00758	0.918644	0.887156	0.793032	0.452898	0.260098	0.782545	1.44485	0.472367	0.837652	0.180398	0.945833	0.389746	1.00925	0.912767	0.977543	0.897717	0.6376
Uni_Bias2	9	227	6.27	6.33	39.66	25.74	18.14	sp|A2VE52|ORN_BOVIN	Oligoribonuclease, mitochondrial OS=Bos taurus GN=REXO2 PE=2 SV=1	BOVIN	3	0.916502	0.3282	0.895365	0.743954	0.905934	1.22463	0.535261	0.820823	0.0754232	0.685488	0.365545	0.83946	0.707649	0.781924	3.41947	0.173774	0.936511	0.5707	1.04345	0.60598	1.08643	0.788708	1.06494	0.641251	0.6989
Uni_Bias2	98	282	4.7	5.03	18.59	11.78	4.188	sp|P21282|VATC1_BOVIN	V-type proton ATPase subunit C 1 OS=Bos taurus GN=ATP6V1C1 PE=1 SV=3	BOVIN	2	0.949796	0.528901	0.564937	0.599387	0.757367	0.997837	0.606531	0.935636	0.315564	0.698232	0.614674	0.711214	0.656946	0.781694	1.78948	0.367879	0.946774	0.524463	0.958792	0.512338	0.544503	0.641067	0.751648	0.96708	0.606531
Uni_Bias2	716	105	14.51	14.87	30.97	16.35	8.579	tr|F1MZU2|F1MZU2_BOVIN	Uncharacterized protein OS=Bos taurus GN=NSF PE=4 SV=1	BOVIN	7	1.06294	0.25124	1.15878	0.47227	1.11086	1.85144	0.367879	0.958916	0.382096	0.630957	0.380127	0.744732	0.288713	0.778202	2.75486	0.22313	0.920615	0.348145	1.01804	0.790032	1.38038	0.507712	1.19921	0.793476	0.6703
NCBI_Bias2	197	11	50.33	50.33	39.12	32.6	28.59	gi|300794306	dynamin-like 120 kDa protein, mitochondrial [Bos taurus]	Bos taurus	29	0.981748	0.821364	0.83946	0.968721	0.910604	0.198531	0.9048	0.954993	0.406384	0.672977	0.285799	0.685488	0.0389484	0.771152	4.68903	0.093014	0.937562	0.14789	0.954993	0.387436	0.801678	0.269571	0.878335	1.96225	0.367879
Uni_Bias2	177	253	5.57	5.58	18.39	6.403	2.91	sp|Q0IIM3|HS105_BOVIN	Heat shock protein 105 kDa OS=Bos taurus GN=HSPH1 PE=2 SV=1	BOVIN	2	1.01845	0.841365	1.00925	0.965498	1.01385	0.180528	0.9048	0.888672	0.196659	0.77983	0.243041	0.642688	0.100724	0.770397	4.63494	0.093014	0.81745	0.0961351	0.934245	0.366937	0.83946	0.360041	0.886853	1.75811	0.367879
NCBI_Bias2	239	17	36.7	36.7	46.96	39.92	38.21	gi|479	cytokeratin VIb [Bos taurus]	Bos taurus	32	1.00925	0.871908	1.28233	0.165114	1.14579	1.68349	0.416862	1.07647	0.345383	0.704693	0.437127	0.529663	0.0110608	0.770274	5.55461	0.056416	0.990832	0.992442	0.92045	0.42216	0.981748	0.410559	0.951099	1.5223	0.416862
Uni_Bias2	501	50	22.19	22.21	45.71	30.3	22.07	tr|B8Y898|B8Y898_BOVIN	Malic enzyme OS=Bos taurus GN=ME1 PE=2 SV=1	BOVIN	11	1.0976	0.205051	1.47231	0.409331	1.28496	2.15213	0.324652	1.00582	0.922783	0.765597	0.18724	0.519996	0.0984852	0.763803	3.53826	0.153355	0.895532	0.236807	0.973376	0.643737	0.990832	0.573402	0.982104	0.865665	0.6376
Uni_Bias2	12	64	20.78	20.86	19.47	15.03	11.63	sp|A3KMV5|UBA1_BOVIN	Ubiquitin-like modifier-activating enzyme 1 OS=Bos taurus GN=UBA1 PE=2 SV=1	BOVIN	12	0.84774		0.831764	0.726342	0.839752	0.277718	0.8395	0.707083		0.744732	0.596163	0.831764	0.730685	0.761193	0.72181	0.687289	0.778193		0.930724		0.928966	0.891017	0.929845	0.100228	0.9277
Uni_Bias2	806	13	46.03	46.09	92.89	88.89	83.56	tr|Q2KIV8|Q2KIV8_BOVIN	Glutathione S-transferase mu 3 (Brain) OS=Bos taurus GN=GSTM3 PE=2 SV=1	BOVIN	78	0.94804	0.201085	0.847227	0.511078	0.897634	1.97627	0.367879	0.860399	0.000430013	0.60256	0.00288924	0.801678	0.0208756	0.754879	15.1722	0.000431	0.899687	0.00563256	0.988889	0.76686	1.10662	0.839971	1.04776	0.382039	0.7985
NCBI_Bias2	431	44	24.02	24.63	28.15	24.88	21.15	gi|88954364	Protein disulfide isomerase family A, member 4 [Bos taurus]	Bos taurus	14	0.895365	0.551997	0.440555	0.472302	0.66796	1.16769	0.535261	0.816582	0.259577	0.461318	0.0297768	0.963829	0.388834	0.747243	5.04418	0.07244	0.912011	0.575216	1	0.998178	1.00925	0.842809	1.00463	0.150125	0.9048
Uni_Bias2	123	94	15.72	15.76	22.36	19.96	18.56	sp|P48644|AL1A1_BOVIN	Retinal dehydrogenase 1 OS=Bos taurus GN=ALDH1A1 PE=2 SV=3	BOVIN	10	1.02374	0.761916	0.847227	0.520751	0.935484	0.802925	0.6376	0.924862	0.41984	0.691831	0.111748	0.608135	0.179045	0.741609	4.15143	0.119433	0.8617	0.055265	0.952458	0.499885	0.787046	0.410328	0.869752	1.376	0.472367
Uni_Bias2	221	90	16.38	16.38	48.16	38.13	30.1	sp|Q2HJ97|PHB2_BOVIN	Prohibitin-2 OS=Bos taurus GN=PHB2 PE=2 SV=1	BOVIN	8	1.03116	0.725419	1.19124	0.825795	1.1112	0.445077	0.7985	0.998757	0.983847	0.83946	0.0333235	0.383707	0.0639663	0.740641	5.35674	0.063928	0.944851	0.373191	0.973467	0.663224	0.539511	0.291351	0.756489	1.42784	0.472367
NCBI_Bias2	33	180	7.89	16.13	51.65	37.36	35.99	gi|296473262	fructose-bisphosphate aldolase A [Bos taurus]	Bos taurus	12	1	0.942406	0.937562	0.883847	0.968781	0.15877	0.9048	0.972747	0.891768	0.972747	0.812859	0.270396	0.184058	0.73863	1.74956	0.416862	0.887156	0.39095	0.912011	0.500802	0.251189	0.0949023	0.5816	2.64611	0.22313
Uni_Bias2	462	216	6.63	16.33	51.65	33.24	31.87	tr|A6QLL8|A6QLL8_BOVIN	Fructose-bisphosphate aldolase OS=Bos taurus GN=ALDOA PE=2 SV=1	BOVIN	12	0.962791	0.733107	0.912011	0.861753	0.937401	0.398899	0.7985	0.955188	0.562402	0.972747	0.807315	0.272898	0.207412	0.733611	2.05215	0.324652	0.902919	0.31184	0.90726	0.251796	0.251189	0.100196	0.579224	3.1962	0.196912
Uni_Bias2	523	10	50.86	50.86	39.9	34.9	32.19	tr|E1BBC4|E1BBC4_BOVIN	Uncharacterized protein OS=Bos taurus GN=OPA1 PE=3 SV=1	BOVIN	32	0.963128	0.464628	0.847227	0.959948	0.905178	0.701293	0.6989	0.92827	0.117098	0.619441	0.107953	0.648634	0.0128297	0.732115	7.58	0.020754	0.945486	0.176821	0.978535	0.548812	0.824138	0.242536	0.901337	1.7516	0.367879
NCBI_Bias2	105	203	6.73	6.78	19.17	7.143	4.048	gi|296485379	heat shock 70kDa protein 4 [Bos taurus]	Bos taurus	3	0.928966	0.714408	0.660693	0.346462	0.79483	1.2128	0.535261	0.946237	0.801176	0.501187	0.0228737	0.711214	0.741731	0.719546	3.73338	0.153355	1.03753	0.824895	1.00925	0.917558	0.937562	0.801601	0.973407	0.266817	0.8395
Uni_Bias2	525	247	5.83	5.88	13.3	7.126	2.494	tr|E1BBY7|E1BBY7_BOVIN	Uncharacterized protein OS=Bos taurus GN=HSPA4 PE=3 SV=1	BOVIN	2	0.923125	0.350772	0.636796	0.336579	0.77996	1.85577	0.367879	0.952056	0.548091	0.487529	0.0221698	0.711214	0.749016	0.716933	4.08179	0.119433	1.0506	0.64172	1.0159	0.842961	0.92045	0.79793	0.968173	0.344455	0.8395
NCBI_Bias2	15	48	22.89	22.89	35.9	30.3	20.67	gi|220901386	malic enzyme 1 [Bos taurus]	Bos taurus	11	1.04713	0.294663	1.7378	0.26956	1.39246	2.20004	0.324652	0.990832	0.973355	0.724436	0.134819	0.416869	0.0245076	0.710712	4.98535	0.082085	0.946237	0.475942	1	0.700461	0.981748	0.591777	0.990874	0.764916	0.6703
NCBI_Bias2	325	38	25.52	31.83	33.58	21.89	18.03	gi|75775556	Tumor rejection antigen (gp96) 1 [Bos taurus]	Bos taurus	21	0.972747	0.936636	0.672977	0.754776	0.822862	0.301222	0.8395	1.00925	0.816583	0.510505	0.000452522	0.597035	0.00250024	0.705598	12.0688	0.002187	1.01859	0.87248	0.981748	0.87989	0.772681	0.513994	0.877214	0.689227	0.6989
NCBI_Bias2	299	73	18.79	18.79	63.82	55.26	55.26	gi|74354800	Non-metastatic cells 2, protein (NM23B) expressed in [Bos taurus]	Bos taurus	15	0.990832	0.834157	1.08643	0.769264	1.03863	0.385353	0.7985	0.928966	0.292028	0.737904	0.38394	0.448745	0.243797	0.705205	3.12657	0.196912	0.912011	0.141669	0.981748	0.497354	0.660693	0.541651	0.821221	1.13923	0.535261
NCBI_Bias2	145	40	25.21	25.22	41.25	26.9	24.09	gi|297474460	PREDICTED: keratin 6A-like [Bos taurus]	Bos taurus	28	0.912011	0.670315	0.816582	0.743258	0.864297	0.605163	0.6989	1	0.963958	0.461318	0.379183	0.648634	0.316591	0.703317	1.87319	0.367879	1.07647	0.654811	0.981748	0.982525	1.20226	0.396896	1.09201	0.81796	0.6376
Uni_Bias2	331	76	18.41	18.72	37.97	18.11	14.52	sp|Q3ZBT1|TERA_BOVIN	Transitional endoplasmic reticulum ATPase OS=Bos taurus GN=VCP PE=1 SV=1	BOVIN	10	0.997652	0.979208	1.11686	0.509697	1.05726	0.603626	0.6989	0.93516	0.162124	0.654636	0.012755	0.496592	0.0558586	0.695463	7.87476	0.016163	0.917647	0.311138	0.975784	0.669801	0.772681	0.275104	0.874233	1.46911	0.472367
NCBI_Bias2	437	197	7.12	9.18	25.54	11.79	9.107	gi|94534741	Glucosamine (N-acetyl)-6-sulfatase [Bos taurus]	Bos taurus	5	1.02802	0.837598	1.35519	0.820066	1.1916	0.326231	0.8395	0.92045	0.448447	0.648634	0.315933	0.515229	0.313691	0.694771	2.70438	0.25284	0.895365	0.432768	1	0.860858	1.1272	0.824476	1.0636	0.297781	0.8395
Uni_Bias2	644	49	22.23	22.23	63.53	52.63	52.63	tr|F1MPL4|F1MPL4_BOVIN	Uncharacterized protein OS=Bos taurus GN=NME1-NME2 PE=4 SV=1	BOVIN	19	1.08727	0.220949	1.28233	0.884496	1.1848	1.41803	0.472367	1.06303	0.351982	0.608135	0.352952	0.387258	0.2484	0.686142	3.02122	0.196912	0.927922	0.472706	0.947	0.415078	0.744732	0.698502	0.845866	1.07541	0.535261
Uni_Bias2	290	374	2.78	2.78	12.7	6.746	3.571	sp|Q3SZ20|GLYM_BOVIN	Serine hydroxymethyltransferase, mitochondrial OS=Bos taurus GN=SHMT2 PE=2 SV=1	BOVIN	1	0.977452	0.815151	0.963829	0.804317	0.970641	0.36667	0.7985	0.789615	0.0542243	0.510505	0.103646	0.751623	0.35871	0.683914	5.39102	0.063928	0.877958	0.182465	1.08267	0.43372	1.44544	0.229817	1.26406	2.00282	0.324652
Uni_Bias2	707	201	7.07	9.14	23.04	10.18	9.107	tr|F1MXZ0|F1MXZ0_BOVIN	Uncharacterized protein OS=Bos taurus GN=GNS PE=4 SV=1	BOVIN	5	1.01304	0.854347	1.31826	0.839166	1.16565	0.289036	0.8395	0.886605	0.143725	0.630957	0.312775	0.529663	0.329163	0.682409	3.65965	0.153355	0.909029	0.222924	1.03646	0.617845	1.15878	0.807476	1.09762	0.603981	0.6989
Uni_Bias2	635	434	2.02	16.14	63.16	34.82	32.79	tr|F1MNP5|F1MNP5_BOVIN	Uncharacterized protein (Fragment) OS=Bos taurus GN=YWHAB PE=4 SV=1	BOVIN	11	0.996481	0.959681	1.27057	0.610901	1.13353	0.463804	0.778801	1.06765	0.335491	0.559758	0.33395	0.394457	0.234781	0.673955	3.15995	0.196912	1.09258	0.198672	1.01794	0.723124	0.895365	0.899861	0.956651	0.373224	0.7985
NCBI_Bias2	243	98	14.74	14.74	39.04	33.56	26.37	gi|572619	tau-protein kinase II [Bos taurus]	Bos taurus	7	0.990832	0.936033	1.05682	0.948295	1.02382	0.103531	0.9277	0.895365	0.198947	0.57544	0.119247	0.524807	0.105967	0.665204	5.19929	0.07244	0.92045	0.262597	1.00925	0.915604	0.963829	0.890485	0.986541	0.177332	0.9048
Uni_Bias2	630	168	8.82	8.82	38.86	30.13	24.02	tr|F1MNI4|F1MNI4_BOVIN	Uncharacterized protein (Fragment) OS=Bos taurus GN=RAB5B PE=4 SV=1	BOVIN	6	1.01215	0.6569	1.43219	0.424795	1.22217	1.10864	0.535261	0.997483	0.945411	0.57544	0.474491	0.416869	0.128572	0.663264	2.47801	0.286505	0.972909	0.204323	0.984344	0.562084	1.08643	0.866091	1.03538	0.625271	0.6989
Uni_Bias2	40	61	20.91	21.5	72.32	69.64	66.96	sp|O77834|PRDX6_BOVIN	Peroxiredoxin-6 OS=Bos taurus GN=PRDX6 PE=1 SV=3	BOVIN	15	1.01981	0.726853	1.00925	0.79546	1.01453	0.475871	0.778801	0.922534	0.255938	0.366438	0.045143	0.691831	0.116586	0.660267	5.74126	0.056416	0.933513	0.331967	1.02923	0.693975	1.70608	0.409395	1.36766	1.09303	0.535261
Uni_Bias2	751	125	11.94	11.94	76	74.67	70	tr|F1N6C0|F1N6C0_BOVIN	Uncharacterized protein OS=Bos taurus GN=CALM PE=4 SV=1	BOVIN	9	1.0245	0.808106	1.69044	0.819933	1.35747	0.357507	0.7985	0.851162	0.0960672	0.49204	0.205615	0.636796	0.447877	0.659999	4.10642	0.119433	0.87464	0.140371	1.0493	0.688371	2.24905	0.413277	1.64917	1.09187	0.535261
Uni_Bias2	434	5	68.57	68.57	64.95	60	55.84	tr|A5D7E8|A5D7E8_BOVIN	PDIA3 protein OS=Bos taurus GN=PDIA3 PE=2 SV=1	BOVIN	52	1.00459	0.878076	0.879023	0.710882	0.941807	0.40934	0.7985	0.921268	0.0209349	0.510505	0.0263127	0.534564	0.0107157	0.655446	10.4579	0.005248	0.903208	0.00145769	0.982673	0.527473	0.972747	0.994528	0.97771	0.560365	0.6989
Uni_Bias2	629	126	11.87	11.87	25.05	11.65	11.65	tr|F1MMK2|F1MMK2_BOVIN	Uncharacterized protein OS=Bos taurus GN=G6PD PE=4 SV=1	BOVIN	6	1.07946	0.540253	0.648634	0.230605	0.864047	1.80907	0.367879	1.0535	0.526359	0.272898	0.0335218	0.613762	0.75727	0.646719	3.74828	0.153355	0.89769	0.468282	0.918218	0.357806	1.39316	0.434517	1.15569	1.61669	0.416862
Uni_Bias2	258	390	2.47	2.47	14.19	5.743	3.378	sp|Q2TBU2|TMX2_BOVIN	Thioredoxin-related transmembrane protein 2 OS=Bos taurus GN=TMX2 PE=2 SV=1	BOVIN	1	1.28824		1.38038	0.861014	1.33431	0.129979	0.9277	1.53175		0.237684	0.467243	0.158489	0.385726	0.64264	1.48836	0.472367	1.14113		0.957385		0.912011	0.928421	0.934698	0.0645101	0.9704
NCBI_Bias2	315	77	17.47	17.47	33.74	25.18	22	gi|7545448	MGP57/53 glycoprotein antigen [Bos taurus]	Bos taurus	9	0.954993	0.621009	0.613762	0.678378	0.784377	0.750861	0.6703	1.01859	0.734331	0.401791	0.00499413	0.501187	0.0449328	0.640523	7.56617	0.020754	1.03753	0.523755	0.972747	0.85039	0.809096	0.363501	0.890922	1.01975	0.535261
Uni_Bias2	587	42	24.11	24.76	28.15	24.88	21.15	tr|F1MEN8|F1MEN8_BOVIN	Uncharacterized protein OS=Bos taurus GN=PDIA4 PE=4 SV=1	BOVIN	14	0.906373	0.113034	0.487529	0.467761	0.696951	2.55353	0.25284	0.866325	0.00811433	0.299226	0.024475	0.744732	0.367722	0.636761	8.27301	0.014264	0.971621	0.604374	1.01361	0.766768	1.14815	0.786972	1.08088	0.438753	0.7985
Uni_Bias2	786	372	2.85	15.26	36.2	21.19	15.23	tr|Q17QL7|Q17QL7_BOVIN	KRT15 protein OS=Bos taurus GN=KRT15 PE=2 SV=2	BOVIN	14	0.874586		0.524807	0.341734	0.699697	0.932624	0.606531	1.05799		0.343558	0.215164	0.501187	0.308741	0.634245	2.35527	0.286505	1.10964		0.915049		0.765597	0.59734	0.840323	0.447557	0.7985
NCBI_Bias2	117	63	20.53	20.64	28.48	12.66	9.313	gi|296487671	extended synaptotagmin-like protein 1 [Bos taurus]	Bos taurus	10	1.10662	0.271065	4.69894	0.0540337	2.90278	3.66852	0.153355	0.928966	0.481704	0.666807	0.45317	0.301995	0.00485108	0.632589	5.95024	0.051	0.862979	0.174659	1.02802	0.675371	2.26986	0.627163	1.64894	0.746154	0.687289
Uni_Bias2	201	185	7.73	7.74	20.32	13.01	10.16	sp|Q1LZA3|ASNS_BOVIN	Asparagine synthetase [glutamine-hydrolyzing] OS=Bos taurus GN=ASNS PE=2 SV=3	BOVIN	4	0.969287	0.76426	0.831764	0.510223	0.900525	0.817998	0.6376	0.73584	0.00962185	0.549541	0.0747605	0.608135	0.131211	0.631172	8.0502	0.016163	0.711995	0.0079528	0.935359	0.332032	0.912011	0.800116	0.923685	1.15133	0.535261
Uni_Bias2	847	82	17.69	17.69	32.02	22.27	20.88	tr|Q3T0K7|Q3T0K7_BOVIN	MFGE8 protein OS=Bos taurus GN=MFGE8 PE=2 SV=1	BOVIN	9	0.967085	0.724657	0.990832	0.91824	0.978959	0.353822	0.7985	1.0275	0.747473	0.505825	0.018126	0.346737	0.0124868	0.626687	7.5433	0.020754	1.03794	0.781711	0.974366	0.83329	0.654636	0.168157	0.814501	1.70698	0.416862
NCBI_Bias2	383	145	9.92	10.03	37.04	27.78	27.78	gi|84000297	ras-related protein Rab-11A [Bos taurus]	Bos taurus	6	1.02802	0.851191	2.208	0.513425	1.61801	0.718991	0.687289	0.972747	0.945735	0.608135	0.700771	0.291072	0.338213	0.623985	1.29893	0.472367	0.946237	0.845963	1	0.951097	1.07647	0.98858	1.03823	0.0535268	0.9704
NCBI_Bias2	323	101	14.35	14.4	22.16	19.96	16.97	gi|75775505	Aldehyde dehydrogenase 1 family, member A1 [Bos taurus]	Bos taurus	8	1.01859	0.966498	1.07647	0.860686	1.04753	0.159908	0.9048	0.879023	0.377522	0.591562	0.120004	0.37325	0.105404	0.614611	4.64201	0.093014	0.801678	0.156991	0.92045	0.557702	0.744732	0.493227	0.832591	1.1211	0.535261
NCBI_Bias2	251	443	2	15.83	54.47	34.96	32.93	gi|71153774	RecName: Full=14-3-3 protein beta/alpha; AltName: Full=Protein kinase C inhibitor protein 1; Short=KCIP-1; Contains: RecName: Full=14-3-3 protein beta/alpha, N-terminally processed	BOVIN	12			1.20226	0.702109	1.20226	0.307192	0.8395			0.698232	0.533957	0.483059	0.316783	0.590646	1.54346	0.416862					0.831764	0.737733	0.831764	0.264202	0.8395
NCBI_Bias2	195	102	14.24	14.24	27.03	17.84	13.69	gi|297492702	PREDICTED: glucose-6-phosphate dehydrogenase isoform 1 [Bos taurus]	Bos taurus	7	0.937562	0.574933	0.672977	0.247065	0.805269	1.69514	0.416862	0.83946	0.109248	0.299226	0.0344201	0.619441	0.716312	0.586043	5.13934	0.07244	0.912011	0.363339	1.01859	0.743018	1.35519	0.452031	1.18689	0.947666	0.606531
Uni_Bias2	166	107	14.29	14.29	41.1	33.56	26.37	sp|Q02399|CDK5_BOVIN	Cyclin-dependent kinase 5 OS=Bos taurus GN=CDK5 PE=1 SV=2	BOVIN	7	0.959474	0.410548	1.01859	0.925783	0.989033	0.840255	0.6376	0.84149	0.0065544	0.465586	0.158924	0.448745	0.157575	0.585274	7.56958	0.020754	0.884815	0.0556326	1.00656	0.894305	1.00925	0.921469	1.0079	0.168067	0.9048
NCBI_Bias2	451	100	14.41	14.7	33.33	16.59	14.85	gi|95767537	thimet oligopeptidase 1 [Bos taurus]	Bos taurus	9	1.03753	0.702374	1.19124	0.142918	1.11439	1.99669	0.367879	0.903649	0.402519	0.501187	0.063466	0.343558	0.0014323	0.582798	8.87327	0.011109	0.83946	0.14781	0.954993	0.755692	0.870964	0.861804	0.912978	0.372493	0.7985
Uni_Bias2	421	44	23.91	25.98	59.86	41.59	31.97	sp|Q9TTK8|KCRU_BOVIN	Creatine kinase U-type, mitochondrial OS=Bos taurus GN=CKMT1 PE=2 SV=1	BOVIN	18	1.006	0.950036	1.18032	0.651246	1.09316	0.417031	0.7985	0.882331	0.224244	0.510505	0.26889	0.346737	0.0566868	0.579858	4.93244	0.082085	0.871104	0.013731	0.991511	0.853648	0.870964	0.757062	0.931237	0.37918	0.7985
NCBI_Bias2	101	123	12.03	12.03	20.48	12.94	10.93	gi|296484906	phospholipase A2-activating protein [Bos taurus]	Bos taurus	7	0.92045	0.669701	0.724436	0.467418	0.822443	1.00883	0.535261	0.698232	0.0991269	0.47863	0.0426578	0.49204	0.196747	0.556301	6.1598	0.043937	0.737904	0.14863	0.972747	0.920705	0.77983	0.672961	0.876289	0.415779	0.7985
NCBI_Bias2	51	5	66.71	66.71	64.75	59.8	55.84	gi|296475166	protein disulfide-isomerase A3 precursor [Bos taurus]	Bos taurus	51	1.01859	0.853432	0.879023	0.974369	0.948807	0.160215	0.9048	0.570164	0.0849087	0.529663	0.0567584	0.524807	0.0320848	0.541545	7.62144	0.020754	0.534564	0.0402411	0.946237	0.859604	0.92045	0.817266	0.933343	0.306677	0.8395
NCBI_Bias2	447	149	9.74	9.74	27.65	18.31	12.03	gi|94966765	glucose-6-phosphate isomerase [Bos taurus]	Bos taurus	5	1	0.764999	1.04713	0.340599	1.02356	1.16819	0.535261	0.937562	0.401965	0.37325	0.538709	0.30479	0.0413328	0.538534	4.09633	0.119433	0.903649	0.17715	0.963829	0.74826	0.698232	0.406872	0.831031	1.03298	0.535261
NCBI_Bias2	233	9	51.32	51.32	51.07	44.65	39.87	gi|3336842	bovine serum albumin [Bos taurus]	Bos taurus	32			1.14815	0.363133	1.14815	0.879868	0.6376			0.549541	0.0871488	0.524807	0.00524201	0.537174	6.68048	0.030197					1.09648	0.75842	1.09648	0.24018	0.882497
Uni_Bias2	788	96	15.42	15.42	31.21	24.6	19.82	tr|Q1JPA2|Q1JPA2_BOVIN	Eukaryotic translation elongation factor 1 gamma (Fragment) OS=Bos taurus GN=EEF1G PE=2 SV=1	BOVIN	9	0.935192	0.130697	0.654636	0.261484	0.794914	2.93258	0.22313	0.823436	0.000620317	0.334195	0.00519893	0.440555	0.0935683	0.532729	13.0407	0.001327	0.874233	0.00731432	0.99036	0.817657	0.903649	0.777458	0.947005	0.393504	0.7985
Uni_Bias2	757	62	20.82	20.97	24.57	12.1	9.304	tr|F1N785|F1N785_BOVIN	Uncharacterized protein OS=Bos taurus GN=ESYT1 PE=4 SV=1	BOVIN	10	1.06232	0.202497	5.59758	0.059955	3.32995	3.83151	0.135335	0.954993	0.324626	0.416869	0.433283	0.203236	0.00646401	0.525033	6.08269	0.043937	0.903606	0.0446678	1.00232	0.96238	3.13329	0.542436	2.0678	0.564609	0.6989
Uni_Bias2	274	86	17.14	17.14	41.44	25	25	sp|Q3MHL4|SAHH_BOVIN	Adenosylhomocysteinase OS=Bos taurus GN=AHCY PE=2 SV=3	BOVIN	10	0.993517	0.927362	1	0.675997	0.996759	0.405612	0.7985	0.859261	0.16488	0.420727	0.180716	0.270396	0.0249287	0.516794	6.25827	0.038774	0.846982	0.171017	0.979014	0.724516	0.704693	0.414546	0.841853	1.04476	0.535261
NCBI_Bias2	115	257	5.01	5.01	26.53	12.86	9.796	gi|296486956	adenylosuccinate lyase [Bos taurus]	Bos taurus	3	1.00925	0.955338	1.2942	0.511515	1.15172	0.621968	0.6989	0.903649	0.481547	0.319154	0.0039599	0.253513	0.101463	0.492105	7.42674	0.023518	0.912011	0.672489	1.01859	0.802037	0.946237	0.573432	0.982414	0.674648	0.6989
NCBI_Bias2	73	191	7.34	7.42	16.15	11.18	9.938	gi|296480110	DEAD (Asp-Glu-Ala-Asp) box polypeptide 6 [Bos taurus]	Bos taurus	4	1.02802	0.941915	1.23595	0.54193	1.13198	0.58409	0.6989	0.990832	0.998487	0.42462	0.141153	0.0597035	0.0204076	0.491718	5.08235	0.07244	0.831764	0.734177	0.862979	0.783103	0.18197	0.0630231	0.522474	2.61336	0.22313
Uni_Bias2	592	144	10.28	10.28	26.56	12.84	10.85	tr|F1MF89|F1MF89_BOVIN	Uncharacterized protein (Fragment) OS=Bos taurus GN=PLAA PE=4 SV=1	BOVIN	8	0.967312	0.756466	0.691831	0.713411	0.829572	0.535742	0.7596	0.86182	0.253527	0.260615	0.0124944	0.337287	0.00748495	0.486574	9.25014	0.009804	0.905106	0.441357	1.01333	0.906184	0.946237	0.821755	0.979785	0.256082	0.8395
NCBI_Bias2	169	70	19.21	19.22	25.62	14.04	12.7	gi|297486147	PREDICTED: NACHT, leucine rich repeat and PYD containing 7-like [Bos taurus]	Bos taurus	12	1.02802	0.842223	1.18032	0.694116	1.10417	0.466281	0.778801	0.912011	0.648219	0.30761	0.0686612	0.229087	0.0247111	0.482902	5.91735	0.051	0.862979	0.469515	0.972747	0.910147	0.831764	0.796847	0.902255	0.279027	0.8395
Uni_Bias2	407	110	14.04	15.68	45.3	29.87	23.49	sp|Q8SQH5|ADT2_BOVIN	ADP/ATP translocase 2 OS=Bos taurus GN=SLC25A5 PE=2 SV=3	BOVIN	8	0.981186	0.783732	0.737904	0.914882	0.859545	0.288935	0.8395	0.823051	0.0113304	0.369828	0.244212	0.251189	0.0511381	0.481356	7.69849	0.020754	0.802793	0.0190873	0.954933	0.421826	0.448745	0.382373	0.701839	1.58476	0.416862
Uni_Bias2	601	265	5.22	5.22	31.5	11.59	9.756	tr|F1MHP6|F1MHP6_BOVIN	Uncharacterized protein OS=Bos taurus GN=ADSL PE=4 SV=1	BOVIN	3	0.966384	0.682251	1.2942	0.459725	1.13029	1.00711	0.535261	0.846387	0.115208	0.319154	0.0038518	0.260615	0.117806	0.475385	8.56337	0.012588	0.906149	0.282887	1.03208	0.704351	0.963829	0.552248	0.997954	0.820154	0.6376
NCBI_Bias2	21	67	19.63	19.69	19.47	15.03	12	gi|296470781	ubiquitin-activating enzyme E1 [Bos taurus]	Bos taurus	12	1.02802	0.878754	1.03753	0.714727	1.03277	0.403985	0.7985	0.724436	0.217837	0.515229	0.041463	0.145881	0.00306543	0.461849	9.11543	0.009804	0.487529	0.0332204	0.717794	0.269658	0.270396	0.0539676	0.494095	3.67411	0.153355
NCBI_Bias2	357	41	24.68	24.73	44.2	30.02	25.05	gi|78369310	stress-induced-phosphoprotein 1 [Bos taurus]	Bos taurus	15	0.981748	0.910685	0.937562	0.95978	0.959655	0.11692	0.9277	0.570164	0.0224133	0.369828	0.00333665	0.401791	0.00496056	0.447261	12.8613	0.001503	0.580764	0.0176977	1.00925	0.992338	1.07647	0.810104	1.04286	0.189599	0.9048
Uni_Bias2	291	375	2.76	13.83	43.1	30.79	22.17	sp|Q3SZ54|IF4A1_BOVIN	Eukaryotic initiation factor 4A-I OS=Bos taurus GN=EIF4A1 PE=2 SV=1	BOVIN	10			1.10662	0.814543	1.10662	0.178172	0.9048			0.496592	0.304078	0.390841	0.23261	0.443717	2.30077	0.286505					0.870964	0.767588	0.870964	0.229744	0.882497
NCBI_Bias2	159	426	2.02	2.26	3.454	0.4872	0.2657	gi|297479879	PREDICTED: hypothetical protein [Bos taurus]	Bos taurus	1			0.981748	0.986761	0.981748	0.0115761	0.9864			0.444631	0.288873	0.432514	0.280805	0.438573	2.18178	0.324652					0.954993	0.943795	0.954993	0.0502449	0.9782
Uni_Bias2	2	500	1.87	1.92	7.629	1.907	1.907	RRRRRtr|E1BLW0|E1BLW0_BOVIN	REVERSED Uncharacterized protein OS=Bos taurus GN=MESP2 PE=4 SV=1	BOVIN	1			0.972747	0.971326	0.972747	0.02527	0.9864			0.416869	0.270585	0.432514	0.282503	0.424692	2.23335	0.324652					1.01859	0.961424	1.01859	0.0341698	0.9827
Uni_Bias2	841	172	8.46	8.46	14.5	8.6	8.6	tr|Q3SZJ7|Q3SZJ7_BOVIN	Lysosomal-associated membrane protein 2 OS=Bos taurus GN=LAMP2 PE=2 SV=1	BOVIN	6	0.951868	0.48627	0.772681	0.754467	0.862274	0.870965	0.6376	0.845112	0.0596216	0.121339	0.155713	0.226986	0.276296	0.397812	5.18179	0.07244	0.908767	0.211822	1.02067	0.76732	1.48594	0.886868	1.2533	0.334329	0.8395
NCBI_Bias2	79	351	2.85	2.87	7.518	2.781	1.854	gi|296481133	exportin-2 [Bos taurus]	Bos taurus	2	0.903649	0.663604	0.794328	0.519551	0.848989	0.924925	0.606531	0.679204	0.169767	0.255859	0.174192	0.248886	0.257416	0.394649	4.23696	0.119433	0.744732	0.244268	0.981748	0.978222	0.77983	0.81122	0.880789	0.200848	0.882497
Uni_Bias2	692	523	1.38	1.4	8.136	2.781	0.8239	tr|F1MWN1|F1MWN1_BOVIN	Uncharacterized protein OS=Bos taurus PE=4 SV=1	BOVIN	1	0.949312	0.741113	0.787046	0.513071	0.868179	0.839876	0.6376	0.658645	0.0410288	0.255859	0.173848	0.255859	0.264363	0.390121	5.44908	0.063928	0.731044	0.319165	1.04855	0.74759	0.794328	0.825473	0.921441	0.419268	0.7985
NCBI_Bias2	303	114	13.38	14.51	37.58	29.87	23.49	gi|74355032	Solute carrier family 25 (mitochondrial carrier; adenine nucleotide translocator), member 5 [Bos taurus]	Bos taurus	8	0.937562	0.798614	0.787046	0.779893	0.862304	0.411256	0.7985	0.60256	0.100424	0.30761	0.156673	0.187068	0.0361672	0.365746	6.48971	0.038774	0.57544	0.0268588	0.903649	0.545898	0.416869	0.501286	0.660259	1.12561	0.535261
NCBI_Bias2	171	237	5.5	18.4	22.65	15.02	14.08	gi|297486152	PREDICTED: NLR family, pyrin domain containing 2 [Bos taurus]	Bos taurus	12	0.895365	0.714777	0.787046	0.490632	0.841205	0.910147	0.606531	0.724436	0.327755	0.214783	0.044585	0.133045	0.0806771	0.357421	5.85702	0.051	0.794328	0.456363	0.981748	0.962768	0.501187	0.640743	0.741468	0.419588	0.7985
NCBI_Bias2	153	447	2	2.16	4.354	1.426	0.4505	gi|297477920	PREDICTED: hypothetical protein [Bos taurus]	Bos taurus	1
NCBI_Bias2	349	465	2	2	7.723	2.376	2.376	gi|78	annexin XI [Bos taurus]	Bos taurus	1
NCBI_Bias2	361	473	2	2	6.601	5.281	5.281	gi|7959093	mitochondrial carrier homolog 2 [Bos taurus]	Bos taurus	1
NCBI_Bias2	445	20	34.7	34.7	57.14	41.77	36.35	gi|94574274	ATP synthase, H+ transporting, mitochondrial F1 complex, alpha subunit 1, cardiac muscle [Bos taurus]	Bos taurus	30
Uni_Bias2	89	449	2	37.15	57.32	43.04	37.61	sp|P19483|ATPA_BOVIN	ATP synthase subunit alpha, mitochondrial OS=Bos taurus GN=ATP5A1 PE=1 SV=1	BOVIN	30
Uni_Bias2	107	466	2	2	8.549	2.386	2.386	sp|P27214|ANX11_BOVIN	Annexin A11 OS=Bos taurus GN=ANXA11 PE=1 SV=1	BOVIN	1
Uni_Bias2	162	441	2.01	20.8	54.21	46.11	36.45	sp|P81287|ANXA5_BOVIN	Annexin A5 OS=Bos taurus GN=ANXA5 PE=1 SV=3	BOVIN	13
Uni_Bias2	381	460	2	2.01	24.38	7.463	7.463	sp|Q5E9K0|PSB2_BOVIN	Proteasome subunit beta type-2 OS=Bos taurus GN=PSMB2 PE=1 SV=1	BOVIN	1
Uni_Bias2	384	480	2	2	9.053	2.469	2.469	sp|Q5E9T4|TPK1_BOVIN	Thiamin pyrophosphokinase 1 OS=Bos taurus GN=TPK1 PE=2 SV=1	BOVIN	1
Uni_Bias2	423	63	20.8	20.8	54.21	46.11	36.45	tr|A1L5B6|A1L5B6_BOVIN	Annexin 5 OS=Bos taurus GN=ANXA5 PE=2 SV=1	BOVIN	14
Uni_Bias2	565	451	2	13.44	58.02	33.79	22.87	tr|E1BNW1|E1BNW1_BOVIN	Uncharacterized protein OS=Bos taurus PE=4 SV=1	BOVIN	17
Uni_Bias2	619	17	37.2	37.2	57.32	43.04	37.61	tr|F1MLB8|F1MLB8_BOVIN	Uncharacterized protein OS=Bos taurus GN=ATP5A1 PE=4 SV=1	BOVIN	30
Uni_Bias2	649	477	2	2	6.601	5.281	5.281	tr|F1MR38|F1MR38_BOVIN	Uncharacterized protein OS=Bos taurus GN=MTCH2 PE=4 SV=1	BOVIN	1
Uni_Bias2	821	427	2.04	2.05	15.19	6.36	6.36	tr|Q3MHF7|Q3MHF7_BOVIN	PRDX3 protein OS=Bos taurus GN=PRDX3 PE=2 SV=1	BOVIN	1
NCBI_Bias2	17	442	2	34.7	54.43	41.77	36.35	gi|27807237	ATP synthase subunit alpha, mitochondrial precursor [Bos taurus]	Bos taurus	28
NCBI_Bias2	55	441	2.01	2.01	11.36	5.994	5.994	gi|296475405	reticulocalbin 2 [Bos taurus]	Bos taurus	1

## Sheet: Diff expressed proteins
N	Accession	Name	Species	Peptides(95%)	T1/C1 116:114 FC	T1/C1 PVal 116:114	T2/C2 116:114 FC	T2/C2 PVal 116:114	T3/C3 117:115 FC	T3/C3 PVal 117:115	Avg Treated/Control FC	Fisher's Exact Test (Meta-Anal)	Treated/Control Fisher's Exact Test (Meta-Anal) Pval	regulation	No
114	gi|74355032	Solute carrier family 25 (mitochondrial carrier; adenine nucleotide translocator), member 5	Bos taurus	8	0.60256	0.100424	0.30761	0.156673	0.187068	0.0361672	0.365746	6.48971	0.038774	Down	1
41	gi|78369310	stress-induced-phosphoprotein 1	Bos taurus	15	0.570164	0.0224133	0.369828	0.00333665	0.401791	0.00496056	0.447261	12.8613	0.001503	Down	2
67	gi|296470781	ubiquitin-activating enzyme E1	Bos taurus	12	0.724436	0.217837	0.515229	0.041463	0.145881	0.00306543	0.461849	9.11543	0.009804	Down	3
265	tr|F1MHP6|F1MHP6_BOVIN	Uncharacterized protein	Bos taurus	3	0.846387	0.115208	0.319154	0.0038518	0.260615	0.117806	0.475385	8.56337	0.012588	Down	4
110	sp|Q8SQH5|ADT2_BOVIN	ADP/ATP translocase 2	Bos taurus	8	0.823051	0.0113304	0.369828	0.244212	0.251189	0.0511381	0.481356	7.69849	0.020754	Down	5
144	tr|F1MF89|F1MF89_BOVIN	Uncharacterized protein (Fragment)	Bos taurus	8	0.86182	0.253527	0.260615	0.0124944	0.337287	0.00748495	0.486574	9.25014	0.009804	Down	6
257	gi|296486956	adenylosuccinate lyase	Bos taurus	3	0.903649	0.481547	0.319154	0.0039599	0.253513	0.101463	0.492105	7.42674	0.023518	Down	7
86	sp|Q3MHL4|SAHH_BOVIN	Adenosylhomocysteinase	Bos taurus	10	0.859261	0.16488	0.420727	0.180716	0.270396	0.0249287	0.516794	6.25827	0.038774	Down	8
62	tr|F1N785|F1N785_BOVIN	Uncharacterized protein	Bos taurus	10	0.954993	0.324626	0.416869	0.433283	0.203236	0.00646401	0.525033	6.08269	0.043937	Down	9
96	tr|Q1JPA2|Q1JPA2_BOVIN	Eukaryotic translation elongation factor 1 gamma (Fragment)	Bos taurus	9	0.823436	0.000620317	0.334195	0.00519893	0.440555	0.0935683	0.532729	13.0407	0.001327	Down	10
9	gi|3336842	bovine serum albumin	Bos taurus	32			0.549541	0.0871488	0.524807	0.00524201	0.537174	6.68048	0.030197	Down	11
5	gi|296475166	protein disulfide-isomerase A3 precursor	Bos taurus	51	0.570164	0.0849087	0.529663	0.0567584	0.524807	0.0320848	0.541545	7.62144	0.020754	Down	12
123	gi|296484906	phospholipase A2-activating protein	Bos taurus	7	0.698232	0.0991269	0.47863	0.0426578	0.49204	0.196747	0.556301	6.1598	0.043937	Down	13
100	gi|95767537	thimet oligopeptidase 1	Bos taurus	9	0.903649	0.402519	0.501187	0.063466	0.343558	0.0014323	0.582798	8.87327	0.011109	Down	14
107	sp|Q02399|CDK5_BOVIN	Cyclin-dependent kinase 5	Bos taurus	7	0.84149	0.0065544	0.465586	0.158924	0.448745	0.157575	0.585274	7.56958	0.020754	Down	15
82	tr|Q3T0K7|Q3T0K7_BOVIN	MFGE8 protein	Bos taurus	9	1.0275	0.747473	0.505825	0.018126	0.346737	0.0124868	0.626687	7.5433	0.020754	Down	16
185	sp|Q1LZA3|ASNS_BOVIN	Asparagine synthetase [glutamine-hydrolyzing]	Bos taurus	4	0.73584	0.00962185	0.549541	0.0747605	0.608135	0.131211	0.631172	8.0502	0.016163	Down	17
42	tr|F1MEN8|F1MEN8_BOVIN	Uncharacterized protein	Bos taurus	14	0.866325	0.00811433	0.299226	0.024475	0.744732	0.367722	0.636761	8.27301	0.014264	Down	18
77	gi|7545448	MGP57/53 glycoprotein antigen	Bos taurus	9	1.01859	0.734331	0.401791	0.00499413	0.501187	0.0449328	0.640523	7.56617	0.020754	Down	19
5	tr|A5D7E8|A5D7E8_BOVIN	PDIA3 protein	Bos taurus	52	0.921268	0.0209349	0.510505	0.0263127	0.534564	0.0107157	0.655446	10.4579	0.005248	Down	20
76	sp|Q3ZBT1|TERA_BOVIN	Transitional endoplasmic reticulum ATPase	Bos taurus	10	0.93516	0.162124	0.654636	0.012755	0.496592	0.0558586	0.695463	7.87476	0.016163	Down	21
38	gi|75775556	Tumor rejection antigen (gp96) 1	Bos taurus	21	1.00925	0.816583	0.510505	0.000452522	0.597035	0.00250024	0.705598	12.0688	0.002187	Down	22
10	tr|E1BBC4|E1BBC4_BOVIN	Uncharacterized protein	Bos taurus	32	0.92827	0.117098	0.619441	0.107953	0.648634	0.0128297	0.732115	7.58	0.020754	Down	23
13	tr|Q2KIV8|Q2KIV8_BOVIN	Glutathione S-transferase mu 3 (Brain)	Bos taurus	78	0.860399	0.000430013	0.60256	0.00288924	0.801678	0.0208756	0.754879	15.1722	0.000431	Down	24
46	sp|Q29RZ0|THIL_BOVIN	Acetyl-CoA acetyltransferase, mitochondrial	Bos taurus	14	1.1201	0.0417443	1.59956	0.0215266	1.35519	0.108654	1.35828	8.02077	0.016163	up	1
72	sp|A7MBJ5|CAND1_BOVIN	Cullin-associated NEDD8-dissociated protein 1	Bos taurus	10	1.27687	0.000825381	1.69044	0.0254552	1.35519	0.113919	1.44083	11.2419	0.003607	up	2
37	sp|Q3ZCJ7|TBA1C_BOVIN	Tubulin alpha-1C chain	Bos taurus	19	1.07493	0.082497	1.7378	0.0992899	1.97697	0.016168	1.59657	7.756	0.018316	up	3
9	tr|A6H7J6|A6H7J6_BOVIN	P4HB protein	Bos taurus	37	1.07702	0.0190921	1.44544	0.271993	2.63027	0.0577146	1.71758	7.04661	0.026649	up	4
8	tr|E1B748|E1B748_BOVIN	Uncharacterized protein	Bos taurus	30	1.15871	0.000341824	3.16228	0.0257929	1.65959	0.31489	1.99352	11.1131	0.003607	up	5
7	gi|332634826	hypoxia up-regulated protein 1	Bos taurus	31	1.64437	0.019122	3.59749	0.0139588	1.65959	0.272433	2.30048	8.27672	0.014264	up	6
16	sp|P10096|G3P_BOVIN	Glyceraldehyde-3-phosphate dehydrogenase	Bos taurus	38	1.03382	0.435288	2.1677	0.149819	5.24807	0.0150127	2.81653	6.01839	0.043937	up	7
14	gi|85682743	RecName: Full=Glyceraldehyde-3-phosphate dehydrogenase	Bos taurus	37	1.38038	0.18157	2.29087	0.134528	5.34564	0.0108264	3.00563	7.15532	0.026649	up	8
85	tr|E1BFC9|E1BFC9_BOVIN	Uncharacterized protein	Bos taurus	18	0.865161	0.270372	0.648634	0.00191135	1.00925	0.00421928	0.841016	11.3229	0.003183
78	gi|166795315	glutathione reductase, mitochondrial	Bos taurus	14	1.00925	0.388278	0.895365	0.0340594	0.619441	0.0201506	0.841353	7.14866	0.026649
4	tr|F1N404|F1N404_BOVIN	Uncharacterized protein (Fragment)	Bos taurus	82	0.889149	0.001512	1.14815	0.000665092	0.505825	2.86993e-06	0.847709	23.0794	0.0001
94	gi|75057908	RecName: Full=Cochlin; Flags: Precursor	Bos taurus	8	0.937562	0.383359	0.519996	0.0455152	1.13763	0.0548796	0.865062	6.03765	0.043937
103	tr|F1N103|F1N103_BOVIN	Uncharacterized protein	Bos taurus	9	0.933109	0.225347	0.510505	0.0426374	1.1695	0.0596498	0.871038	6.4835	0.038774
38	tr|F1MZ62|F1MZ62_BOVIN	Uncharacterized protein	Bos taurus	18	1.01273	0.802382	0.824138	0.000404045	0.83946	0.0032894	0.892109	11.9441	0.002479
3	gi|297472337	PREDICTED: egg and embryo abundant-peptidyl arginine deiminase-like protein-like	Bos taurus	79	1.05682	0.0309505	1.1695	0.00109279	0.457088	2.9657e-06	0.894468	19.9973	0.0001
130	tr|F1MBE7|F1MBE7_BOVIN	Uncharacterized protein (Fragment)	Bos taurus	8	1.00397	0.961476	0.847227	0.0120552	0.83946	0.0103684	0.896887	7.84035	0.016163
125	gi|297483439	PREDICTED: 1-aminocyclopropane-1-carboxylate synthase-like protein 2-like	Bos taurus	8	1.05682	0.605648	0.887156	0.0121421	0.879023	0.00974211	0.940999	8.28966	0.014264
18	tr|E1BL33|E1BL33_BOVIN	Uncharacterized protein	Bos taurus	22	1.03034	0.590375	1.05682	0.31825	0.737904	0.00134497	0.941688	7.19478	0.026649
24	gi|297486216	PREDICTED: NLR family, pyrin domain containing 8	Bos taurus	20	1.45881	0.313661	1.38038	0.270615	0.636796	0.000654023	1.15866	8.51119	0.012588
