# Supplementary material for: Treatment with the Proteasome Inhibitor MG132 during the End of Oocyte Maturation Improves Oocyte Competence for Development after Fertilization in Cattle
Source: PubMed Central journal article supplement (PMC3492449; doi:10.1371/journal.pone.0048613), 2012-11-07
Supplement: pone.0048613.s003.pdf [file pone.0048613.s003.pdf]

Table S1. Number of proteins identified at critical false discovery rates (FDR) from two databases.

| FDR from the NCBI database |           |            |                     |
|----------------------------|-----------|------------|---------------------|
| Accepted FDR               | Local FDR | Global FDR | Global FDR from Fit |
| 0.01%                      | 441       | 532        | 534                 |
| 0.05%                      | 497       | 587        | 589                 |
| 0.10%                      | 515       | 636        | 633                 |

  

| FDR from the Uniprot database |           |            |                     |
|-------------------------------|-----------|------------|---------------------|
| Accepted FDR                  | Local FDR | Global FDR | Global FDR from Fit |
| 0.01%                         | 447       | 503        | 529                 |
| 0.05%                         | 493       | 583        | 591                 |
| 0.10%                         | 510       | 643        | 645                 |
